# Supplementary material for: Bioactive release and modulation of urolithin metabotype A phenotype gut microbiota during in vitro digestion and fermentation of ellagic acid-rich fruit polyphenols
Source: Royal Society of Chemistry journal article supplement (doi:10.1039/d4fo06221c), 2025-01-01
Supplement: d4fo06221c1.xlsx [file d4fo06221c1.xlsx]

## Sheet: Figure 1
A
	Initial			Oral phase			Gastric phase			Intestinal phase
ST	1571.23	1588.7	1556.38	1466.12	1470.49	1444.29	1324.33	1368.88	1353.15	1034.33	1021.23	996.774
RA	1546.48	1529.02	1566.58	1565.41	1575.02	1561.04	1473.99	1486.21	1467.87	990.077	1025.02	1022.4
CC	263.857	266.041	264.73	242.748	243.185	249.299	206.498	210.866	209.119	166.173	155.254	152.197
PO	331.523	309.686	329.339	166.289	142.268	157.554	139.357	150.275	139.357	65.1108	130.622	58.5597
B
	Initial			Oral phase			Gastric phase			Intestinal phase
ST	1800.9	1938.41	1822.61	2133.82	1873.27	1200.2	1214.67	1200.2	1106.11	751.48	758.717	425.798
RA	363.074	392.024	406.498	310	324.475	389.611	418.561	447.51	186.965	278.639	322.063	170.078
CC	365.487	358.25	343.775	307.588	322.063	314.825	155.603	148.366	162.841	133.891	112.179	133.891
PO	763.542	819.631	828.678	637.189	675.186	667.948	315.73	330.205	342.87	334.426	321.761	336.236
C
	Initial			Oral phase			Gastric phase			Intestinal phase
ST	103.863	101.128	100.216	92.4672	92.4672	90.188	68.3077	70.1311	68.3077	66.4843	59.6467	66.9402
RA	150.359	146.256	143.521	143.065	143.065	141.698	141.698	146.256	137.14	87.453	100.672	96.114
CC	10.7825	10.4027	9.87084	9.87084	9.75689	9.90883	8.23742	8.08547	8.50332	6.75594	5.9962	5.23647
PO	35.3769	35.6861	32.1299	35.5315	34.4492	33.0576	23.0073	19.6057	19.915	15.7402	14.0394	11.5655
D
	Initial			Oral phase			Gastric phase			Intestinal phase
ST	300.75	298.384	301.341	272.358	274.133	274.724	274.133	278.273	277.09	249.29	259.937	245.741
RA	338.014	335.057	344.521	327.959	329.142	329.142	312.58	312.58	314.354	246.924	247.515	251.064
CC	28.365	29.0058	28.7594	28.0693	28.2664	27.9707	28.02	27.4778	27.8228	27.4778	26.6398	25.1611
PO	79.225	80.4573	79.225	73.5565	76.0211	71.5849	68.6274	68.8738	69.1203	46.4462	47.1856	45.9533
E
	Initial			Oral phase			Gastric phase			Intestinal phase
ST	31.2327	30.6931	40.9442	18.4638	38.9659	32.4916	26.1971	31.0528	42.9224	35.7287	21.701	37.8869
RA	42.263	44.0615	43.1622	35.6088	32.7314	33.0911	28.2353	35.2492	26.7965	20.5021	18.5238	13.8479
CC	5.13551	4.85076	5.45023	4.89572	4.77582	5.43524	3.8916	4.16136	3.29212	3.33708	2.76758	2.45285
PO	24.9981	34.7096	34.5298	29.8539	28.7748	27.3361	17.9843	17.9843	14.9269	8.81229	7.91308	8.27276

## Sheet: Figure 2
A						B					C
	Time	1	2	3		Volunteer 1	0.661158	0.627645	0.617333		Time	Intensity
	11.5047	1.60646	1.20115	1.26696		Volunteer 2	0.585538	0.64569	0.551164		4.30292	201921
	11.5113	1.59979	1.19209	1.25933		Volunteer 3	0.639675	0.640535	0.696391		4.31797	206093
	11.518	1.59264	1.18208	1.25408							4.3225	203595
	11.5247	1.58501	1.17254	1.24931							4.33765	195985
	11.5313	1.57642	1.16491	1.24455							4.35282	184909
	11.538	1.56736	1.15967	1.24025							4.36785	1452378
	11.5447	1.5583	1.15824	1.23739							4.38497	1559073
	11.5513	1.55163	1.15919	1.23453							4.40138	2023650
	11.558	1.54686	1.16205	1.22976							4.41757	1465695
	11.5647	1.54352	1.16491	1.22309							4.43307	1271885
	11.5713	1.54066	1.16634	1.21403							4.44852	1503640
	11.578	1.5378	1.1673	1.20354							4.46415	1661923
	11.5847	1.53303	1.16777	1.19209							4.4798	1819353
	11.5913	1.52397	1.16825	1.17874							4.49548	2321381
	11.598	1.5111	1.16825	1.16396							4.51145	2843899
	11.6047	1.49679	1.16873	1.14965							4.52735	2141739
	11.6113	1.48201	1.16777	1.13678							4.54248	2141042
	11.618	1.4658	1.16491	1.12534							4.55765	2228201
	11.6247	1.45101	1.1611	1.11437							4.57287	2168661
	11.6313	1.43862	1.15633	1.10388							4.5881	1769253
	11.638	1.42908	1.15013	1.09577							4.60338	2034480
	11.6447	1.41954	1.1425	1.09005							4.61885	5789714
	11.6513	1.41144	1.13583	1.08433							4.63478	4527410
	11.658	1.40476	1.12724	1.07861							4.64995	2989834
	11.6647	1.39904	1.11675	1.07193							4.66515	2079562
	11.6713	1.39427	1.1034	1.06525							4.68077	3082995
	11.678	1.3895	1.08862	1.05619							4.69613	2610992
	11.6847	1.38426	1.07288	1.04618							4.71138	2057687
	11.6913	1.37901	1.05715	1.03664							4.72668	2083059
	11.698	1.37281	1.04284	1.02949							4.74213	2701301
	11.7047	1.36566	1.02997	1.02425							4.75768	4834712
	11.7113	1.35613	1.01852	1.01995							4.77323	3065997
	11.718	1.34516	1.00851	1.01662							4.78833	1818153
	11.7247	1.33371	0.998497	1.01423							4.8034	2072201
	11.7313	1.32227	0.988007	1.01137							4.81855	3011790
	11.738	1.30987	0.976086	1.00851							4.83373	1998695
	11.7447	1.29843	0.964165	1.00565							4.8487	1642528
	11.7513	1.28794	0.953197	1.0047							4.86357	989881
	11.758	1.27888	0.944138	1.00708							4.87863	698555
	11.7647	1.27029	0.936508	1.01185							4.89368	944559
	11.7713	1.26219	0.931263	1.019							4.90895	4575270
	11.778	1.25503	0.926495	1.02758							4.92455	4517078
	11.7847	1.24788	0.923157	1.0376							4.93963	2936478
	11.7913	1.24168	0.920773	1.04904							4.95472	1491734
	11.798	1.23548	0.918388	1.06144							4.96978	1455227
	11.8047	1.22833	0.916958	1.07479							4.98492	2075409
	11.8113	1.22166	0.917912	1.09053							5.00018	2109698
	11.818	1.21593	0.92268	1.10912							5.01542	1270223
	11.8247	1.21117	0.929832	1.13249							5.03058	1014356
	11.8313	1.20735	0.939846	1.16062							5.04585	958142
	11.838	1.20449	0.951767	1.19305							5.06123	1080499
	11.8447	1.20401	0.966072	1.23072							5.07682	826228
	11.8513	1.20592	0.982761	1.27459							5.09235	990128
	11.858	1.2083	1.00088	1.32465							5.10815	991021
	11.8647	1.2126	1.02234	1.37854							5.12402	949065
	11.8713	1.2207	1.04952	1.43623							5.13988	1041391
	11.878	1.23167	1.08147	1.49775							5.15582	1641334
	11.8847	1.24407	1.11628	1.56403							5.17183	2553532
	11.8913	1.25837	1.15251	1.63269							5.18702	2724980
	11.898	1.27363	1.19066	1.70183							5.2019	5635411
	11.9047	1.28937	1.22833	1.7705							5.21688	7125416
	11.9113	1.3032	1.26457	1.83964							5.23198	4431786
	11.918	1.31702	1.30129	1.9083							5.247	1464860
	11.9247	1.33276	1.34039	1.97649							5.262	455301
	11.9313	1.34993	1.38187	2.04325							5.2769	946103
	11.938	1.369	1.4267	2.10953							5.29197	5027044
	11.9447	1.39093	1.47295	2.1739							5.30713	6381036
	11.9513	1.41573	1.52206	2.23637							5.32215	3056120
	11.958	1.44196	1.57118	2.29645							5.33713	832666
	11.9647	1.46818	1.61982	2.35176							5.35192	313828
	11.9713	1.49584	1.66702	2.40326							5.36668	296810
	11.978	1.52302	1.71328	2.45094							5.38162	542177
	11.9847	1.54781	1.7581	2.49481							5.39675	687440
	11.9913	1.57022	1.79958	2.53487							5.41198	517387
	11.998	1.59121	1.84011	2.57111							5.42725	601315
	12.0047	1.61171	1.88065	2.60305							5.44272	742970
	12.0113	1.63221	1.91927	2.63023							5.45828	879948
	12.018	1.65367	1.95694	2.65217							5.47388	714689
	12.0247	1.67704	1.99509	2.66838							5.4895	535726
	12.0313	1.70326	2.03371	2.67839							5.505	512927
	12.038	1.73283	2.07138	2.68269
	12.0447	1.7643	2.10762	2.68173
	12.0513	1.79815	2.14386	2.67601
	12.058	1.83392	2.17962	2.66504
	12.0647	1.87397	2.21348	2.65026
	12.0713	1.91832	2.24352	2.62976
	12.078	1.96552	2.26974	2.60496
	12.0847	2.01464	2.29216	2.57444
	12.0913	2.06614	2.31075	2.53916
	12.098	2.11954	2.32553	2.49815
	12.1047	2.17438	2.33555	2.4519
	12.1113	2.22874	2.34175	2.40135
	12.118	2.28119	2.34413	2.34699
	12.1247	2.33221	2.34175	2.2893
	12.1313	2.38323	2.33316	2.22874
	12.138	2.43282	2.31695	2.16579
	12.1447	2.48003	2.29549	2.10237
	12.1513	2.52628	2.26974	2.03848
	12.158	2.57111	2.24066	1.97363
	12.1647	2.61164	2.20823	1.90926
	12.1713	2.64692	2.17295	1.84536
	12.178	2.67601	2.13575	1.78289
	12.1847	2.69747	2.09665	1.72281
	12.1913	2.71082	2.05612	1.66369
	12.198	2.71511	2.01368	1.60646
	12.2047	2.71225	1.96934	1.55163
	12.2113	2.70176	1.92404	1.50061
	12.218	2.68269	1.87826	1.45245
	12.2247	2.65789	1.83201	1.40619
	12.2313	2.62833	1.78528	1.36328
	12.238	2.59352	1.7395	1.3237
	12.2447	2.55251	1.6942	1.28603
	12.2513	2.50721	1.65033	1.25074
	12.258	2.45762	1.60742	1.21641
	12.2647	2.40564	1.56593	1.18351
	12.2713	2.35128	1.52493	1.15061
	12.278	2.29597	1.48392	1.11866
	12.2847	2.24161	1.44291	1.08862
	12.2913	2.18773	1.40238	1.06001
	12.298	2.1348	1.36137	1.03331
	12.3047	2.07996	1.32179	1.0066
	12.3113	2.02465	1.28317	0.9799
	12.318	1.96886	1.24645	0.952721
	12.3247	1.91259	1.21069	0.925541
	12.3313	1.85728	1.17779	0.898361
	12.338	1.80435	1.14632	0.872612
	12.3447	1.75524	1.11628	0.849724
	12.3513	1.70994	1.08624	0.830173
	12.358	1.66607	1.05715	0.813961
	12.3647	1.62363	1.02949	0.800133
	12.3713	1.58405	1.00279	0.786781
	12.378	1.54638	0.976563	0.773907
	12.3847	1.51014	0.94986	0.761032
	12.3913	1.4739	0.92411	0.749588
	12.398	1.4391	0.899792	0.738621
	12.4047	1.40619	0.877857	0.72813
	12.4113	1.37377	0.85783	0.71907
	12.418	1.34134	0.839233	0.710964
	12.4247	1.31082	0.822544	0.704288
	12.4313	1.2846	0.806808	0.698566
	12.438	1.26266	0.790596	0.693798
	12.4447	1.24455	0.773907	0.689983
	12.4513	1.22786	0.758171	0.685692
	12.458	1.21212	0.743866	0.680923
	12.4647	1.19734	0.730515	0.674248
	12.4713	1.1816	0.718594	0.666142
	12.478	1.16491	0.707626	0.657558
	12.4847	1.14822	0.697136	0.649452
	12.4913	1.13296	0.686169	0.640869
	12.498	1.11961	0.674248	0.632763
	12.5047	1.10674	0.66185	0.626087
	12.5113	1.09434	0.649929	0.619888
	12.518	1.08194	0.638008	0.612736
	12.5247	1.07098	0.627041	0.60463
	12.5313	1.06001	0.61655	0.596523
	12.538	1.04952	0.606537	0.590324
	12.5447	1.03903	0.597954	0.585079
	12.5513	1.02997	0.591755	0.580311
	12.558	1.02282	0.587463	0.576019
	12.5647	1.01519	0.583172	0.572205
	12.5713	1.00756	0.577927	0.568867
	12.578	0.999928	0.573635	0.565529
	12.5847	0.994205	0.569344	0.562668
	12.5913	0.989437	0.564098	0.561237
	12.598	0.984669	0.558853	0.56076
	12.6047	0.982285	0.554562	0.560284
	12.6113	0.981331	0.551224	0.558853
	12.618	0.979424	0.547886	0.556469
	12.6247	0.976086	0.545979	0.553608
	12.6313	0.972748	0.545502	0.551224
	12.638	0.968933	0.545025	0.549793
	12.6447	0.965595	0.545502	0.548363
	12.6513	0.962734	0.545979	0.548363
	12.658	0.962734	0.546932	0.549316
	12.6647	0.963211	0.546455	0.55027
	12.6713	0.963688	0.543594	0.55027
	12.678	0.962257	0.538349	0.549316
	12.6847	0.960827	0.531673	0.548363
	12.6913	0.95892	0.524521	0.548363
	12.698	0.957012	0.518322	0.547886
	12.7047	0.954628	0.513554	0.547886
	12.7113	0.951767	0.511646	0.546455
	12.718	0.949383	0.511646	0.544071
	12.7247	0.946999	0.5126	0.540257
	12.7313	0.944138	0.513554	0.535965
	12.738	0.941277	0.513077	0.531673
	12.7447	0.938892	0.510693	0.527382
	12.7513	0.937462	0.506878	0.524044
	12.758	0.936508	0.50211	0.521183
	12.7647	0.934601	0.497341	0.518322
	12.7713	0.931263	0.49305	0.514984
	12.778	0.926971	0.488281	0.510216
	12.7847	0.921249	0.484467	0.504017
	12.7913	0.915527	0.481129	0.497818
	12.798	0.909328	0.477791	0.494003
	12.8047	0.903606	0.473976	0.491142
	12.8113	0.898838	0.469208	0.488758
	12.818	0.895023	0.465393	0.487804
	12.8247	0.891209	0.462532	0.487328
	12.8313	0.887394	0.461102	0.486374
	12.838	0.883579	0.461102	0.484467
	12.8447	0.881195	0.461578	0.482082
	12.8513	0.879765	0.462055	0.479221
	12.858	0.879765	0.460148	0.475883
	12.8647	0.879765	0.457287	0.473499
	12.8713	0.879288	0.454426	0.471115
	12.878	0.878334	0.451565	0.468731
	12.8847	0.876427	0.449181	0.466347
	12.8913	0.874043	0.449181	0.463963
	12.898	0.871181	0.451565	0.462532
	12.9047	0.86832	0.452518	0.461578
	12.9113	0.865459	0.452042	0.459671
	12.918	0.863075	0.451565	0.458241
	12.9247	0.861645	0.451565	0.457287
	12.9313	0.859737	0.451088	0.45681
	12.938	0.858307	0.450611	0.457287
	12.9447	0.857353	0.451565	0.458717
	12.9513	0.857353	0.452518	0.462055
	12.958	0.858307	0.452518	0.46587
	12.9647	0.859737	0.451088	0.471115
	12.9713	0.860214	0.449657	0.47636
	12.978	0.859737	0.449181	0.479698
	12.9847	0.858784	0.448704	0.481606
	12.9913	0.858307	0.448227	0.482082
	12.998	0.85783	0.448704	0.482559
	13.0047	0.85783	0.448704	0.483036
	13.0113	0.858307	0.449181	0.482559
	13.018	0.859737	0.449657	0.481606
	13.0247	0.861645	0.450611	0.479698
	13.0313	0.861645	0.450611	0.477791
	13.038	0.859737	0.449657	0.474453
	13.0447	0.8564	0.448227	0.469685
	13.0513	0.853062	0.445843	0.46587
	13.058	0.848293	0.442028	0.461578
	13.0647	0.844002	0.435829	0.45681
	13.0713	0.840664	0.42963	0.452995
	13.078	0.839233	0.424862	0.449657
	13.0847	0.839233	0.42057	0.446796
	13.0913	0.838757	0.415325	0.442982
	13.098	0.837326	0.409126	0.440121
	13.1047	0.833511	0.404835	0.436306
	13.1113	0.828266	0.40102	0.430584
	13.118	0.82159	0.396252	0.424862
	13.1247	0.814438	0.39053	0.42057
	13.1313	0.807762	0.385761	0.418663
	13.138	0.803471	0.383854	0.417233
	13.1447	0.801563	0.382423	0.416756
	13.1513	0.800133	0.380516	0.417233
	13.158	0.796795	0.379086	0.416279
	13.1647	0.79155	0.377178	0.413418
	13.1713	0.785828	0.374794	0.409126
	13.178	0.779629	0.370979	0.404835
	13.1847	0.773907	0.367641	0.40102
	13.1913	0.770092	0.364304	0.396729
	13.198	0.767708	0.360966	0.393867
	13.2047	0.767708	0.357628	0.390053
	13.2113	0.769138	0.355721	0.385761
	13.218	0.769138	0.35429	0.380993
	13.2247	0.768185	0.351429	0.376701
	13.2313	0.765324	0.348091	0.373363
	13.238	0.761509	0.343323	0.370026
	13.2447	0.755787	0.338554	0.367641
	13.2513	0.748158	0.333786	0.365734
	13.258	0.740528	0.329971	0.363827
	13.2647	0.732422	0.32711	0.360966
	13.2713	0.725269	0.325203	0.356674
	13.278	0.71907	0.324726	0.352383
	13.2847	0.715733	0.32568	0.349045
	13.2913	0.714302	0.326633	0.345707
	13.298	0.713825	0.32711	0.343323
	13.3047	0.713348	0.326633	0.341892
	13.3113	0.713348	0.324726	0.341892
	13.318	0.712872	0.322819	0.342846
	13.3247	0.710487	0.320911	0.343323
	13.3313	0.708103	0.31805	0.3438
	13.338	0.705242	0.314236	0.3438
	13.3447	0.702858	0.309944	0.344276
	13.3513	0.701427	0.307083	0.34523
	13.358	0.701904	0.305653	0.347137
	13.3647	0.703335	0.303745	0.350952
	13.3713	0.704288	0.303268	0.35429
	13.378	0.703335	0.305176	0.358105
	13.3847	0.701904	0.309944	0.360966
	13.3913	0.701427	0.315189	0.363827
	13.398	0.700951	0.320435	0.367165
	13.4047	0.701427	0.32568	0.37241
	13.4113	0.702858	0.329971	0.380993
	13.418	0.706673	0.334263	0.39053
	13.4247	0.710964	0.339031	0.40102
	13.4313	0.715256	0.342846	0.411034
	13.438	0.718117	0.345707	0.420094
	13.4447	0.720501	0.349045	0.427723
	13.4513	0.722408	0.353336	0.433445
	13.458	0.723362	0.358582	0.43869
	13.4647	0.724316	0.362396	0.443935
	13.4713	0.725746	0.366211	0.449181
	13.478	0.7267	0.370502	0.454426
	13.4847	0.7267	0.374794	0.459194
	13.4913	0.727654	0.377655	0.462532
	13.498	0.729084	0.379086	0.464439
	13.5047	0.729561	0.380516	0.464916
	13.5113	0.72813	0.380516	0.463963
	13.518	0.726223	0.379086	0.461102
	13.5247	0.724792	0.375748	0.456333
	13.5313	0.723362	0.371456	0.451565
	13.538	0.720978	0.366211	0.44775
	13.5447	0.718594	0.360489	0.44632
	13.5513	0.715733	0.355244	0.448227
	13.558	0.712395	0.351906	0.457287
	13.5647	0.70858	0.350952	0.474453
	13.5713	0.704765	0.352859	0.50354
	13.578	0.701904	0.358582	0.55027
	13.5847	0.700474	0.370502	0.621319
	13.5913	0.701904	0.392437	0.720978
	13.598	0.708103	0.427246	0.853539
	13.6047	0.720024	0.480652	1.0252
	13.6113	0.741959	0.556946	1.23882
	13.618	0.775337	0.662804	1.49393
	13.6247	0.824928	0.803947	1.78671
	13.6313	0.89407	0.984192	2.11239
	13.638	0.98753	1.20544	2.46239
	13.6447	1.1096	1.46914	2.82288
	13.6513	1.26076	1.77383	3.17764
	13.658	1.44386	2.11334	3.50857
	13.6647	1.66082	2.47765	3.79801
	13.6713	1.90926	2.85292	4.02546
	13.678	2.18153	3.22247	4.17757
	13.6847	2.46954	3.56579	4.24671
	13.6913	2.76136	3.86238	4.23098
	13.698	3.04318	4.09508	4.13418
	13.7047	3.29924	4.24862	3.96395
	13.7113	3.51524	4.31633	3.7365
	13.718	3.67785	4.29678	3.46613
	13.7247	3.7775	4.19521	3.16954
	13.7313	3.80945	4.02069	2.8615
	13.738	3.77464	3.78656	2.55442
	13.7447	3.67785	3.50809	2.26259
	13.7513	3.52621	3.20291	1.99413
	13.758	3.33214	2.88677	1.75333
	13.7647	3.10898	2.57254	1.54114
	13.7713	2.86865	2.27356	1.3566
	13.778	2.62356	1.99747	1.19877
	13.7847	2.38323	1.74952	1.06525
	13.7913	2.15673	1.53017	0.954628
	13.798	1.94788	1.33944	0.862122
	13.8047	1.76144	1.17731	0.785351
	13.8113	1.6017	1.03998	0.721455
	13.818	1.46484	0.924587	0.669003
	13.8247	1.34897	0.828266	0.625134
	13.8313	1.25122	0.749111	0.58794
	13.838	1.17016	0.684738	0.555515
	13.8447	1.10292	0.630856	0.527382
	13.8513	1.04523	0.585556	0.50354
	13.858	0.997066	0.547886	0.483513
	13.8647	0.956535	0.517845	0.465393
	13.8713	0.921249	0.491142	0.44775
	13.878	0.890732	0.464916	0.42963
	13.8847	0.863075	0.439644	0.411987
	13.8913	0.83828	0.417233	0.394821
	13.898	0.816345	0.397682	0.379562
	13.9047	0.796318	0.379562	0.366211
	13.9113	0.779152	0.362396	0.355244
	13.918	0.765324	0.346661	0.34523
	13.9247	0.754356	0.333309	0.33617
	13.9313	0.745296	0.320911	0.328541
	13.938	0.73719	0.30899	0.321865
	13.9447	0.730038	0.296593	0.315666
	13.9513	0.723362	0.284672	0.309944
	13.958	0.716686	0.274658	0.304222
	13.9647	0.70858	0.266075	0.2985
	13.9713	0.699043	0.258923	0.293255
	13.978	0.689983	0.25177	0.288486
	13.9847	0.6814	0.245094	0.282764
	13.9913	0.673294	0.237942	0.276089
	13.998	0.665665	0.23222	0.270844
	14.0047	0.660419	0.226021	0.268936
	14.0113	0.657082	0.221252	0.268936
	14.018	0.654221	0.219345	0.269413
	14.0247	0.651836	0.218868	0.26989
	14.0313	0.649452	0.219822	0.27132
	14.038	0.647545	0.220776	0.273228
	14.0447	0.644207	0.222206	0.276566
	14.0513	0.641823	0.221729	0.280857
	14.058	0.640392	0.220776	0.284672
	14.0647	0.639915	0.221252	0.288486
	14.0713	0.640392	0.224113	0.293255
	14.078	0.6423	0.228405	0.299931
	14.0847	0.645638	0.232697	0.308037
	14.0913	0.650883	0.238419	0.31662
	14.098	0.657082	0.244617	0.32568
	14.1047	0.664711	0.25034	0.33474
	14.1113	0.673294	0.255108	0.344753
	14.118	0.683784	0.26083	0.354767
	14.1247	0.694752	0.268936	0.362396
	14.1313	0.704765	0.279427	0.370026
	14.138	0.715256	0.290394	0.378132
	14.1447	0.724792	0.300884	0.387669
	14.1513	0.733376	0.310898	0.397205
	14.158	0.741005	0.321388	0.406265
	14.1647	0.750542	0.330448	0.415802
	14.1713	0.762463	0.337601	0.426292
	14.178	0.776768	0.34523	0.439644
	14.1847	0.79298	0.353336	0.455856
	14.1913	0.808716	0.36478	0.47493
	14.198	0.824928	0.378132	0.495911
	14.2047	0.842571	0.394821	0.520706
	14.2113	0.861168	0.414848	0.546932
	14.218	0.880718	0.436306	0.573158
	14.2247	0.902176	0.458717	0.596046
	14.2313	0.926971	0.482559	0.616074
	14.238	0.955105	0.508785	0.633717
	14.2447	0.983715	0.534058	0.647068
	14.2513	1.01185	0.555992	0.653267
	14.258	1.03712	0.574112	0.651836
	14.2647	1.0581	0.58794	0.644207
	14.2713	1.07384	0.59557	0.630379
	14.278	1.08242	0.594139	0.609398
	14.2847	1.08242	0.585079	0.580788
	14.2913	1.07479	0.568867	0.548363
	14.298	1.06001	0.545979	0.514984
	14.3047	1.03855	0.517368	0.481129
	14.3113	1.0128	0.485897	0.44775
	14.318	0.982761	0.452042	0.418186
	14.3247	0.950813	0.417709	0.391006
	14.3313	0.917435	0.384331	0.366688
	14.338	0.88501	0.353813	0.344753
	14.3447	0.853062	0.326633	0.324249
	14.3513	0.820637	0.300407	0.306129
	14.358	0.788212	0.276089	0.288963
	14.3647	0.759125	0.255108	0.275135
	14.3713	0.733376	0.235558	0.264645
	14.378	0.709534	0.217438	0.257492
	14.3847	0.689507	0.201225	0.252247
	14.3913	0.673771	0.188828	0.247478
	14.398	0.662327	0.178814	0.242233
	14.4047	0.651836	0.170231	0.236511
	14.4113	0.641346	0.164032	0.231266
	14.418	0.632286	0.15974	0.225544
	14.4247	0.62418	0.156403	0.218868
	14.4313	0.615597	0.152588	0.212669
	14.438	0.607491	0.148296	0.209332
	14.4447	0.601292	0.145435	0.206947
	14.4513	0.596523	0.143051	0.204086
	14.458	0.591755	0.140667	0.201225
	14.4647	0.58794	0.137806	0.199795
	14.4713	0.585079	0.135422	0.199318
	14.478	0.583649	0.133038	0.199318
	14.4847	0.583172	0.13113	0.199318
	14.4913	0.582218	0.130177	0.200272
	14.498	0.582218	0.130653	0.201225
	14.5047	0.581741	0.13113	0.201225
	14.5113	0.581741	0.132561	0.201702
	14.518	0.580311	0.134945	0.202179
	14.5247	0.579357	0.136852	0.202656
	14.5313	0.577927	0.138283	0.203609
	14.538	0.57745	0.138283	0.205517
	14.5447	0.57745	0.139236	0.207901
	14.5513	0.57745	0.140667	0.209808
	14.558	0.57745	0.142574	0.208855
	14.5647	0.57888	0.144005	0.20647
	14.5713	0.581264	0.143051	0.205517
	14.578	0.582218	0.143051	0.204086
	14.5847	0.581264	0.143051	0.202179
	14.5913	0.581264	0.142574	0.200748
	14.598	0.580788	0.141144	0.200272
	14.6047	0.57888	0.140667	0.200748
	14.6113	0.575542	0.140667	0.199795
	14.618	0.574589	0.140667	0.197411
	14.6247	0.575066	0.14019	0.19598
	14.6313	0.576019	0.139713	0.195026
	14.638	0.57745	0.138283	0.193119
	14.6447	0.578403	0.136375	0.191689
	14.6513	0.580788	0.133991	0.190735
	14.658	0.583649	0.131607	0.190258
	14.6647	0.585556	0.128269	0.188828
	14.6713	0.585556	0.126362	0.18692
	14.678	0.584602	0.125885	0.186443
	14.6847	0.583649	0.125408	0.18692
	14.6913	0.582695	0.124931	0.18692
	14.698	0.580311	0.124931	0.186443
	14.7047	0.578403	0.125885	0.186443
	14.7113	0.57888	0.125885	0.187874
	14.718	0.579357	0.123501	0.188828
	14.7247	0.579357	0.121593	0.189304
	14.7313	0.577927	0.12064	0.187874
	14.738	0.575066	0.118256	0.185966
	14.7447	0.570774	0.114918	0.182629
	14.7513	0.566006	0.11158	0.178337
	14.758	0.56076	0.109196	0.172615
	14.7647	0.555992	0.106812	0.16737
	14.7713	0.553131	0.104427	0.163555
	14.778	0.552177	0.102043	0.161171
	14.7847	0.552654	0.100136	0.160694
	14.7913	0.553608	0.098705	0.161171
	14.798	0.554085	0.097275	0.161648
	14.8047	0.555038	0.094891	0.161648
	14.8113	0.555038	0.092506	0.161171
	14.818	0.553131	0.090599	0.15974
	14.8247	0.55027	0.089169	0.157833
	14.8313	0.545979	0.087738	0.155926
	14.838	0.542164	0.086308	0.153542
	14.8447	0.537872	0.085354	0.150681
	14.8513	0.535011	0.0844	0.14782
	14.858	0.533581	0.083923	0.144482
	14.8647	0.534058	0.082493	0.141621
	14.8713	0.536919	0.082493	0.13876
	14.878	0.540257	0.08297	0.136375
	14.8847	0.543118	0.08297	0.135422
	14.8913	0.544071	0.082493	0.136375
	14.898	0.544548	0.081062	0.138283
	14.9047	0.544548	0.079155	0.139713
	14.9113	0.545025	0.075817	0.140667
	14.918	0.545502	0.071526	0.141621
	14.9247	0.545025	0.067711	0.141144
	14.9313	0.545502	0.065804	0.140667
	14.938	0.545502	0.06485	0.139236
	14.9447	0.545502	0.063896	0.137806
	14.9513	0.545025	0.062943	0.136852
	14.958	0.545025		0.136852

## Sheet: Figure 3
A
	0 h			3 h			6 h			9 h			12 h			24 h
C	7.2	7.24	7.29	7.02	7.14	7.03	7.01	6.95	7.02	7.03	6.89	7.02	6.9	7	7.01	6.87	6.88	6.66
ST	6.8	6.69	7	6.51	6.33	6.43	5.66	5.21	5.38	5.25	5.38	5.33	5.29	5.35	5.4	5.48	5.09	5.25
RA	6.31	6.27	6.45	6.2	6.15	6.22	5.59	5.42	5.5	5.46	5.46	5.4	5.5	5.4	5.5	5.5	5.56	5.6
CC	7.12	7.13	7.21	6.58	6.7	6.69	5.43	5	5.05	4.9	4.7	4.7	4.6	5	4.9	4.5	5	4.82
PO	7.22	7.23	7.23	6.42	6.46	6.52	4.64	4.61	4.63	4.27	4.25	4.24	4.13	4.12	4.12	3.99	3.98	3.98
B
	Acetic acid			Propionic acid			Isobutyric acid			Butyric acid			Isovaleric acid			Valeric acid
3 h	0	0	0	0.114496	0.150086	0.140384	0	0	0	0.110042	0.120088	0.118808	0.016467	0.017285	0.016877	0.02156	0.021786	0.022083
6 h	0	0	0.458966	0.116757	0.183236	0.188411	0	0	0	0.10659	0.17788	0.165484	0.016036	0.023493	0.022531	0.019644	0.02161	0.021897
9 h	1.97596	2.1116	1.87615	0.462874	0.858728	0.772644	0.01808	0.024483	0.019939	0.413211	0.770553	0.553847	0.031554	0.052147	0.040704	0.028972	0.033092	0.030279
12 h	2.29243	2.68299	1.98329	0.386236	0.927654	0.798587	0	0.028214	0.021988	0.283948	1.02582	0.598941	0.023712	0.061895	0.044692	0.025744	0.037541	0.03427
24 h	2.50875	4.5812	6.10447	0.466399	1.37973	0.960235	0.017674	0.043765	0.024989	0.361589	2.3592	1.70437	0.030253	0.104068	0.051792	0.02903	0.059579	0.041421
3 h	0	0	0	0.122924	0.132458	0.127366	0	0	0	0.120945	0.13509	0.123257	0.015317	0.016392	0.016128	0.020182	0.020644	0.020974
6 h	0.613303	0.728727	0.728655	0.202994	0.396599	0.428412	0	0	0	0.140627	0.221935	0.215457	0.01682	0.019334	0.017514	0.021432	0.026681	0.023654
9 h	4.54911	4.62589	5.09079	2.44609	2.70685	2.7353	0	0.017643	0	0.639021	0.753394	0.637198	0.031333	0.032522	0.027682	0.070774	0.089591	0.047612
12 h	5.13749	5.16912	6.81242	4.40847	3.81659	6.06457	0.028256	0.029873	0.036141	2.47804	1.66184	3.36584	0.055508	0.05673	0.072921	0.661938	0.360221	0.898657
24 h	2.05238	2.52701	5.5237	0.908014	1.28413	4.23425	0.277619	0.248669	0.043169	11.9978	11.2278	2.19153	0.535767	0.496418	0.082233	5.30528	5.1557	0.668824
3 h	0	0	0	0.140408	0.12795	0.121972	0	0	0	0.118776	0.103262	0.103818	0.014707	0.013956	0.01429	0.020589	0.019856	0.020322
6 h	0.655711	0.60376	0.738783	0.356489	0.309862	0.470399	0	0	0	0.16222	0.143714	0.169881	0.017228	0.01651	0.016225	0.025867	0.023813	0.023494
9 h	4.22856	5.15339	5.84098	2.86106	3.72368	3.88352	0	0	0	0.536756	0.688133	0.600375	0.036409	0.030472	0.032029	0.075965	0.100953	0.060267
12 h	5.66371	4.89887	5.68792	4.2602	3.55976	4.00123	0.056429	0.042095	0.021551	4.45349	2.04421	0.931067	0.143937	0.088999	0.039915	1.5853	0.653516	0.162728
24 h	2.41948	2.85096	4.57557	1.05001	1.03579	3.12894	0.259342	0.241366	0.119012	11.2415	11.3125	6.59305	0.508337	0.496617	0.287622	4.63989	4.15023	2.60113
3 h	0	0	0	0.16243	0.145904	0.134238	0	0	0	0.198221	0.13688	0.117354	0.020485	0.015967	0.015223	0.024551	0.020901	0.020187
6 h	0.636298	0.691027	0.691316	0.246905	0.276698	0.255586	0	0	0	0.262635	0.309623	0.270721	0.018392	0.019636	0.018062	0.023774	0.024931	0.023512
9 h	4.62752	4.89696	5.61292	1.27788	1.98149	1.08423	0	0.019164	0	0.842003	0.820133	0.663157	0.026947	0.032789	0.024664	0.032173	0.047379	0.030181
12 h	4.88234	4.69515	6.81571	2.12574	2.93405	1.85729	0	0.030045	0.021256	1.00862	2.6088	1.24812	0.03056	0.058326	0.037641	0.038716	0.441713	0.106347
24 h	1.60796	1.89651	1.84122	0.329447	0.395011	1.19673	0.261771	0.329432	0.255548	10.8395	13.6929	12.2221	0.526518	0.665227	0.493828	4.26931	5.40813	6.15517
3 h	0.570442	0.479425	0	0.183621	0.176021	0.174402	0	0	0	0.204089	0.189694	0.188209	0.018094	0.017669	0.018798	0.021411	0.021018	0.021782
6 h	0.81086	0.913769	0.819474	0.303688	0.347101	0.308945	0	0	0	0.404466	0.445711	0.388392	0.020191	0.021386	0.019384	0.02332	0.02409	0.022643
9 h	7.99287	8.2353	8.51656	1.25242	1.28088	1.31395	0	0	0	0.943059	0.942082	0.966873	0.027248	0.027702	0.027745	0.028211	0.027966	0.028142
12 h	10.2508	11.3558	11.1691	1.41165	1.53581	1.49366	0.019419	0.020434	0	1.10661	1.1589	1.11832	0.029726	0.031771	0.030478	0.030772	0.031628	0.031031
24 h	12.9593	13.4999	13.3371	1.32653	1.40626	1.36003	0.212604	0.168311	0.192334	15.3683	14.4217	15.2843	0.451546	0.383379	0.432641	1.84792	1.57536	1.72862

## Sheet: Figure 4
B
C0	ST12	RA12	CC12	PO12	C12	ST24	RA24	CC24	PO24	C24
3.74744	1.80655	1.57802	1.82849	2.01002	1.87455	1.58983	1.7625	1.8551	2.12567	2.47345
3.84076	1.19049	2.04419	1.7472	1.97762	2.18531	1.66753	1.8107	1.89096	2.02894	2.63009
3.94488	1.02434	2.11945	1.33569	2.14342	3.24005	1.2691	2.26875	1.79407	2.12915	1.78042
C
C0	ST12	RA12	CC12	PO12	C12	ST24	RA24	CC24	PO24	C24
336.838	170.086	102.053	171.652	188.955	199.808	71.3	174.107	123.833	176.125	144.469
308.5	145.417	103.062	164.207	180.24	215.333	102.353	87.125	93.5455	159.526	172.235
330.324	146.667	270.714	133.062	202.1	251.897	123.417	185.353	132.071	183.484	141.4
D
C0	ST12	RA12	CC12	PO12	C12	ST24	RA24	CC24	PO24	C24
20.0621	2.62059	2.91739	2.32117	3.19684	2.22399	3.89587	3.89763	3.88573	3.65393	7.844
21.0875	1.63003	3.66405	2.32935	3.29797	2.95696	3.89043	4.46611	4.83107	3.51598	8.47923
22.8509	1.48746	2.4067	1.6811	3.47823	7.07167	1.80048	4.60047	2.77622	3.70972	2.70464
E
C0	ST12	RA12	CC12	PO12	C12	ST24	RA24	CC24	PO24	C24
339.463	171.141	102.77	173.832	250.279	201.764	71.9424	175.067	124.609	220.206	147.224
311.086	146.813	103.637	165.529	249.063	254.11	103.385	87.5496	94.5439	215.798	174.031
332.301	148.127	272.262	133.667	246.285	254.11	125.469	186.154	133.133	200.905	174.031
F					G
sample	V1	V2			sample	MDS1	MDS2
C0_1	0.377343	-0.607478			C0_1	-0.708924	0.0765388
C0_2	0.390977	-0.597728			C0_2	-0.712198	0.0601703
C0_3	0.384749	-0.601835			C0_3	-0.709489	0.0529911
ST12_1	0.0450734	0.10743			ST12_1	0.0391708	-0.0414392
ST12_2	0.119079	0.173927			ST12_2	0.0519619	-0.0960023
ST12_3	0.133175	0.190428			ST12_3	0.0643767	-0.132091
RA12_1	-0.186518	0.086518			RA12_1	0.118611	0.028106
RA12_2	-0.207298	-0.0884332			RA12_2	0.0470669	0.13445
RA12_3	0.0954431	0.177791			RA12_3	0.084837	-0.100706
CC12_1	0.106826	0.137573			CC12_1	0.0367965	-0.0661495
CC12_2	0.0198551	0.114028			CC12_2	0.0549258	-0.042907
CC12_3	0.128683	0.217711			CC12_3	0.0606575	-0.120899
PO12_1	0.181178	0.137792			PO12_1	0.0093647	-0.0956496
PO12_2	0.174483	0.139497			PO12_2	0.0195088	-0.096461
PO12_3	0.221071	0.155229			PO12_3	0.00912887	-0.122754
C12_1	0.157155	0.129919			C12_1	-0.0236897	-0.0979607
C12_2	0.168332	0.159396			C12_2	0.00398543	-0.107728
C12_3	0.134806	-0.00392601			C12_3	-0.142836	-0.0102892
ST24_1	-0.438067	-0.147217			ST24_1	0.236238	0.161538
ST24_2	-0.339785	-0.0432838			ST24_2	0.18617	0.1092
ST24_3	0.0186308	0.179326			ST24_3	0.0938576	-0.0734824
RA24_1	-0.311217	0.0051158			RA24_1	0.194969	0.0712626
RA24_2	-0.445348	-0.17667			RA24_2	0.204482	0.188928
RA24_3	-0.317387	-0.0766542			RA24_3	0.111466	0.155523
CC24_1	-0.228376	0.0316276			CC24_1	0.129552	0.0626748
CC24_2	-0.342555	-0.0458822			CC24_2	0.186711	0.116867
CC24_3	-0.0932032	0.112757			CC24_3	0.0875679	-0.00560665
PO24_1	0.21116	0.147788			PO24_1	0.0100511	-0.124
PO24_2	0.186137	0.145878			PO24_2	0.0186521	-0.108056
PO24_3	0.177674	0.118142			PO24_3	0.0113257	-0.0904431
C24_1	-0.386512	-0.246717			C24_1	0.110456	0.249405
C24_2	-0.248784	-0.265368			C24_2	0.0197031	0.25061
C24_3	0.113219	0.233318			C24_3	0.0955434	-0.185639

## Sheet: Figure 5
A
	Actinobacteriota	Proteobacteria	Firmicutes	Bacteroidota	Other
C0	4.31694	9.46545	83.0913	2.86731	0.259035
ST12	1.83461	0.217545	18.6916	79.2108	0.045473
RA12	3.86704	3.87431	33.6813	58.346	0.231414
CC12	5.46854	1.63868	18.2083	74.6269	0.057656
PO12	7.71457	3.50444	33.6674	55.0143	0.099274
C12	0.373188	6.00969	33.7528	59.4218	0.442512
ST124	0.807541	0.030542	51.3781	47.75	0.033799
RA24	1.44488	2.51199	61.21	34.6768	0.15632
CC24	3.15374	0.456545	48.5984	47.7487	0.042637
PO24	9.94592	4.51454	33.9126	51.5669	0.06003
C24	0.33673	0.782801	59.7955	38.996	0.089023
B
	g_Agathobacter	g_Dialister	g_Bacteroides	g_Subdoligranulum	g_Bifidobacterium	f_Enterobacteriaceae; g_	f_Selenomonadaceae; g_	g_Ruminococcus	g_Lachnospira	g_Phascolarctobacterium	g_Collinsella	g_Blautia	g_Dorea	f_Lachnospiraceae; g_	g_Parabacteroides	g_Alistipes	g_Veillonella	g_Bilophila	g_Butyricicoccus	g_Lactobacillus
C0	0.793879	46.7921	0.294561	6.48754	1.92183	5.52482	4.04842	1.87513	0.287377	8.90509	0.765141	4.07716	6.63841	4.89259	1.50154	2.10863	0.172426	0.880092	2.01164	0.021553
ST12	2.3534	10.0213	42.903	7.47823	14.5307	2.37662	2.3534	3.5959	0.193536	4.61777	1.05283	2.30695	0.309657	3.06948	0.139346	0.479969	0.073544	0.317399	0.154829	1.67215
RA12	0.644567	17.1271	1.82224	12.2226	25.0363	5.04507	5.74295	3.17922	0.029078	11.8639	3.93041	5.70902	0.150237	3.10168	0	0.019385	0.130852	0.431327	0.024232	3.78986
CC12	0.281345	10.6845	7.53674	5.66662	36.4789	8.71508	9.46313	1.25778	1.6318	4.15067	2.7307	3.18417	0.148947	3.31325	2.36992	1.77082	0.066199	0.291275	0.165497	0.092678
PO12	1.47737	5.68767	10.9006	7.31367	36.4042	10.6677	5.21517	0.831855	0.488021	1.74578	4.0417	4.9268	0.090949	2.27817	5.4126	1.49068	0.048802	0.439219	0.470275	0.068767
C12	0.769421	10.923	16.8668	0.563326	1.29977	15.589	26.8143	0.634772	0	1.66525	1.12665	1.54434	0.739194	16.0232	0.719958	1.42068	0.178616	2.5968	0.524855	0
ST24	1.21133	32.1656	12.122	11.1373	14.2745	2.64052	6.16122	0.740741	0.191721	1.20261	0.723312	2.71895	0.235294	2.31808	0.052288	0.392157	0.052288	0.566449	0.017429	11.0762
RA24	0.127314	17.1715	0.164447	5.72914	11.1983	2.96536	2.66829	0.997295	0.01061	3.18816	1.02912	3.09798	0.074267	1.93624	0	0	0.10079	0.2228	0	49.3183
CC24	0.011194	16.4782	3.6382	2.60831	37.4062	9.04511	10.1814	0.106347	0.335833	7.79693	0.761222	2.26688	0.033583	1.55603	0.755625	1.17542	0.083958	0.458972	0.016792	5.28378
PO24	1.19666	2.64319	15.6405	8.52106	42.699	8.08769	3.42209	0.240112	0.17374	1.43872	3.21712	5.52259	0.06442	1.46801	3.84375	1.17714	0.009761	0.247921	0.294772	0.09175
C24	7.81902	34.5492	2.17136	2.07509	5.85089	13.3811	16.3654	0.770136	0.609691	2.78105	0.802225	2.71687	0.866403	1.00545	1.26217	2.23553	0.342283	1.52957	0.427853	2.43876

## Sheet: Figure 6
A
	C			PL			PG			EA
0	6.06899	6.14046	6.11847	6.35212	6.0525	6.33837	6.14321	6.19819	6.16245	6.03601	6.47856	6.08274
3	7.66328	7.52227	7.66603	7.74574	7.70176	7.54233	7.76223	7.85844	7.87493	7.51484	7.6138	7.52584
6	7.6083	7.6083	7.77323	7.7265	7.69351	7.6138	7.56432	8.14706	7.67977	7.81446	7.63579	7.7265
12	7.68252	7.81996	7.66877	7.70176	7.70176	7.73474	7.7155	7.9519	7.60006	7.72925	7.76773	7.69901
24	7.73474	7.59181	7.64678	7.72375	7.76498	7.85294	7.56982	7.34992	7.56432	7.67152	7.89142	7.33892
B
	C			PL			PG			EA
0	6.42938	6.60273	6.5601	6.79028	6.86417	6.83575	6.72492	7.38136	6.67377	6.44928	6.65956	6.64251
3	7.74226	7.67974	7.2478	7.1796	7.20233	7.23643	7.09719	7.16539	7.31032	6.58284	6.72776	6.8528
6	7.72236	7.67406	7.66553	7.20517	7.66553	7.26485	7.27053	7.29895	7.18812	7.2819	7.24211	6.90395
12	7.21938	7.48934	7.29042	7.53765	7.6428	7.68826	7.42967	7.61438	7.81046	7.54049	7.02899	7.4865
24	6.82438	7.06877	7.08582	8.27366	8.31344	8.62887	8.07189	8.29071	8.26797	8.12021	8.45269	8.42995
C
	C			PL			PG			EA
0	6.46989	6.5497	6.60532	6.50375	6.53035	6.58597	6.50859	6.51826	6.49407	6.33688	6.65853	6.44087
3	7.7468	7.71052	7.74196	8.31753	7.71536	8.00073	8.59323	8.71415	8.32721	6.82539	6.79637	8.33204
6	6.5497	7.1688	6.85925	6.91971	6.92938	6.92455	8.35139	7.69117	7.63797	6.66578	6.68029	6.71415
12	6.73349	6.74559	6.70206	6.79154	6.75768	6.77461	6.76735	8.02975	7.78549	6.46505	6.53519	6.57146
24	6.58597	6.56421	6.55695	6.50859	6.61741	7.77098	6.64643	6.64643	6.68996	6.2474	6.32237	6.27642
D
	C			PL			PG			EA
0	5.58672	5.67831	5.66113	5.66686	5.72982	5.68403	5.47224	5.60103	5.38638	5.42931	5.6411	5.68975
3	6.55982	6.55123	6.56268	7.60447	7.27819	6.4854	6.47109	6.57413	7.48426	6.45106	6.34802	6.45392
6	5.77562	6.00172	5.92158	6.32799	6.40527	6.55409	6.32227	6.42816	6.3423	6.11906	6.26503	6.12479
12	5.67258	5.72982	5.87579	6.21065	6.12765	6.21351	6.12479	6.15341	6.02748	5.4751	5.60103	5.71265
24	5.60962	5.64968	5.66972	5.57241	5.68975	5.73555	5.6182	5.75844	5.72696	5.09159	5.11448	5.11448
E
	C			PL			PG			EA
0	6.40795	6.40079	6.29692	6.22887	6.67658	6.55838	6.55838	6.55122	6.48675	6.54047	6.50466	6.32557
3	6.476	6.42228	6.41512	6.92729	6.76254	6.75895	6.92371	6.75895	6.68732	7.46096	6.83775	6.76612
6	7.64004	6.28259	6.13575	6.70523	6.6515	6.476	7.4932	6.77328	6.69807	6.48675	6.41153	6.57271
12	6.3793	6.33632	6.2611	6.57271	6.5548	6.54405	6.31841	6.21096	6.19305	6.13216	6.0462	5.774
24	6.20738	6.19663	6.125	6.27543	6.23603	6.14649	6.38646	6.18589	6.1644	6	5.8164	5.65136
F
	C			PL			PG			EA
0	6.82204	7.00614	6.74114	6.93361	6.91688	6.94198	6.95035	6.85551	6.95872	6.67699	7.15676	6.93919
3	6.71883	6.74114	6.71604	7.68954	6.97266	7.03124	6.97824	7.76764	8.37573	7.46639	6.94756	7.45802
6	6.48173	6.59052	6.66304	6.71604	6.92246	6.91688	6.95593	7.36318	6.97266	6.69093	6.78856	6.77741
12	6.63794	6.66304	6.74672	6.8834	6.9894	6.90014	6.66025	6.62678	6.66583	6.29205	6.39805	6.5682
24	6.58773	6.57099	6.59052	6.56262	6.6212	6.72441	6.60446	6.68814	6.74393	6.05495	6.12748	6.07169
G
	C			PL			PG			EA
0	4.87382	4.96534	4.99029	5.09567	5.19273	5.15114	4.97365	4.98752	4.93483	4.6797	4.91542	4.92651
3	5.8056	5.84997	5.84443	5.75291	5.7335	5.70299	5.5782	5.66417	5.73627	5.5782	5.49778	5.67249
6	6.67083	7.1284	6.82612	6.88159	7.23378	6.49334	6.90655	6.41292	6.4462	6.32695	6.36578	6.36023
12	7.10344	7.06739	6.8289	6.50721	6.57654	6.5294	6.52108	6.52662	6.47116	6.14947	6.57377	6.36023
24	7.01192	7.13117	6.93428	6.1772	6.302	6.2188	6.36855	6.3741	6.46561	5.98308	6.08846	6.05796
H
	C			PL			PG			EA
0	3.87738	3.92497	3.92777	3.84938	3.95297	3.92777	3.84938	3.93897	3.90258	3.82979	3.95297	3.98096
3	4.73684	4.71165	4.72284	4.50448	4.53247	4.58567	4.3561	4.42329	4.48768	4.3757	4.40369	4.45689
6	4.72004	4.91881	4.84882	4.69485	4.74244	4.74524	4.74524	4.77883	4.68645	4.68365	4.68645	4.73684
12	5.88746	5.89026	5.90705	6.09183	5.97704	6.08343	6.13102	6.05823	6.03863	5.84267	5.83707	5.95745
24	6.70493	6.76652	6.77212	7.86954	8.70661	8.7374	7.36002	7.486	7.43001	8.89978	8.61702	8.81299
I
	C			PL			PG			EA
0	1.55362	1.33115	1.46806	1.02881	1.34826	1.62208	1.44238	1.55077	1.16286	1.34541	1.49658	1.25984
3	2.82858	2.89989	2.83714	2.50913	2.54335	2.45493	1.53651	1.35397	1.35967	2.27524	2.11837	2.2182
6	2.68026	2.91129	2.76298	2.33514	2.29521	2.44638	1.26554	1.71905	1.39675	2.24672	2.2182	2.06988
12	2.48916	2.45779	2.48346	2.42641	2.36937	2.43212	1.37963	1.45094	1.30262	1.92156	2.19823	2.29521
24	2.19538	2.12978	2.36366	1.59355	1.89589	1.66771	1.83314	1.9016	1.77325	2.02995	2.00713	2.14689
J
	C			PL			PG			EA
0	7.23157	7.54839	7.3583	7.67511	7.7068	7.41302	7.53399	7.64631	7.46198	7.24309	6.96083	7.52823
3	8.15323	8.24539	8.34044	8.10426	8.1417	8.35772	8.08122	8.07258	8.18779	8.13307	7.95161	8.1273
6	7.97753	8.31452	8.27419	8.0265	8.38076	8.28571	8.1417	8.23099	8.1273	8.21083	8.24251	8.04378
12	8.29148	8.14458	8.32316	8.27131	8.32028	8.24539	8.08698	8.23099	8.28859	8.02362	8.31452	8.16475
24	8.30876	8.31164	8.22235	8.28571	8.49309	8.56221	8.27419	8.22811	8.38652	8.16187	8.13018	8.49597

## Sheet: Figure 7
A	A
	Control		ST		RA		CC		PO
Signaling Molecules and Interaction	0.00272833	0.00107074	0.00159489	0.000258541	0.00191096	0.000172505	0.00169318	0.000220535	0.00180722	1.0799e-05
Metabolism of Cofactors and Vitamins	0.0363897	0.00241066	0.0439737	0.00684263	0.0444688	0.00217845	0.0409174	0.00118366	0.031584	0.000208957
Enzyme Families	0.0246698	0.000850826	0.0222605	0.000705241	0.0249531	0.000113698	0.0223091	0.00037592	0.0217087	0.000995042
Glycan Biosynthesis and Metabolism	0.0239343	0.00174129	0.0307002	0.00289468	0.0302495	0.00114418	0.0286615	0.000826528	0.022202	0.000105509
Metabolism of Other Amino Acids	0.0161482	0.000421166	0.0168171	0.000498189	0.0170208	0.000188127	0.0166271	0.000122586	0.0155674	3.93559e-05
Immune System Diseases	0.000549468	3.16311e-05	0.000254709	0.000140571	0.000302402	7.97389e-05	0.000316682	3.0226e-05	0.000482401	2.4181e-06
Lipid Metabolism	0.0275158	0.0013779	0.022344	0.00132913	0.0226915	0.000699681	0.0237029	0.000894578	0.0258941	0.000147484
Carbohydrate Metabolism	0.101147	0.00136134	0.0980041	0.00260615	0.100137	0.00133699	0.107939	0.000516435	0.0973841	0.000658692
Endocrine System	0.00175389	8.08025e-05	0.00216992	0.000266181	0.00223544	3.87753e-05	0.00208446	0.000132502	0.00249356	1.04575e-05
Genetic Information Processing	0.0316368	0.000390189	0.0351352	0.000305734	0.0342197	0.000540092	0.0343841	0.000401695	0.0313306	0.000138235
B	B
	Control		ST		RA		CC		PO
Amino sugar and nucleotide sugar metabolism	0.0136037	0.000491385	0.0108475	0.000711376	0.0116374	0.000288022	0.0114625	0.000943376	0.0159211	0.000251459
Energy metabolism	0.00812283	0.00152903	0.0116132	0.000540326	0.0110772	0.000526373	0.0104283	0.000637508	0.00881111	2.97608e-05
Fructose and mannose metabolism	0.00878966	0.00122715	0.00701805	0.000262721	0.00728665	0.000217752	0.0104886	0.000192993	0.00736712	0.000225515
Inositol phosphate metabolism	0.00115921	0.000368591	0.000642123	5.89779e-05	0.000661922	7.31403e-05	0.000766579	2.88953e-05	0.000871432	1.35268e-05
Methane metabolism	0.00923597	9.65177e-05	0.00859669	0.000318985	0.00889504	0.000192994	0.00852537	5.62811e-05	0.00960526	2.63771e-05
Primary bile acid biosynthesis	0.000349301	0.000122735	1.67424e-05	1.16584e-05	3.89994e-05	1.82575e-05	8.59034e-05	5.44787e-05	0.000282254	7.017e-06
Retinol metabolism	0.000269542	3.22881e-05	0.000451575	2.88015e-05	0.000413289	3.0907e-05	0.000392337	3.35922e-05	0.000228852	6.847e-06
Secondary bile acid biosynthesis	0.000349301	0.000122735	1.67424e-05	1.16584e-05	3.89808e-05	1.82474e-05	8.59034e-05	5.44787e-05	0.000282254	7.017e-06
Starch and sucrose metabolism	0.00881369	0.00033969	0.00774964	0.000150235	0.0082903	0.000246414	0.0104078	4.85538e-05	0.00805636	0.000198089
Vitamin B6 metabolism	0.00168209	0.000214558	0.00205117	1.40902e-05	0.00206371	5.72356e-05	0.00215633	4.45647e-05	0.00196376	1.15656e-05

## Sheet: Table 2
	EA					Uro-M5				Uro-M6				Uro-C				Uro-A
	0	6	12	24		6	12	24		6	12	24		6	12	24		6	12	24
ST	31.6926	12.3132	10.4633	10.2651		0	1.1456	1.88784		0	0	0.6		2.54554	2.61279	0.8		0	0.704808	1.03651
	17.1581	13.1941	11.7847	11.4103		0	0.6	1.83823		0	0	0.996311		2.68751	2.65015	0.9		0	0.8	1.05928
	28.6095	13.6345	10.0449	9.91279		0	0.55	1		0	0	0.4		2.34379	2.5829	0.643794		0	1.09636	0
	EA					Uro-M5				Uro-M6				Uro-C				Uro-A
	0	6	12	24		6	12	24		6	12	24		6	12	24		6	12	24
RA	16.9378	14.075	11.1681			0	0	0		0	0	0		2.62774	2.59038	2.63521		0	0	1.0866
	16.0569	15.3963	14.075			0	0	0		0	0	0		2.65763	2.60532	2.30643		0	0	1.20497
	15.3963	12.3132	11.4323			0	0	0		0	0	0		2.65015	2.49324	2.55302		0	0	1.11391
	EA					Uro-M5				Uro-M6				Uro-C				Uro-A
CC	0	6	12	24		6	12	24		6	12	24		6	12	24		6	12	24
	8.52941	7.00088	3			0	0	0		0	0	0		2.34379	2.72487	2.41852		0.5	1.05017	0.959115
	7.08897	8.0229	4.93481			0	0	0		0	0	0		2.49324	2.3961	2.2616		0.3	1.0957	1.11391
	5	5	2			0	0	0		0	0	0		2.67257	2.45588	2.37368		0.38676	1.03834	0.959115
	EA					Uro-M5				Uro-M6				Uro-C				Uro-A
	0	6	12	24		6	12	24		6	12	24		6	12	24		6	12	24
PO	9.8159	4.5	3.3222			0.9	0	0		0	0.703271	0		2.52313	2.74729	2.50818		0.295866	1.04107	1.96075
	10.0009	7.89077	3.3			0.8	0	0		0	0.89	0		2.53807	2.34379	2.42599		0.35	1.13213	1.62384
	10.2872	7.9193	4.7			0.582419	0	0		0	0.41	0		2.47082	2.88179	3.22551		0.55	1.04107	1.57831

## Sheet: Figure S1
A					B					C					D
Time	Intensity	Intensity	Intensity		Time	Intensity	Intensity	Intensity		Time	Intensity	Intensity	Intensity		Time	Intensity	Intensity	Intensity
0.003367	2000	2491	2900		0.003367	2912	2489	800		0.003367	3000	800	3186		0.003367	2800	2800	3700
0.00735	4426	3513	4141		0.007567	4258	3326	4093		0.00735	4288	4187	3662		0.007333	2763	3619	3808
0.011367	6040	5933	5510		0.01175	6577	6157	5431		0.01135	6063	6406	5835		0.01135	5551	5572	5906
0.015383	9250	9080	8029		0.015767	8290	8333	8629		0.01535	8674	9430	8543		0.015333	8233	8956	7937
0.019417	12563	12143	12187		0.020083	11785	12344	12723		0.019367	12780	12222	11934		0.019333	12467	11353	11303
0.023467	12231	13094	12602		0.024217	12765	12148	12961		0.023417	13092	12528	12780		0.023383	11595	12039	12134
0.027567	13308	12667	12211		0.02865	12291	12633	12954		0.027483	13145	13107	12055		0.027433	12161	12105	11991
0.031633	13030	12790	12530		0.0328	12626	12810	12552		0.031533	13273	12737	12850		0.0315	11817	12955	12148
0.0357	12820	11975	11607		0.036933	12372	12596	13034		0.0356	12578	11843	12674		0.03555	12480	12436	12329
0.039767	12433	12266	12738		0.0411	12544	13540	12784		0.039683	12447	12473	12174		0.0396	11636	12201	12337
0.04385	12779	12254	12082		0.045283	12315	11874	12777		0.043717	12679	13083	12320		0.04365	12187	11428	12161
0.047917	12369	13149	12145		0.049467	12668	12446	13011		0.047783	12646	12370	12118		0.047717	11497	11971	12165
0.05195	12476	12266	13126		0.053567	12208	12552	12986		0.051867	12272	12524	11947		0.05175	12279	12246	11932
0.056017	12843	12339	12947		0.057767	12554	13026	12551		0.0559	12380	13241	12595		0.055783	11971	11516	11944
0.060067	13000	13050	12707		0.0618	12520	12639	12277		0.059967	13021	12476	12254		0.059833	11879	12436	12275
0.06415	12386	12158	12251		0.066	12331	12446	12340		0.064033	13181	12166	12558		0.063883	11308	11995	12458
0.068217	13486	12824	12468		0.07005	12064	12711	12943		0.0681	12808	12414	13398		0.067933	12349	11959	12396
0.0723	12763	13310	12584		0.0744	12317	13128	13241		0.072183	12856	12895	12740		0.071983	12101	12686	12245
0.076367	12614	12695	12282		0.078467	11924	12802	12797		0.07625	12770	12198	12507		0.076033	11979	12155	11698
0.080417	13182	12589	12399		0.082583	12023	13271	12473		0.0803	12822	12487	12358		0.0801	12204	12001	12935
0.084483	12195	12684	12409		0.086667	12037	13175	13064		0.084367	12731	12553	12349		0.08415	12197	12459	11950
0.088533	12488	12959	13240		0.09085	11776	12804	11948		0.088433	12172	12709	12404		0.088217	12234	12324	11934
0.0926	13012	13050	12654		0.0952	12223	13059	12712		0.092483	12303	12542	12372		0.092267	11898	12415	12658
0.09665	12426	12844	12420		0.0994	11852	12431	12442		0.096533	12485	12027	11994		0.096317	11439	12461	12141
0.1007	12894	12744	12450		0.103583	12721	12645	12617		0.1006	12261	12227	12523		0.100383	11830	11300	11015
0.104767	12846	12332	11798		0.107717	12281	12936	12686		0.104683	12832	12278	12480		0.104433	10771	11701	12777
0.108833	12618	12730	12098		0.1119	11872	12748	12485		0.10875	12189	12752	12797		0.108483	12043	11869	11854
0.1129	12930	12731	11951		0.116233	11723	12212	12779		0.112817	12335	11490	12257		0.11255	12204	11938	12052
0.116967	12105	12350	12303		0.1203	12188	12595	12636		0.116883	12589	12099	12353		0.1166	12209	12083	11867
0.121033	12426	12398	12203		0.1246	12721	12637	12591		0.12095	12511	12136	12425		0.12065	11428	11680	11783
0.1251	12518	11664	12823		0.128783	12044	12371	13072		0.125017	12522	12821	12049		0.124683	11651	12322	12185
0.129167	12846	12262	12255		0.133233	12399	12588	12926		0.1291	12107	12580	12497		0.12875	12142	11989	12586
0.133233	12665	12388	12590		0.13735	11991	12823	12913		0.13315	12088	12252	12367		0.1328	11724	11500	11874
0.1373	13041	12755	12263		0.141683	12001	12596	12746		0.137233	12162	12139	12561		0.136867	12176	12110	12623
0.141367	12752	12448	12541		0.145867	12270	12369	12311		0.141283	12348	12081	12258		0.1409	12402	11428	12665
0.145433	12410	12765	12566		0.150067	12089	12637	12473		0.14535	12401	11727	12510		0.14495	11834	11876	11730
0.1495	12600	12230	12625		0.154283	12074	12561	12931		0.149433	12642	12403	12549		0.149017	11340	11849	12499
0.153583	13350	12337	13106		0.158467	12251	13191	12804		0.1535	12154	11703	12155		0.153067	11685	11382	12175
0.15765	11963	11785	12225		0.1629	11939	12346	12563		0.157567	12878	12836	11974		0.157133	11138	11764	12447
0.161717	12133	12076	11760		0.1671	12763	12449	12977		0.1616	12055	12145	12833		0.161167	11564	12016	12080
0.165783	12330	12398	11888		0.171417	12139	12351	12076		0.16565	12075	12016	12345		0.165217	11332	12013	12130
0.169867	12664	12251	12127		0.175467	11944	11542	12300		0.169683	12214	12082	11852		0.169267	11632	12344	11673
0.173933	11959	12498	13044		0.179667	11447	11627	12116		0.17375	12451	12083	12474		0.173333	11724	10948	11601
0.178	12384	12165	12406		0.183967	12414	12138	12194		0.1778	12933	11908	12432		0.177383	11183	11654	12218
0.182083	11903	12305	12569		0.188067	11515	12818	12480		0.181867	12781	12283	12580		0.18145	11771	11372	11828
0.18615	12468	12566	11974		0.192183	11572	12482	12676		0.185933	12390	11701	12475		0.1855	11422	12271	12116
0.190217	11674	11499	11789		0.196433	12571	12493	12123		0.189983	12685	12395	12288		0.189567	11773	11515	11884
0.194283	12379	12352	11805		0.200533	11625	12245	12363		0.19405	12666	12020	12202		0.193633	11049	11671	11823
0.19835	11994	12374	12355		0.204667	12048	11982	12532		0.198133	12297	12021	12219		0.197683	11844	11481	11698
0.202433	12513	12139	11780		0.208717	11614	12172	12299		0.2022	12642	12653	11756		0.201717	11206	12518	11976
0.206483	11864	12145	12199		0.21285	11691	12198	11908		0.206233	12232	12165	12265		0.205767	11392	12274	11995
0.210533	11996	12236	12379		0.217033	11784	12212	12752		0.210283	12205	11720	12145		0.209817	10921	11961	11256
0.2146	11946	12529	12695		0.2211	11801	12026	11925		0.21435	12046	12060	12509		0.213867	11696	12058	11397
0.21865	12288	12095	11949		0.225267	11684	12707	12585		0.2184	12273	12131	12620		0.217933	11456	11665	11917
0.222717	11745	12193	12219		0.229583	11220	12032	11776		0.222467	12103	12399	12503		0.221983	11773	11395	12264
0.226783	11976	11854	12313		0.233767	11681	11964	12034		0.226533	11888	11505	11484		0.226033	11803	11172	11185
0.230833	12247	11464	11940		0.238083	11656	12253	12489		0.230583	12287	11960	12608		0.230083	11242	12031	11049
0.2349	12345	11511	11834		0.242267	12011	11717	12114		0.234633	12320	11974	12595		0.234133	12187	11935	12060
0.238967	11376	12201	12184		0.246333	12142	12068	12277		0.238683	11859	12455	12456		0.238183	11563	11603	11704
0.243033	12144	11564	12295		0.250517	12389	12094	12441		0.24275	12302	12418	11875		0.24225	11284	11928	11335
0.2471	12824	12048	11647		0.254633	11762	12110	12236		0.246833	12081	12363	12084		0.2463	11545	11660	11485
0.251167	11734	12204	12280		0.259167	12005	11885	11889		0.2509	11932	12179	11858		0.25035	11174	12016	11534
0.255233	12176	12061	12044		0.263367	10909	12822	11884		0.254967	12312	11912	11981		0.2544	11361	11640	11581
0.259283	12152	12459	12389		0.267683	11940	12126	12364		0.259033	11856	12311	11638		0.258433	11199	11776	11538
0.26335	12526	11993	12495		0.272183	11955	11841	11677		0.2631	12163	12151	12456		0.262483	11298	12096	11693
0.267383	12117	11991	12236		0.276383	11502	11883	12386		0.26715	11823	12211	11438		0.266533	11594	11626	11292
0.271433	12011	12165	12282		0.2807	11366	11546	12433		0.271217	12232	11764	11807		0.270583	11551	11769	11250
0.275517	11878	12062	11716		0.284883	12137	11980	11733		0.27525	11781	11725	11863		0.274633	11445	11834	12016
0.279567	12245	11747	12079		0.288933	11759	11498	11766		0.2793	11959	11645	11835		0.278683	11506	11104	11313
0.283617	12507	12252	11773		0.293117	11940	12585	12310		0.283367	11922	11861	11684		0.282733	11648	11413	11443
0.287667	11488	12454	11759		0.297167	12058	11744	12349		0.2874	11904	12244	11824		0.2868	11077	11182	11054
0.291733	12213	11732	12257		0.3012	11765	12219	12412		0.291433	11630	11744	12068		0.290867	11671	11687	11785
0.2958	12194	12196	11649		0.305267	11779	12070	11805		0.295483	12132	11541	11742		0.294917	11564	11645	10747
0.299867	12218	12073	11910		0.309317	11633	12347	12318		0.299517	11816	11858	11715		0.298983	11141	11445	11156
0.303933	11285	11910	12245		0.313367	11917	12339	12104		0.303567	11660	11706	12329		0.303033	11282	10831	11519
0.308	11677	11752	12676		0.3177	12152	12305	12146		0.307633	11348	12314	11363		0.307083	11439	11837	11463
0.312067	11779	11515	12438		0.321733	11242	12199	11382		0.311683	11859	12010	12017		0.31115	10722	11009	11703
0.316117	11958	12450	11570		0.325833	11528	11067	12117		0.31575	11756	12184	11396		0.315183	11534	11817	11693
0.320167	12272	12113	11392		0.329917	11471	12349	11988		0.3198	12256	11834	12299		0.31925	11548	11482	11530
0.324233	12040	11437	12524		0.33405	11373	12310	11711		0.323833	11498	11345	11713		0.3233	11264	11392	11920
0.328267	11842	11841	11878		0.338083	11772	11807	11884		0.327883	12085	12120	11423		0.32735	10829	11285	10878
0.332333	11931	11243	12076		0.342217	11643	11532	11621		0.33195	11653	11949	11785		0.3314	11372	11262	11700
0.3364	12059	11601	11652		0.3465	11452	11389	12370		0.336017	12058	10989	11544		0.335467	11501	11367	10761
0.340483	11399	11533	12019		0.35055	11406	12030	11617		0.340083	11833	11424	11483		0.339517	11073	11953	11345
0.34455	11336	11670	11344		0.35465	11495	12866	11574		0.34415	12072	11091	11547		0.343583	11002	11604	11335
0.348617	12006	11366	12139		0.358717	12018	11847	11982		0.348183	12012	11199	10958		0.347633	11298	11919	10942
0.352667	11953	11956	12120		0.36295	11808	11346	11764		0.352233	12562	11507	12201		0.351683	10757	11475	11469
0.356733	12039	11978	11821		0.367	11214	12187	11799		0.356267	12052	11362	11714		0.355733	11356	11245	11503
0.360767	11307	11695	12214		0.371117	10978	11871	12145		0.36035	11879	11358	11949		0.359783	10820	11302	11875
0.364817	11750	11539	11777		0.375167	11872	11948	12131		0.3644	11361	11265	11363		0.363833	10984	11638	11319
0.368867	11993	11552	11556		0.379333	11547	12215	12055		0.368467	12033	12256	11732		0.367883	11885	11403	11473
0.3729	12049	11634	12057		0.383583	11443	12313	12121		0.372533	12010	11286	11924		0.371917	10561	11506	11198
0.37695	12149	11937	12180		0.387617	10825	11473	12071		0.376583	11408	11584	11186		0.37595	10561	11352	11525
0.380983	11126	11545	11503		0.391983	11572	12038	12087		0.38065	12080	11896	11750		0.380017	11054	11262	11113
0.385067	12068	12156	11949		0.39615	11313	11795	12501		0.384683	11707	12042	11353		0.38405	10909	11296	11264
0.389117	11479	11709	12340		0.400633	11398	11928	11774		0.38875	11660	11197	11649		0.3881	11070	11013	11307
0.393167	11402	11777	11718		0.40475	11397	11595	11273		0.3928	11626	11870	11621		0.392167	10729	11110	10682
0.3972	11845	11997	11571		0.408917	11440	12049	11697		0.396867	12097	11498	11063		0.3962	10788	12017	11713
0.40125	11425	11175	11644		0.413367	11036	12109	10951		0.400933	11911	10959	11110		0.40025	10987	11136	11261
0.405367	11395	12145	11780		0.417467	11007	10885	12073		0.405	11425	11325	11736		0.40435	10778	10947	11455
0.409417	11466	11516	10868		0.421633	11729	11942	11678		0.409083	11726	11925	11221		0.4084	10491	10997	11279
0.4135	11771	11121	11971		0.426183	10963	11319	10949		0.413167	11879	11424	11230		0.412467	10812	10747	11576
0.417567	11769	11540	12069		0.43035	10926	11725	11624		0.417233	11234	11098	11252		0.416533	10872	11012	10635
0.421633	11174	11757	11842		0.434483	10944	10804	11848		0.42135	11335	10831	11248		0.4206	10834	11122	11001
0.4257	10937	11845	11051		0.438633	11967	11228	12306		0.425383	11259	10874	12075		0.424633	10400	11296	10578
0.429783	11494	11396	11791		0.4432	10918	11244	12231		0.429467	11074	11218	11209		0.428717	10946	11478	11723
0.433833	11326	11674	11035		0.447383	10587	11446	11559		0.433517	11838	11856	11492		0.43275	10983	10877	11426
0.437917	11562	11580	11469		0.451533	10883	11846	11736		0.437617	11478	11201	11614		0.43685	10809	11069	11042
0.44195	11139	11281	11353		0.455683	11352	11236	11790		0.441667	12084	12189	10873		0.440883	10249	11192	10614
0.446033	11308	11482	12060		0.4598	10906	11976	11536		0.44575	11263	11148	11675		0.444967	11130	10815	10746
0.4501	11074	10680	11171		0.463983	10991	11432	11017		0.449817	11682	11140	11508		0.449017	11002	10909	11178
0.454183	11835	11358	11681		0.468133	10974	11758	11876		0.453883	11365	11293	11125		0.453083	10642	10247	11221
0.458217	11499	11204	11448		0.472633	11407	11684	10904		0.45795	11238	11472	11210		0.45715	10883	10519	10505
0.4623	11254	11298	11563		0.476717	10535	10831	11315		0.462033	11163	11274	11132		0.461217	10581	10720	11110
0.46635	11219	11889	11173		0.480817	10728	12264	11581		0.4661	11418	10676	11201		0.465267	10713	10327	10713
0.470483	11739	11283	11338		0.484983	11109	10984	11647		0.47015	11190	10951	11189		0.46935	10637	10398	11431
0.474567	11492	11358	11511		0.4891	11145	11300	11082		0.474217	11186	11185	11349		0.473417	10393	11374	11047
0.478633	11457	11152	11950		0.49325	10842	11941	11563		0.4783	11049	11012	11128		0.4775	9755	11057	11427
0.482717	10693	11312	11442		0.497733	10844	11883	11677		0.482367	11095	10871	10833		0.48155	10430	10400	10946
0.486767	11520	11137	11199		0.502167	10592	11992	11147		0.486433	11664	10723	11316		0.485617	10338	10507	10866
0.49085	10981	11282	11799		0.506233	11429	12026	11230		0.490483	11393	11608	10650		0.489667	10103	10916	10344
0.494933	11864	10908	11231		0.510417	10667	10850	11270		0.494567	10833	11058	11313		0.49375	10310	10791	10673
0.499	11314	11404	11087		0.51485	10896	11851	11388		0.498633	11976	11282	11054		0.497817	10417	11098	10913
0.50305	11661	11472	11630		0.519033	11176	12175	10624		0.502717	10824	11340	11404		0.501883	10672	11162	10836
0.507117	11312	10851	11548		0.523517	10453	11596	11092		0.506767	11493	10689	10697		0.505917	10125	10945	10793
0.511167	11048	11680	10949		0.528017	10253	11416	11696		0.51085	11696	11155	11166		0.51	10607	10702	11180
0.515233	11497	11639	10808		0.5322	10454	10579	11004		0.514917	11198	10903	11071		0.514033	10586	10760	10484
0.5193	11761	11133	10912		0.536383	10069	11740	11079		0.519017	11207	10953	11184		0.5181	10524	10390	11754
0.523383	11564	10478	10749		0.5406	10983	11957	11231		0.523067	11267	11259	11524		0.52215	11245	10467	10955
0.527433	10897	10875	10655		0.545	10452	11668	10784		0.527133	11957	11203	10856		0.526217	9831	10384	10923
0.531533	11443	11480	10800		0.549133	11027	11565	11149		0.5312	11821	10931	11201		0.530267	10782	11061	11352
0.535583	11028	11281	11277		0.553517	10477	11358	11538		0.5353	10732	10855	10711		0.53435	10438	10838	10748
0.539667	11063	11115	11003		0.557583	10390	11918	11757		0.53935	11147	11598	11393		0.5384	10628	10905	10592
0.543717	10894	11394	11359		0.561767	10604	11786	11447		0.54345	10821	10912	11651		0.542467	10401	10625	11114
0.547783	11122	11707	11455		0.565833	10982	11659	11545		0.5475	11126	10894	10669		0.546517	10664	10322	11210
0.551833	11363	11303	11514		0.5699	10568	11046	11075		0.551567	11419	11198	11778		0.5506	10627	10617	10577
0.5559	11167	10309	10882		0.573967	10623	11915	11214		0.555633	11237	10622	11229		0.55465	10399	10372	10511
0.559967	11255	11262	11292		0.57805	11024	11351	11199		0.559733	11274	10609	10970		0.558717	10512	10946	10693
0.564067	11365	10891	11279		0.582133	10934	11955	11635		0.5638	10553	10518	10702		0.562783	9820	10485	10480
0.568133	11187	11297	10802		0.5862	11133	11028	10941		0.567867	11214	10693	10719		0.566833	10697	10422	10505
0.5722	11518	11501	10892		0.590267	11495	10648	11415		0.571933	10365	10794	10408		0.5709	10411	10847	10102
0.57625	11579	11169	10783		0.594317	10802	11045	11366		0.576017	11222	11050	10353		0.574967	10265	10126	10968
0.580317	11067	10964	10678		0.598383	10709	11516	10713		0.580083	10699	11044	10377		0.579017	10655	10335	11107
0.58435	11133	10868	10762		0.602433	10659	11741	11424		0.584167	11461	10440	11064		0.583083	10145	10988	10586
0.588433	11200	11020	11501		0.6065	10930	11189	10926		0.588233	10895	10949	10842		0.587133	10087	10273	10576
0.5925	11691	10775	10688		0.610533	11056	11727	11215		0.5923	11101	11883	10877		0.5912	9805	11286	10547
0.596583	11209	10642	10857		0.614617	11172	11173	10857		0.596367	11238	10658	11103		0.595233	10046	10047	10633
0.60065	11274	10865	10764		0.618683	10319	11242	10872		0.600433	10954	10780	10946		0.5993	9939	11238	10739
0.604717	11403	10890	10973		0.62275	10342	11320	11095		0.6045	10658	10516	11098		0.60335	10096	10254	10329
0.608767	11464	10960	10878		0.6268	10471	11135	10555		0.608583	10899	11048	11154		0.607433	10489	9833	9677
0.61285	11148	10395	11120		0.630883	10446	10726	11010		0.61265	11466	10041	10878		0.611483	10394	10118	10798
0.616917	10830	10882	10895		0.634917	10782	11244	10992		0.616717	10868	10697	10597		0.61555	9741	10876	10619
0.620983	11161	10526	11310		0.639	10686	10967	10145		0.620767	11136	10829	10207		0.6196	10466	10362	10194
0.625033	11445	10393	10986		0.64305	10752	11167	10812		0.62485	10909	10203	10522		0.623683	10679	10454	10386
0.629117	10376	10418	10573		0.647133	10857	11134	10648		0.628917	10920	10805	10532		0.627717	9993	10749	10343
0.63315	10982	10693	10327		0.651183	10774	11100	10550		0.633	11023	11228	10052		0.631783	10370	10360	10438
0.637233	11246	10651	10895		0.65525	10513	10634	10673		0.637067	11130	10262	10316		0.635833	10429	10096	10279
0.6413	10709	10504	10909		0.6593	10375	10681	10914		0.641133	11187	10603	10255		0.6399	10324	10532	10633
0.645367	11013	11539	10587		0.66335	10764	10578	11065		0.645183	10532	11321	10267		0.64395	10233	10473	10499
0.649433	11219	11099	10837		0.667417	10671	11313	10478		0.649283	11004	10818	10266		0.648017	9841	10627	10739
0.653517	10776	10796	11171		0.671483	10420	11254	10814		0.653333	10502	10687	10391		0.652067	9713	10164	10626
0.657567	11129	10526	10862		0.675533	10513	11051	10931		0.657417	10803	11347	10689		0.65615	10094	10425	10072
0.66165	10966	10629	11261		0.6796	10289	11020	10947		0.661483	10490	10162	10429		0.6602	10269	10439	10272
0.665717	11064	10450	10854		0.683633	10610	11162	10905		0.665567	11009	10455	10605		0.664267	10320	10451	10173
0.669783	10528	10366	11133		0.6877	10553	10869	11154		0.669633	10723	10400	10200		0.668317	9785	10308	10159
0.67385	10792	10581	10571		0.69175	10423	11160	10597		0.673717	11271	10912	10297		0.672383	9833	10397	10081
0.677933	10082	10938	11086		0.695817	10656	11657	10536		0.677767	11067	10857	10610		0.676433	10028	10109	10314
0.681983	10562	10405	10701		0.699883	10305	11233	11386		0.68185	11110	10236	10087		0.6805	10346	10300	10537
0.68605	10616	10473	10897		0.70395	10819	10528	10775		0.6859	10363	10263	10433		0.68455	10079	10582	9628
0.6901	10534	10016	10113		0.708017	10377	11092	10942		0.689983	10576	10762	10119		0.688633	9634	10009	10191
0.694183	10338	10261	11128		0.7121	10285	11018	11240		0.69405	10995	10763	10819		0.692667	10035	10161	10800
0.69825	10910	9978	10369		0.716133	9665	10707	10267		0.698133	10485	10534	10545		0.696733	10091	10224	10442
0.702317	10893	10432	10324		0.7202	10400	11093	10713		0.702167	10770	10369	9976		0.700783	9457	10098	10356
0.706383	10632	10304	10583		0.72425	10749	10785	11030		0.706267	10519	10546	10192		0.70485	10142	9849	10705
0.710433	10677	10472	10665		0.728317	10881	10982	10849		0.710317	9642	9687	10014		0.7089	10714	10067	10525
0.7145	10164	10829	10472		0.732383	10633	10879	10510		0.7144	10667	10118	10024		0.712983	9727	10341	9834
0.718567	10746	10150	10326		0.736467	10059	10770	10465		0.718467	10964	10433	10263		0.717033	9991	10028	9987
0.722633	10537	10614	10308		0.7405	10433	10473	10773		0.72255	10938	10261	9649		0.721083	9937	9628	9711
0.7267	10048	10398	10492		0.7446	10187	10943	10060		0.726617	10469	10704	10093		0.725117	9794	9522	10294
0.730767	10890	10064	10986		0.748633	10235	11094	10529		0.7307	10624	10230	9687		0.729183	9618	9734	10185
0.73485	10781	10296	10362		0.7527	10049	10819	9930		0.734733	9685	9671	10263		0.733217	9182	9560	10087
0.7389	10723	10702	10553		0.756767	10683	10743	10295		0.7388	10453	10131	10149		0.737283	9563	9910	10149
0.742967	10077	10277	10610		0.76085	10171	11029	10383		0.742867	10392	10663	10082		0.741333	9665	9958	10038
0.747033	10334	10983	10641		0.764883	10100	10377	10737		0.74695	10729	10758	10222		0.745417	9807	9835	10275
0.751117	10202	10409	10345		0.76895	10341	10905	10316		0.751	10297	9802	9147		0.74945	9494	9855	10178
0.755183	9907	10058	10309		0.77305	10049	10755	10407		0.7551	9693	10451	9875		0.7535	10451	9648	10049
0.759267	10360	10322	10280		0.777117	9947	10367	9988		0.75915	10111	10194	9853		0.757567	9717	9917	9810
0.763317	10617	10441	10190		0.781167	10371	10786	10016		0.763233	10748	10135	9732		0.761633	9545	9719	10373
0.7674	10446	10336	10310		0.785233	10215	11149	10241		0.7673	10656	9783	10088		0.765683	9815	10317	10271
0.771467	10137	10440	11010		0.789283	9560	10241	10924		0.7714	10349	10256	9854		0.76975	9297	10120	10061
0.775533	10376	10529	10361		0.793367	10115	10674	10450		0.77545	10004	9980	10293		0.7738	10046	10312	9471
0.779583	10136	10178	10836		0.797417	10220	10106	10195		0.779533	10210	10603	10060		0.777883	9926	9573	9894
0.783667	9836	10157	9606		0.801517	10388	10366	10268		0.783583	10713	9738	10602		0.781917	9777	9748	9686
0.7877	10155	9874	10305		0.805567	10108	10853	10075		0.787667	10636	9889	10059		0.785983	9233	9711	9598
0.791783	10226	10265	10067		0.80965	10028	10703	10909		0.791733	10819	9921	9976		0.790017	9123	9748	9801
0.79585	9671	10227	10670		0.813683	9848	9664	10524		0.795817	10243	10396	9370		0.794083	9620	9964	9334
0.799933	10692	10556	10272		0.817733	9734	10979	10105		0.79985	10567	9842	10041		0.79815	9675	10146	9860
0.803967	10581	10660	10236		0.821783	9629	10487	10317		0.803933	10301	10354	9486		0.802217	9590	9431	9558
0.808033	10496	9985	10150		0.82585	10917	10580	10043		0.807983	10550	10923	10509		0.806267	9164	9553	9614
0.8121	10275	10765	10285		0.829883	9779	10227	9953		0.812067	10517	10331	10048		0.81035	9888	9520	9859
0.816183	10639	10153	10214		0.833967	10332	10498	10053		0.816117	10373	9647	10151		0.814383	9241	9839	9489
0.820233	10559	10133	10490		0.838017	10071	9693	10250		0.8202	10507	9789	10057		0.81845	9057	9898	10129
0.824317	10002	10544	10228		0.842083	9467	9937	10281		0.824267	10459	9303	10050		0.822517	9154	9778	9315
0.828367	9971	9915	10400		0.846117	9729	10452	10141		0.82835	9935	10207	9757		0.8266	9671	9360	9809
0.83245	10378	10166	10449		0.850183	10137	10349	9985		0.8324	10293	9855	9597		0.830633	9205	9896	9680
0.836517	10203	10014	10039		0.854233	9587	10287	10409		0.836483	10183	9869	9656		0.8347	9006	9413	9750
0.840583	10285	9674	9614		0.8583	10222	10187	10571		0.840533	9790	9833	9681		0.83875	9457	9678	9701
0.844633	9551	9680	10154		0.86235	10218	10279	10281		0.844617	10679	9905	9679		0.842833	9496	9850	9532
0.8487	10342	9698	10068		0.866417	9714	10323	9719		0.8487	9817	10194	9220		0.846883	9765	9521	9110
0.852767	10003	9549	10474		0.870433	10093	10185	9909		0.852767	9793	10178	9635		0.850967	9486	9286	9392
0.85685	10481	9806	9965		0.874533	10046	10024	10012		0.856817	10002	10224	9562		0.855	9557	10043	9752
0.860917	9293	10064	10356		0.87855	9463	10424	10063		0.860883	10018	9586	9538		0.859067	9372	9590	10163
0.864983	9448	10181	10188		0.882617	9829	10289	10731		0.864933	10596	10044	9197		0.863117	9656	9860	9821
0.869017	9498	9682	10278		0.886683	9991	10078	10191		0.869017	9567	10666	8805		0.867183	9410	9793	9876
0.8731	10253	10167	10427		0.89075	9572	10098	10311		0.873067	10679	9900	9692		0.871233	8866	9616	9623
0.87715	10430	10133	9841		0.8948	10099	10405	10302		0.87715	9514	9874	9050		0.8753	8937	9391	9755
0.881217	9248	10153	9841		0.898883	9970	9882	9746		0.881183	10623	10262	9886		0.879333	9325	9532	9598
0.885267	10108	9794	10116		0.902933	9822	9905	10010		0.88525	10105	9779	9790		0.883433	9226	9291	9876
0.88935	10126	9631	10122		0.907	9577	10782	10463		0.889317	10283	9178	9157		0.887483	9356	9004	9710
0.8934	9409	10256	10091		0.911033	9824	10319	9801		0.8934	10193	9546	9650		0.89155	9020	9751	9874
0.8975	9748	9681	9893		0.915117	9623	10121	9767		0.89745	9910	9563	9751		0.895583	9484	9618	9214
0.90155	10452	10204	10186		0.919167	9702	10356	10251		0.901533	9702	10084	9235		0.89965	8835	9549	9146
0.905633	9728	9944	10068		0.92325	9313	10348	9965		0.905567	9327	9768	9206		0.903683	9559	10043	9564
0.9097	10009	9640	9612		0.927267	9776	10061	9940		0.90965	9824	9960	9740		0.90775	9255	9445	9319
0.913767	9839	9983	10159		0.931383	9244	9945	9564		0.9137	10307	9308	9867		0.9118	9504	9357	8920
0.917817	10132	9905	10007		0.935433	9299	9761	10351		0.917767	10005	9607	10238		0.915867	9760	9627	9402
0.921917	10126	9412	9569		0.9395	9603	9620	9825		0.921817	9788	10044	11082		0.9199	10743	9273	9176
0.92595	9769	9760	10034		0.943533	9450	9881	9706		0.9259	9817	9841	13123		0.923983	13317	9486	9433
0.93005	9907	9710	10173		0.9476	9545	9858	9656		0.92995	9622	9977	17256		0.938567	30350	9414	8770
0.9341	10107	10985	9542		0.951633	9723	10397	9510		0.934017	9280	10418	26903		0.953417	77527	11174	9756
0.938183	10039	14753	10051		0.955717	10466	9939	9913		0.938067	10086	10427	42368		0.968433	134265	13117	9848
0.94225	10837	73497	9526		0.95975	10899	9949	9588		0.942167	9728	11578	57312		0.983583	105295	17464	9723
0.946333	12309	250774	10087		0.963833	12524	9736	10312		0.9462	9600	21487	62728		0.99875	75129	41273	9230
0.9504	17802	228124	11543		0.9679	20558	10068	11360		0.950283	10228	51842	80032		1.0138	40236	90340	10372
0.965133	90763	365207	25102		0.982633	76281	9622	15550		0.954317	9550	101593	409003		1.02865	72713	135104	11082
0.980167	295108	197000	93558		0.997617	193683	10030	41259		0.9584	9787	165364	396111		1.0436	683186	104913	11282
0.995483	219976	265731	213642		1.01282	157489	10320	87717		0.962433	10625	152759	826807		1.05905	263358	72614	12602
1.01055	404604	251394	152199		1.02787	260951	9569	148293		0.966517	11321	110911	396971		1.07408	436991	45310	16670
1.02568	219822	185205	245122		1.04302	218403	9936	165558		0.970567	13639	85872	682256		1.0893	437612	193460	28870
1.0407	271076	286295	221800		1.05813	168241	10023	197664		0.97465	16531	166302	746071		1.1046	235504	959273	34337
1.0558	230377	765948	224876		1.07313	107824	10698	167211		0.989267	39606	672941	463571		1.11962	108797	333217	30402
1.07073	147405	288250	191269		1.08813	140919	11553	147038		1.00422	96117	278397	1280008		1.13455	1377782	549026	45684
1.0857	201212	571003	366715		1.10328	451175	15892	429053		1.01935	214391	504054	1304537		1.15042	1440706	539991	552212
1.101	559084	706122	934308		1.11895	336581	55099	941531		1.03453	137925	657972	2048664		1.16575	1495243	388398	338044
1.11682	372085	589723	349722		1.13435	600633	139500	320743		1.04965	156399	640898	863547		1.18102	552418	198011	804040
1.13227	600011	484018	684743		1.15003	680957	253913	560621		1.06477	99845	428714	1140344		1.19595	686296	2383864	753053
1.14787	626211	704062	792641		1.16575	661217	155351	789040		1.07985	106299	600581	1381912		1.21103	988584	1977142	746446
1.16335	503665	870764	678444		1.18128	703528	233251	651432		1.09515	240849	1605177	667751		1.22628	1025577	1135778	806440
1.1789	572606	621711	510755		1.19698	592758	208256	606821		1.1108	565458	919077	305537		1.24157	916819	1276481	387735
1.19462	1194276	1100809	928785		1.21217	1443490	164825	1062708		1.12635	335409	1293959	378539		1.25688	1185405	1500355	1679735
1.21057	1306217	1507794	738009		1.22755	510985	145383	949411		1.1414	524310	1770291	513797		1.27213	447030	1433578	2657145
1.22572	550631	2270962	1114779		1.2423	849363	368819	775188		1.1569	553653	739586	349041		1.28677	378231	1116613	1087763
1.24057	1571184	829065	509736		1.2572	945183	727109	923129		1.16173	518431	837549	340959		1.30168	209479	599487	1269821
1.25565	2106506	1214927	914765		1.27225	1080207	323327	997244		1.1771	429678	334559	160996		1.31638	164231	1007385	1456903
1.27082	2247365	3554993	1191200		1.28735	1129151	573990	782250		1.19262	669507	330152	265994		1.33118	138216	348237	1401876
1.28593	1435672	3027633	945100		1.30247	2057804	722934	833736		1.20858	1129013	471673	265302		1.34582	123727	436448	1196228
1.30103	3267169	3054648	1915318		1.31747	2045772	638432	1504745		1.22392	1044962	515178	258254		1.36058	99274	254824	569239
1.31582	2965974	1850449	2889682		1.33222	2467225	631572	1867756		1.23903	1612840	341384	230154		1.37527	73181	140926	394311
1.33058	3344762	1291135	3133162		1.34708	1805190	1171108	1752098		1.25413	1464104	299882	159496		1.39013	65039	130531	416625
1.34535	2237446	1199805	2516842		1.36183	1043232	1168584	1183891		1.26923	1319849	134429	168450		1.40502	59156	122530	305991
1.35993	1932720	1112954	1631927		1.37653	801715	568420	728076		1.2843	681696	268624	107375		1.4199	45560	91850	238810
1.37467	1239638	1058484	969905		1.39132	725842	895565	518514		1.2994	363372	271425	72542		1.43477	41561	85992	167215
1.38938	1344391	722057	905946		1.40602	710109	802784	420299		1.31455	639272	269081	68396		1.43893	38854	76327	142697
1.40412	1020678	727560	814422		1.42072	583294	861234	428381		1.32988	885714	234144	57800		1.44312	35641	58983	124915
1.4187	944304	541364	832264		1.43533	393485	872163	341363		1.34548	629317	179714	56735		1.45783	31537	46616	94934
1.42275	1013764	479021	482897		1.45005	335323	3110719	224147		1.36115	465005	139597	61023		1.47255	27790	47583	78041
1.43742	647865	390188	478893		1.46482	261935	2128886	210360		1.37673	173553	120123	58951		1.47673	28382	38324	71139
1.45203	574933	336191	380590		1.47957	235089	1871211	174554		1.39137	303696	90561	63903		1.48088	26393	35434	67565
1.46665	498281	342034	339294		1.49437	191711	1214599	175645		1.40598	311219	102962	65592		1.49555	24543	35361	54483
1.48137	452691	385606	302642		1.50907	192304	868461	144064		1.42058	336485	77838	67431		1.49972	24459	33034	51139
1.49595	434367	275892	256163		1.51315	204628	616725	121629		1.42463	289438	76122	74395		1.50387	23186	34363	47514
1.51055	384740	276067	250137		1.51722	181131	720565	122174		1.42865	339927	62905	71364		1.50802	23384	28272	44909
1.51458	360321	334244	217132		1.53197	165865	579050	126243		1.43268	308461	75874	74099		1.51217	24043	27824	42418
1.51862	370208	325012	228840		1.5466	139950	418248	112582		1.44722	270626	69182	73688		1.51632	24387	26704	37724
1.53322	327535	335842	183600		1.55068	140419	345990	112888		1.46182	206572	67194	73206		1.52048	24806	26439	37521
1.53728	332395	378482	215683		1.56532	125767	284062	107279		1.46585	201712	73651	76906		1.52463	24935	24576	36968
1.55187	359012	365640	230590		1.5694	133238	249657	110124		1.48043	132528	77341	75365		1.52877	25730	24910	35830
1.5665	357140	375338	285385		1.57347	115445	227295	103548		1.49503	98777	77856	73831		1.53292	25234	24064	31958
1.57055	445775	393375	188979		1.57757	142775	190327	91041		1.49907	104196	79804	74289		1.53705	25730	22526	30766
1.57458	384181	494763	331445		1.58165	151589	176646	93530		1.50312	118318	81439	72451		1.5412	27793	22376	29760
1.57865	432206	446944	120301		1.58575	134128	168288	102282		1.50718	107167	89763	77949		1.54538	26649	21986	28666
1.58268	411109	473650	223187		1.58978	156567	148398	100942		1.52177	77831	84795	90566		1.56007	32553	22372	26360
1.58673	448620	589577	271670		1.59387	153799	141847	86968		1.52585	83905	92095	87733		1.56422	38230	20822	27720
1.59075	418868	691860	275610		1.59792	202958	134227	102510		1.5299	81351	84945	114895		1.56837	44972	21065	26359
1.5948	439309	664133	255053		1.602	93599	147951	102943		1.534	85989	88216	140700		1.57253	69035	21550	25039
1.59882	431467	1020735	312011		1.60602	175843	132536	92863		1.53805	83205	90345	186090		1.57667	94344	21010	24317
1.60288	530774	648392	325395		1.61007	209008	154107	111129		1.54213	80433	86359	244465		1.58082	82331	21745	24369
1.60692	497378	1112871	355776		1.61413	206671	133793	88459		1.54618	84435	91849	370613		1.59557	257076	20150	22385
1.61097	586349	1333099	375645		1.61822	214422	161115	111827		1.55025	73791	105054	240396		1.61022	72032	20309	22977
1.61502	776616	1181614	416562		1.62227	219159	152976	106464		1.5543	81855	113901	86310		1.62482	26261	21143	22001
1.61905	645857	1124585	480275		1.63688	305956	175950	102458		1.55838	81516	143331	40315		1.62887	27507	19603	21924
1.62307	916176	964758	604377		1.6515	534109	189756	104407		1.56245	82212	193633	35125		1.6329	31186	19935	21893
1.62712	930194	1039248	618884		1.66613	670256	184405	113807		1.56653	87688	271882	44488		1.63703	30796	20354	21036
1.63115	1081774	619908	1358196		1.6808	1195850	184431	100421		1.57057	89096	330720	60033		1.6412	25245	22264	19992
1.6352	1155908	662795	643021		1.68485	479621	178286	108868		1.57465	85580	155406	63308		1.6559	18072	23491	20484
1.63925	1227850	479508	797973		1.68887	720959	213455	114698		1.5787	89714	58890	52675		1.66003	16642	27881	19375
1.64328	1282905	382083	793176		1.69292	806538	236776	134216		1.5828	92768	26623	47954		1.66417	16432	114959	19301
1.65782	1000477	317121	696197		1.69693	636338	209372	134772		1.58683	91747	38039	44362		1.66827	16597	104539	19237
1.66187	1101465	90375	548740		1.70097	550027	239470	152875		1.59092	92999	27196	40403		1.67237	16203	74040	17807
1.66592	779560	108463	464728		1.70498	410175	307352	440631		1.59498	91142	24122	32792		1.67648	15325	69378	19014
1.66997	786360	79706	368974		1.70903	361434	329541	242255		1.59907	86055	25178	26037		1.68057	15535	62726	18113
1.674	575838	77758	312290		1.71307	302103	791151	698405		1.60312	93683	24371	21654		1.6847	14583	55382	17928
1.67803	585357	73507	90871		1.7171	203592	399094	291564		1.60722	85134	30381	21245		1.68882	14701	26228	17606
1.69262	128450	55085	50825		1.72113	165493	690011	433011		1.61127	87091	37530	21458		1.69288	14275	22747	17563
1.69668	159695	40875	45307		1.72522	142429	657844	550005		1.61537	87605	47227	19087		1.697	14114	20719	17690
1.71127	78374	32982	51937		1.72928	100690	680054	453997		1.61943	89443	47854	19797		1.70108	13700	19103	17681
1.72602	61671	29315	45784		1.74395	55345	587457	398165		1.6235	96138	42573	21050		1.70518	13175	17936	17577
1.74067	59927	27981	34007		1.75865	64478	220958	137916		1.62755	94803	36105	20927		1.70927	13717	17905	17695
1.75558	47460	28992	29020		1.77337	69145	88980	146878		1.63165	108642	31389	21414		1.71337	13225	17580	18669
1.7598	42721	25992	23629		1.78822	63302	48227	53003		1.63568	120158	29687	22084		1.71745	13566	16854	24137
1.77453	35774	24968	21763		1.80307	53091	63401	39890		1.63978	153325	30706	24287		1.72152	13375	16182	34279
1.7894	29488	23896	19016		1.81798	42728	58282	45767		1.64385	183813	29259	25205		1.7256	12483	15612	49614
1.79357	27497	24000	18232		1.8328	34540	51798	39321		1.64797	242122	27412	26144		1.7297	12672	16493	115613
1.7977	27759	22443	17713		1.84752	26468	39181	30748		1.66263	510727	23804	26431		1.73382	12224	16490	112912
1.80188	26619	22479	15997		1.85167	25195	32316	27308		1.6776	191916	17376	29580		1.7379	13040	15051	58070
1.80603	26954	22802	16422		1.8558	23883	28534	27612		1.6922	118373	16073	28431		1.74198	12831	15307	32286
1.82083	24192	19297	15846		1.85997	22875	25303	28841		1.69628	122437	15392	28718		1.74607	12873	14947	23485
1.83553	22767	18621	15904		1.86412	22321	22185	28336		1.71107	71397	14644	27798		1.75012	12740	14999	20561
1.83965	21455	18606	15216		1.86827	20941	22983	23787		1.7259	105028	15199	29068		1.75422	12338	14245	19764
1.84375	21656	17564	15928		1.8724	20902	23293	19574		1.7409	76660	13603	30708		1.7583	12776	14129	19062
1.8479	22139	17337	15555		1.87653	19664	25059	17435		1.75575	70081	13602	28531		1.76238	12122	13120	18925
1.85203	19636	17661	15391		1.88068	19609	22663	16083		1.77065	62054	13189	28404		1.76645	12399	13513	18695
1.85618	19755	17736	15800		1.8848	20020	20334	15960		1.78553	55424	13260	28278		1.77053	12479	14493	17968
1.8603	18432	17283	16077		1.88892	19787	18936	14333		1.80025	48485	12890	28959		1.7746	12372	13398	17949
1.86442	19310	16880	15440		1.89307	20066	18304	14119		1.81493	50199	12793	28789		1.7787	11408	11998	17168
1.86857	19596	17189	15777		1.89718	19902	17900	13883		1.82975	57776	12796	27390		1.78277	12096	13159	17236
1.8727	19026	16726	15582		1.90128	20170	17797	13804		1.84457	69200	12665	27054		1.78687	11743	12576	17365
1.87682	17447	16892	15081		1.90542	20486	17465	13691		1.8594	68962	12377	23199		1.79095	11384	12662	17130
1.88092	18383	17825	14810		1.90953	19875	16824	13188		1.87418	58591	12624	25163		1.79503	11763	12757	16430
1.88505	17722	16094	14705		1.91363	19351	16932	13952		1.88898	56551	13190	22598		1.79912	11114	12825	15920
1.88918	17304	16895	15129		1.91777	20404	16473	13922		1.90377	46177	13048	23864		1.8032	11185	13153	15786
1.8933	16866	15003	15661		1.92188	20039	16646	13489		1.91843	38084	13465	21167		1.80727	11085	11970	16645
1.89738	16691	17189	15009		1.92598	19398	15403	13163		1.92255	36446	12578	22440		1.81137	11582	12562	15608
1.9015	16480	15910	14808		1.9301	19677	15375	12131		1.92667	33639	13783	19396		1.81542	10929	12330	14822
1.90557	16225	16123	14648		1.9342	19269	15328	13215		1.93078	28977	13112	19604		1.81952	10780	12338	15394
1.90967	17046	15965	15135		1.93833	19598	14316	12806		1.93487	30422	13556	19518		1.82357	11363	12161	15020
1.91373	15504	15676	14058		1.94243	19333	15165	12923		1.939	26953	13811	17291		1.82765	11058	11181	15425
1.91785	16061	15181	14440		1.94653	19116	14701	12720		1.94312	24841	14240	17773		1.83172	10843	11584	14095
1.92193	15076	15542	13760		1.95067	19099	14130	12304		1.9472	23933	14440	16443		1.8358	10350	11475	14835
1.92603	15567	15247	14324		1.95478	19246	13879	12466		1.95132	22583	14965	15988		1.83983	10652	11809	13695
1.93012	15371	14703	13481		1.9589	18316	13342	12960		1.95542	20113	15523	16211		1.84392	11073	12330	14417
1.93422	14294	13988	13515		1.96302	18567	13190	11515		1.95953	19720	15334	15544		1.84798	11434	11792	13834
1.9383	13820	13204	13242		1.9671	18815	13068	11502		1.96362	18938	15694	15272		1.85208	10409	11385	13736
1.9424	14670	13983	13481		1.97122	18268	13036	11932		1.96773	18587	15897	14110		1.85613	10117	11820	14519
1.94647	14861	13873	12645		1.97532	18147	13681	12346		1.97183	17012	15645	13947		1.8602	10395	11220	13153
1.95057	14138	14526	13481		1.98997	16851	13800	12754		1.97593	15908	16513	13342		1.86425	10188	11260	13591
1.95465	13872	14037	13138		1.99408	16754	13167	12189		1.98002	16003	15760	13341		1.86833	9672	10692	13608
1.95875	14761	13414	11872		1.99817	16430	13219	11666		1.98412	16009	16509	13652		1.87238	9750	11444	14047
1.96282	14106	13645	11981		2.00228	16168	13200	10922		1.9882	15246	16358	13158		1.87645	10227	10663	13433
1.96692	14086	13720	12210		2.00635	15894	12764	11374		1.9923	14147	16794	12448		1.88052	10122	11541	12328
1.971	13100	13671	11952		2.01048	16576	12111	11433		1.99637	14260	16286	12316		1.88458	10865	10583	13189
1.9751	14007	12681	12410		2.0146	15967	11774	10659		2.00045	14112	16645	11413		1.88865	10573	10557	12049
1.97917	13626	12716	11576		2.01868	15898	12054	11454		2.00455	13657	16909	11794		1.89272	10456	10481	12730
1.98327	12969	13316	11361		2.0228	14897	12401	11871		2.00867	13522	16857	11907		1.89677	9788	11018	12695
1.98733	13235	12990	11880		2.0269	15908	12368	11939		2.01272	12854	17059	11549		1.90083	10112	10845	13208
1.99142	12483	11211	11461		2.03102	14307	11955	10986		2.01682	13169	16223	11699		1.90488	10317	10743	11833
1.99547	12769	12505	11178		2.0351	14327	11636	11456		2.02087	11824	16041	10436		1.90897	10251	10406	12036
1.99957	12771	11808	11153		2.0392	14216	11837	11208		2.02497	12594	15834	10918		1.913	10156	11361	13316
2.00363	12786	11900	11099		2.04327	14315	11216	11099		2.02902	12195	16473	11370		1.91707	9671	10636	12156
2.00773	12847	11374	11309		2.04735	13919	12078	11305		2.03312	12058	16421	10811		1.92112	10507	10810	11589
2.0118	12412	11705	10857		2.05143	13398	11113	10693		2.03717	11503	15669	10801		1.92522	10102	11406	11942
2.01592	12067	11727	10805		2.05552	13523	11545	10865		2.04125	11741	15648	10520		1.92927	9731	10366	12240
2.01998	12089	11087	10705		2.05957	13122	11757	10294		2.04532	11116	15062	10814		1.93335	9899	10424	11777
2.02407	12088	11572	11083		2.06368	12776	11507	10503		2.0494	11799	15453	10646		1.93738	10251	10676	11760
2.02815	11645	10901	10990		2.06775	12838	10918	10413		2.05345	10968	15219	10613		1.94145	9342	10810	11761
2.03225	11806	10916	10886		2.07185	12991	11290	9840		2.05755	11118	13894	10236		1.9455	10176	10274	12021
2.03632	11894	11248	10618		2.07592	12874	10622	10287		2.06163	11685	14557	10032		1.94957	9838	10732	11501
2.0404	11484	11751	10832		2.08	12325	11588	10268		2.06573	11334	14156	9897		1.95362	10411	10677	11874
2.04445	11216	11230	9940		2.08408	12422	11250	10391		2.0698	10868	13967	10059		1.9577	9762	10594	11712
2.04855	11333	10681	9561		2.08818	12021	10606	10766		2.07387	11191	13811	9604		1.96173	9468	10491	11789
2.05263	11643	11248	9728		2.09227	12334	10466	10209		2.07792	10582	13672	9995		1.96583	10049	10865	11875
2.05673	11543	10480	9667		2.09635	12161	10587	10026		2.082	11031	14058	10074		1.96988	9690	10867	11898
2.06078	11077	10932	10207		2.10042	12082	10802	9796		2.08607	10636	13801	9826		1.97395	9800	10711	12197
2.06488	11772	9813	9240		2.10452	11731	10861	9794		2.09015	10942	13565	9786		1.97798	9673	10904	11537
2.06895	11872	10354	9789		2.1086	11376	10966	9996		2.09422	10608	13684	9726		1.98205	9305	10733	11806
2.07303	11074	10333	9803		2.1127	11106	10511	9910		2.09828	10750	13173	9226		1.9861	9064	9980	11598
2.0771	10924	10244	9859		2.11675	11488	10908	9550		2.10233	10132	12314	9719		1.99015	9063	10421	11777
2.08118	10825	10161	9486		2.12085	10772	10814	9962		2.10642	10488	12685	9835		1.9942	9573	10774	11403
2.08523	10461	9926	9177		2.1249	11257	10138	9662		2.11045	9629	12662	9463		1.99828	9649	10193	11580
2.08932	10632	9880	9338		2.12897	10956	10102	9713		2.11452	10035	12220	9673		2.00233	9552	9906	11349
2.09337	11230	10028	9830		2.13307	11570	10512	9453		2.11857	9728	11916	9680		2.00642	9595	10432	11336
2.09747	10505	10104	9372		2.13715	11264	10422	10058		2.12263	10263	12199	8721		2.01048	8961	10482	11288
2.10152	11000	9717	9986		2.14123	10750	9863	9754		2.12668	9651	11185	9196		2.01455	8884	9970	10402
2.1056	10798	10200	9303		2.14533	11224	10220	9702		2.13077	9558	11733	9226		2.0186	9562	9722	11481
2.10963	10327	8779	9088		2.1494	10738	9933	8989		2.13482	9769	11039	9452		2.02267	9588	10495	11341
2.1137	10239	9928	8808		2.15347	10265	9704	10050		2.1389	9555	11178	10328		2.02672	9469	9894	11044
2.11775	10121	10250	9249		2.15752	10270	10364	9450		2.14295	9697	10521	9367		2.03078	8793	9820	10601
2.12183	10420	9597	9434		2.1616	10610	10041	9488		2.14703	9828	10505	9473		2.03482	9165	10521	11180
2.12588	10722	9352	9360		2.16565	10667	10656	9763		2.15108	10358	10731	8963		2.03888	10191	10102	10957
2.12998	10481	9427	8672		2.16973	10067	9879	9875		2.15515	9295	10388	9076		2.04292	9116	10145	10517
2.13402	9948	9898	8737		2.17378	10525	9910	9544		2.1592	9821	10199	8343		2.04702	8969	10091	10780
2.1381	10739	9675	9107		2.17785	10016	9527	9190		2.16328	9028	9748	8814		2.05105	9227	10042	10768
2.14215	9937	9931	8922		2.18192	10524	9943	9238		2.16732	9208	10524	8413		2.05512	8753	10111	11390
2.14623	9802	9542	9070		2.186	9977	9778	9116		2.1714	9222	10091	9131		2.05915	9229	9873	11051
2.15028	10104	9363	9104		2.19005	10434	9502	9023		2.17545	9057	10035	8850		2.06325	8622	9840	10770
2.15435	9748	9071	9011		2.19413	9578	9551	9650		2.17953	9539	10628	9089		2.06728	9119	9455	11115
2.1584	10118	9187	8883		2.1982	9329	9651	9396		2.18358	9136	10025	8670		2.07135	8497	9442	10677
2.1625	10007	9212	9094		2.20228	9372	9767	8981		2.18767	9031	9554	8450		2.07542	8541	9143	10930
2.16653	9637	8922	8576		2.20635	9679	9595	9209		2.1917	8856	9730	8573		2.07948	9328	9487	10878
2.1706	9806	9075	9146		2.21042	10502	9538	8937		2.19578	8517	9687	9335		2.08353	8403	9690	10359
2.17467	9658	9184	8444		2.21448	9932	9843	9222		2.19983	8863	9375	8511		2.08762	8387	9708	10249
2.17875	9793	8520	8833		2.21855	9423	9069	8597		2.20392	9064	9505	7994		2.09165	9252	9337	10158
2.18278	9867	9009	8467		2.2226	9547	9446	8680		2.20798	8740	8914	8732		2.09575	8248	9265	10743
2.18687	9518	8933	9312		2.22667	9416	9111	9450		2.21205	8460	9570	8553		2.0998	8937	9191	10115
2.19093	9758	8946	8191		2.23072	9619	8879	9431		2.2161	8722	9324	8570		2.10387	9095	9093	9998
2.195	9662	8925	9236		2.23478	9453	9598	8255		2.22017	8564	9248	8339		2.10792	8523	9476	10376
2.19907	9579	9097	8645		2.23883	9885	9878	9010		2.22422	8928	8908	8739		2.11197	9277	8605	9897
2.20315	9385	8909	8910		2.2429	9504	9154	8912		2.2283	8621	9358	8292		2.11603	8620	9950	9610
2.20718	9023	8608	8521		2.24697	9933	9199	8660		2.23237	9094	8916	7760		2.12008	8597	9643	10205
2.21127	9418	8393	7863		2.25103	9447	8975	9113		2.23645	9209	9843	8478		2.12413	8573	9003	10273
2.21532	8844	8599	8320		2.2551	9145	9315	8611		2.24047	8601	9439	8549		2.12823	9069	9420	10053
2.2194	8470	8754	8433		2.25918	9549	9366	8538		2.24457	8315	8708	8632		2.13227	9017	8745	9934
2.22345	8477	9034	8491		2.26322	9043	9246	8699		2.24862	8874	8746	8557		2.13635	8550	8888	10209
2.22755	9234	8654	8471		2.2673	9068	8540	9016		2.25267	8625	8663	8315		2.14038	8479	8806	10453
2.2316	8899	8525	8293		2.27133	9123	8453	8344		2.25672	8788	8956	8242		2.14448	8475	9003	10338
2.23568	9056	8050	8606		2.2754	8494	8960	8244		2.26078	8488	8711	8318		2.14852	8518	8999	9535
2.23975	9149	8586	8084		2.27947	9298	8911	8368		2.26482	8596	8989	8343		2.1526	8489	8980	10023
2.24383	8838	8416	8670		2.28353	8897	9041	8884		2.26888	8528	8970	8292		2.15665	8686	9047	9342
2.24788	9213	9129	8136		2.28755	9080	7968	8381		2.27292	8405	8908	8075		2.16072	8400	9043	9715
2.25197	8699	8374	7717		2.29165	9598	8420	8874		2.27703	8144	8674	8325		2.16475	8063	9287	9503
2.256	8522	8188	8896		2.29568	9463	8667	8650		2.2811	8171	9006	8350		2.16882	8619	9263	9509
2.26008	8670	8354	8964		2.29975	8494	8936	8495		2.28518	8296	8635	7777		2.17285	8722	8969	9312
2.26415	9101	8797	8463		2.3038	8896	8986	8769		2.28925	8729	7968	8431		2.17693	7894	8803	9856
2.26823	8912	8862	8382		2.30788	8822	8924	8149		2.29333	8148	8554	8225		2.18097	8156	8971	9822
2.2723	9297	8342	8522		2.31193	9128	8804	8851		2.29737	8592	8441	8254		2.18503	8077	8749	9318
2.27638	8541	8324	8402		2.316	8762	8271	8585		2.30147	8058	8502	8183		2.18908	8400	9288	9361
2.28043	9270	8559	7994		2.32003	8257	8513	8315		2.30552	8320	8573	8764		2.19315	8397	8914	10343
2.28453	8784	8976	8017		2.3241	8911	8571	8117		2.3096	8346	8243	9123		2.19718	8479	8645	9201
2.28858	8617	8205	7974		2.32815	8446	8423	8226		2.31363	8619	8518	8131		2.20125	8690	8786	9583
2.29267	8623	8514	7787		2.33222	9066	8285	8230		2.31768	8162	8433	7911		2.20528	8179	9271	9361
2.2967	8687	8739	7612		2.33625	8137	8804	8453		2.32172	8440	8517	7928		2.20935	8020	9013	9660
2.30077	8898	8540	7908		2.34032	8514	8063	8572		2.32578	8016	8776	7888		2.2134	8250	8711	9111
2.3048	8929	8437	8112		2.34437	8416	8596	8178		2.32982	7964	8322	7910		2.21748	8115	8383	9494
2.30888	8801	8026	8081		2.34843	8200	8581	9377		2.33388	8085	7798	8064		2.22153	8487	8527	9491
2.31292	8995	8325	8300		2.35245	8004	8925	7763		2.33795	8543	8785	7930		2.22562	8268	9131	8950
2.31698	8311	8258	8332		2.35652	9004	8469	8074		2.34205	8089	8653	7686		2.22967	8504	8436	8666
2.32105	8179	8246	7688		2.36055	8503	8510	8226		2.34608	7859	8108	7927		2.23372	8677	8536	9402
2.32513	8687	8183	8335		2.36462	8647	8057	8068		2.35013	7867	8499	8158		2.23778	8026	8477	9195
2.32918	8464	8157	8266		2.36865	8389	8559	7946		2.35417	8015	7984	7745		2.24185	8388	9131	9241
2.33327	8685	8540	7690		2.37273	7903	8011	8539		2.35823	8043	8299	7647		2.24588	8296	8320	9106
2.33732	8521	8263	8052		2.37677	8167	8463	7762		2.36228	8255	8035	8102		2.24997	8311	9306	9713
2.34138	8352	7803	8105		2.38083	8493	8478	7835		2.36635	8029	8158	8338		2.254	8224	8797	9350
2.34543	8749	8051	7754		2.38487	8727	8251	8080		2.3704	7675	8032	7461		2.25808	8045	8588	9120
2.3495	8340	8402	8285		2.38893	8093	8223	8280		2.3745	7913	7477	7713		2.26215	8010	8386	8772
2.35353	8316	8275	7537		2.39297	8154	8225	8260		2.37852	7802	8227	7555		2.26622	8144	8488	9578
2.35758	8215	8269	7823		2.39702	8058	8087	8248		2.3826	7646	7796	7705		2.27025	7764	8491	9484
2.36162	8458	7952	7914		2.40107	8099	7949	8019		2.38665	7503	7915	7752		2.27433	7860	8684	9191
2.3657	8125	9079	8031		2.40513	7644	8203	8345		2.39072	7696	7944	7481		2.27837	8247	8234	8761
2.36975	8254	8327	8005		2.40918	8039	8568	8089		2.39475	7761	7948	7530		2.28243	8297	7795	9278
2.37383	8232	8355	8240		2.41323	8035	7928	8497		2.39882	7647	7906	7784		2.28647	8208	8477	9118
2.37787	8164	7726	7886		2.41728	7423	8051	7977		2.40285	7913	8284	7631		2.29053	8047	8555	9340
2.38193	8199	7412	7513		2.42137	8200	8195	8079		2.40692	7525	7815	7808		2.29458	8046	7744	9392
2.38597	8790	8625	8777		2.4254	7874	8315	7950		2.41097	7859	8090	7444		2.29865	7877	7939	9046
2.39005	8065	7999	7987		2.42947	7634	7722	8676		2.41502	7896	7551	7886		2.30267	8465	8482	8931
2.39408	8141	7912	7699		2.43352	8048	8131	7851		2.41905	7721	7651	7529		2.30673	7754	8626	8538
2.39813	8166	8291	7495		2.43758	8163	7565	7909		2.42308	7804	8145	7855		2.31078	7745	8495	9093
2.40218	7999	8250	7502		2.44163	7547	7546	7696		2.42712	7839	8034	7423		2.31483	8115	8504	8285
2.40625	7966	7962	8046		2.4457	7973	8288	8028		2.43118	7260	7325	7112		2.31888	8528	8515	8693
2.4103	8171	8167	7666		2.44973	8032	7913	8298		2.43523	7895	7656	7429		2.32295	7679	8412	8908
2.41437	8288	8340	7588		2.45378	7738	8214	8093		2.4393	7770	7481	7425		2.327	8249	8144	8699
2.4184	8166	7937	8100		2.45782	7909	8441	7965		2.44335	7789	7594	7776		2.33107	8122	7766	8805
2.42248	7924	7827	7648		2.46188	7907	8271	7550		2.4474	7782	7652	7120		2.3351	8148	8152	8757
2.42653	7901	7902	7993		2.46593	7796	8255	7984		2.45145	7912	7621	7432		2.33915	7836	7808	9637
2.43062	8263	7570	7726		2.47002	7982	8064	7452		2.45552	7326	7769	7379		2.34318	8031	7832	8413
2.43465	7819	7786	7291		2.47407	7527	8000	8108		2.45957	8024	7477	7708		2.34725	7540	8039	9005
2.43873	8173	8257	7645		2.47812	7855	7911	7397		2.46363	7492	7887	8300		2.3513	8029	7586	8326
2.44278	7992	7675	7692		2.48215	7909	7819	7664		2.46767	7097	8402	8136		2.35537	7838	8059	8883
2.44687	7759	7812	7686		2.48623	7780	7913	7633		2.47173	7334	7504	7750		2.35938	7733	8118	8395
2.45092	7728	7711	7482		2.49025	8105	8122	7894		2.47577	7134	7875	7454		2.36347	8187	8182	8400
2.455	8411	7438	7609		2.49433	7934	7975	8078		2.47983	7998	7957	7374		2.3675	7541	8108	8371
2.45903	7821	8328	7669		2.49837	7924	8075	7985		2.48388	7933	7714	7846		2.37157	8151	8141	8823
2.4631	7924	8759	7476		2.50243	8035	7737	7979		2.48795	7935	7893	7382		2.3756	7667	7911	8846
2.46715	7779	8028	7332		2.50647	7477	7945	7533		2.492	7553	7293	7418		2.37965	8439	7978	7993
2.47122	7038	7775	7378		2.51052	7459	7650	7445		2.49605	7323	7700	7943		2.38368	7733	7625	8749
2.47527	7930	7484	7650		2.51455	7977	7656	7654		2.50008	7441	7740	6922		2.38775	7959	8181	8169
2.47935	7917	8291	6882		2.51862	7649	7810	7916		2.50415	7480	7959	7278		2.39178	7867	7980	8920
2.48338	7232	7983	7882		2.52267	8161	7898	8133		2.5082	7445	7845	7631		2.39588	7580	8598	7917
2.48743	7880	7470	7572		2.52675	7992	7920	7544		2.51227	7456	8157	7499		2.3999	7940	7882	8146
2.49148	7521	8068	7978		2.53078	7123	8233	7901		2.51632	7899	7974	8114		2.40397	7915	8349	8538
2.49557	7631	8118	7786		2.53483	7798	7769	8065		2.52038	7520	7482	7560		2.40802	7741	8001	8362
2.49962	7975	7748	7690		2.53888	8280	7853	7846		2.5244	8359	8290	7207		2.41208	7629	8583	8327
2.50367	8411	8019	7814		2.54298	7582	7988	7176		2.52847	7796	7702	8477		2.41612	8035	7774	8430
2.50773	8177	8134	7650		2.547	7237	8114	7471		2.53252	7378	7882	7169		2.42018	7735	7944	7864
2.51178	7453	7585	7443		2.55105	7874	7599	7935		2.53658	7601	7660	7632		2.42422	7374	7890	8653
2.51582	8118	7789	8094		2.5551	7918	7867	8150		2.54063	7702	7443	7319		2.4283	7865	8111	7920
2.51987	7435	7601	8292		2.55917	7517	7725	7718		2.54468	7264	7388	7821		2.43233	8166	7733	8205
2.5239	7959	7508	7338		2.5632	7580	7707	7484		2.54873	7711	7635	7745		2.4364	7153	7735	8283
2.52797	7907	7906	6915		2.56727	7656	7998	7526		2.55278	7569	7407	7502		2.44045	7795	8078	7884
2.53202	8123	7985	7597		2.57132	7973	8135	7977		2.5568	7709	7485	8010		2.44453	7342	7330	7677
2.53607	7340	7696	7638		2.57538	7700	7457	8251		2.56085	6923	8018	7612		2.44855	7684	7558	8186
2.54008	7860	7619	8056		2.57943	7653	7676	7182		2.5649	7508	8081	8076		2.45262	7236	8189	8167
2.54415	7937	7935	7182		2.5835	8271	7911	7612		2.56895	7242	7562	7548		2.45665	7484	7858	7984
2.5482	7651	6865	7863		2.58755	7496	7969	8199		2.573	7213	7186	7293		2.46072	7278	7618	7980
2.55227	7958	7822	7541		2.59162	7722	8145	7056		2.57707	8123	7795	7534		2.46475	7701	7704	8421
2.55632	7903	7691	7534		2.59567	7269	7838	7698		2.5811	7223	7802	8137		2.46883	7648	7849	8302
2.5604	7866	7181	7572		2.59973	8064	7908	7553		2.58515	7076	7511	7924		2.47287	7299	7902	8121
2.56443	7590	7289	7427		2.60378	7295	7859	8128		2.58918	7521	7543	7764		2.47693	7823	7646	8316
2.56848	7923	6995	7550		2.60785	7150	7151	7615		2.59323	7617	8074	7804		2.48098	7675	7280	8118
2.57253	7361	7380	7308		2.61187	7354	7788	7546		2.59728	7671	7169	7401		2.48505	7755	7810	8660
2.57662	8035	7591	7487		2.61593	7671	7003	7473		2.60135	7482	8060	7422		2.4891	6962	7501	8101
2.58067	8095	8325	7144		2.61998	7761	7838	7274		2.6054	7313	7216	7509		2.49318	8093	8138	8158
2.58473	7515	7974	7287		2.62405	7674	7275	7496		2.60947	7579	6705	7644		2.49722	7085	7757	7808
2.58877	7955	7633	7383		2.6281	7538	7688	8188		2.61352	7355	7625	7609		2.50128	7674	7504	8254
2.5928	7569	7956	7756		2.63215	7875	7400	8017		2.61757	7430	7708	7873		2.50533	7470	7375	8238
2.59685	7766	7486	7579		2.6362	7712	7539	6955		2.62162	7402	7520	7293		2.5094	7868	7227	7852
2.60092	7346	7807	7632		2.64025	7472	7801	7387		2.62568	7468	7802	7147		2.51343	7736	7348	8641
2.60495	8142	7372	7503		2.6443	7493	7662	7580		2.62972	7043	7956	7122		2.51752	7043	7328	8134
2.60902	7966	7398	7733		2.64835	8232	7717	7483		2.63377	6754	7284	7152		2.52153	7161	7637	8145
2.61307	7505	7565	7619		2.65238	7656	7139	7377		2.6378	7470	7676	7139		2.52562	7084	7675	7776
2.61715	7672	8162	7310		2.65645	7259	7739	7385		2.64187	7713	7355	7505		2.52963	7413	7975	8196
2.62118	7974	7460	7548		2.66048	7900	7252	7965		2.64592	7116	7418	7310		2.5337	7460	7205	8145
2.62525	8360	7369	7762		2.66455	7078	8207	7590		2.64998	7817	7085	7397		2.53775	7705	7621	8059
2.62928	7734	7692	7381		2.66858	7594	7785	7749		2.65403	7313	6806	6866		2.54182	7140	7912	8094
2.63333	7731	7981	7645		2.67263	8018	7788	7247		2.65808	7208	7171	7644		2.54585	7485	7320	7757
2.63738	8344	8161	7673		2.67668	7280	7245	7956		2.66213	7674	7316	7456		2.54992	7930	7567	8436
2.64145	7367	7853	7511		2.68073	7805	7801	7294		2.6662	6958	7432	7187		2.55393	7084	7606	7974
2.64547	7105	7307	7681		2.68477	7623	7687	8004		2.67023	7597	8169	7117		2.558	7378	7336	8025
2.64952	7700	7217	8061		2.68883	7618	7934	7257		2.67428	7868	7922	7471		2.56203	7168	7815	7914
2.65355	7428	7328	7317		2.69288	7641	7842	8024		2.67833	7652	7601	7617		2.56608	7777	7024	7644
2.6576	7699	7554	7513		2.69695	7599	7612	7415		2.68238	7601	7763	7354		2.57012	7381	7324	8139
2.66163	7584	7571	7413		2.70097	7373	7995	7560		2.68643	7840	7231	7642		2.5742	7935	7182	8320
2.66568	7735	7205	7355		2.70503	7585	7526	7891		2.69048	7067	7411	7719		2.57825	7127	7443	7958
2.66973	7928	7576	7576		2.70907	8023	7660	7140		2.69452	7694	7827	7230		2.58232	7469	7648	7959
2.67377	7209	7928	7640		2.71312	7305	7627	6918		2.6986	7579	7494	7312		2.58635	7713	7776	7751
2.67782	7802	7709	7288		2.71717	7092	7826	7624		2.70263	6758	7665	7292		2.59042	7974	7874	7375
2.6819	7622	7492	7361		2.72123	7565	7966	7284		2.7067	7158	7107	7561		2.59445	7309	7489	7772
2.68593	7229	7552	7722		2.72525	7624	7917	8190		2.71075	7799	7206	7487		2.59852	7827	7633	7966
2.68998	7695	7668	7239		2.72932	7795	7501	7476		2.71482	6993	7912	7466		2.60257	7125	7480	7852
2.69403	7825	7896	7495		2.73337	7407	7618	7459		2.71887	6793	7914	7506		2.60662	7712	7257	7884
2.69808	7980	7859	7264		2.73743	7729	7717	7796		2.72293	7322	7590	7450		2.61063	7457	8106	8137
2.70213	7885	7689	7645		2.74148	7631	7377	7751		2.72697	7195	7706	7131		2.6147	7224	7335	7708
2.7062	6856	7646	7584		2.74555	6968	7724	7493		2.73103	7364	7699	7128		2.61873	7292	7912	8483
2.71023	7619	7322	7453		2.74957	7392	7520	7804		2.73508	7465	7436	7915		2.6228	7435	7335	8174
2.7143	7536	7268	7787		2.75362	7841	7751	7633		2.73915	7450	7913	7480		2.62682	7402	7804	7685
2.71835	7924	7674	7576		2.75767	7320	7467	7234		2.74318	7544	7707	7955		2.6309	7442	7817	7706
2.7224	7588	7391	8009		2.76173	8008	7674	7266		2.74727	7416	7640	7371		2.63492	7049	7012	7473
2.72645	7460	7389	7521		2.76578	7686	7479	7029		2.7513	7502	7808	7186		2.63897	7174	7794	8280
2.7305	7436	7604	7607		2.76985	7696	7565	7592		2.75538	7494	7722	7458		2.643	7076	7865	8205
2.73455	7494	7057	7379		2.77388	6680	7799	7349		2.7594	7226	7252	7111		2.64708	7194	7336	7861
2.73862	7493	7399	7037		2.77793	7830	7776	7693		2.76347	7283	7246	7348		2.6511	7337	7938	7728
2.74267	7306	7231	7739		2.78197	7704	7724	7163		2.76752	6823	7391	7525		2.65515	7587	7431	8025
2.74673	7855	7677	7433		2.78605	7401	7269	7572		2.77158	7929	7485	7341		2.65917	7276	7323	7273
2.75078	7450	6931	7929		2.79008	7804	7438	7808		2.77562	6947	7329	7166		2.66323	7187	7393	7614
2.75483	7691	7582	6733		2.79413	7239	7494	7310		2.77968	7785	7825	6621		2.66725	7305	7650	7879
2.75888	7540	7832	7737		2.79817	7387	7470	7592		2.78373	7322	7470	7004		2.67132	7419	7699	8030
2.76295	7774	7319	7271		2.80223	7493	7746	7410		2.7878	7474	7453	7511		2.67535	6943	7348	7497
2.76698	6853	7407	7513		2.80627	7490	7353	7625		2.79185	7332	7952	7271		2.67942	7982	7643	7629
2.77105	7440	7616	7590		2.81033	7095	7695	7726		2.79592	7549	7326	6984		2.68345	6978	7565	8236
2.7751	7282	7442	7684		2.81437	7742	7686	7628		2.79997	7125	7521	7474		2.6875	7821	7768	8077
2.77917	8052	7223	7167		2.81842	7431	7541	7611		2.804	7272	7740	7674		2.69153	7583	7188	8054
2.7832	7686	7470	7385		2.82247	7189	7753	8148		2.80805	7323	7529	7539		2.6956	7555	7188	7689
2.78728	7397	7531	7503		2.82653	7242	7414	7467		2.8121	7177	7422	7258		2.69962	7254	7148	7820
2.79132	7657	7469	7374		2.83058	7509	7385	7448		2.81613	7216	7785	7339		2.70368	7251	7495	8049
2.79537	7440	8090	7199		2.83465	7637	7781	7349		2.8202	7683	7491	7069		2.70773	7314	7813	8102
2.79942	7600	7435	7474		2.83868	7518	7805	7202		2.82425	7063	7189	7130		2.71178	7238	7231	7717
2.80348	7939	7328	7479		2.84277	7532	6947	7531		2.8283	7453	6985	7087		2.71582	7321	7291	7569
2.80753	7432	7462	7544		2.8468	7395	7340	7225		2.83233	7400	7402	7985		2.71987	7183	7321	7698
2.81158	7737	7590	7724		2.85087	7715	7671	7784		2.83638	7138	7462	7259		2.7239	6906	7266	8005
2.81562	7082	7621	7592		2.8549	6980	8213	7371		2.84042	7209	7986	7189		2.72795	6914	7250	7649
2.81968	7677	7816	7659		2.85897	7847	7743	7098		2.84447	7104	7516	7865		2.732	7299	7384	7566
2.8237	7217	7715	7610		2.863	7689	7521	7067		2.84852	7205	7704	7112		2.73605	7160	8021	7435
2.82775	8026	7464	7848		2.86707	7728	7039	7616		2.85257	6771	7521	7645		2.74008	7714	7701	7357
2.8318	7628	7581	7209		2.8711	7456	7096	7338		2.8566	7180	7616	7184		2.74415	7454	7389	7699
2.83585	7457	7451	7628		2.87517	7676	7381	7449		2.86067	7131	7387	7105		2.74817	7203	7363	7653
2.83988	7454	7027	7842		2.8792	7300	7380	7372		2.86472	7529	7280	7082		2.75222	6797	7470	7877
2.84393	7309	7048	7486		2.88325	6986	7372	6881		2.86878	7021	7387	7520		2.75625	6682	7052	7659
2.84798	7273	7036	6957		2.88728	7440	7645	7149		2.87283	6958	7519	7499		2.7603	7341	7498	7845
2.85205	8007	7325	7466		2.89135	7627	7749	7305		2.87692	8152	7062	7409		2.76433	7208	7114	7587
2.8561	7256	7754	7307		2.89537	7161	7780	7368		2.88097	7418	7632	7978		2.76838	7333	7516	7847
2.86018	7573	7200	7114		2.89943	7775	7794	7631		2.88505	7828	7140	7259		2.77242	7141	7296	7629
2.86427	7791	7434	7777		2.90347	7985	7353	7096		2.8891	7635	7500	7086		2.77647	7598	6894	7828
2.86832	7378	7923	7304		2.90752	7567	7693	7363		2.89315	7626	7443	7336		2.78048	7057	7417	7912
2.87237	7184	7208	7270		2.91157	7689	7710	7989		2.8972	7518	7446	7271		2.78453	7598	7372	7828
2.87642	6786	7255	7349		2.91562	7347	7768	7485		2.90125	7056	7542	7452		2.78857	7826	7304	7334
2.88047	7757	7995	7512		2.91967	7513	7094	7245		2.9053	6975	7591	6855		2.79263	7638	6754	7257
2.88453	7116	7429	7626		2.92375	7362	7553	7003		2.90935	7239	7064	7987		2.79668	7306	7313	7531
2.88858	7377	7839	7023		2.92778	7562	7325	7238		2.91338	7197	7828	7634		2.80073	7844	6949	7832
2.89267	7305	7210	7204		2.93185	7939	7529	7109		2.91745	7314	7505	7035		2.80477	7352	7723	7191
2.8967	7661	7996	7671		2.93588	7293	7251	7291		2.92148	7695	6984	6895		2.80882	7092	7125	7883
2.90077	7442	7385	7559		2.93995	7615	7521	7571		2.92555	7295	7695	7498		2.81287	6854	7298	8142
2.90482	7526	7549	7149		2.94397	7455	7693	7576		2.9296	7117	7076	6849		2.81692	7331	7357	7634
2.90888	6751	7832	7482		2.94803	7522	7476	7484		2.93367	7026	7144	7374		2.82095	6985	7296	7603
2.91293	7172	7597	7349		2.95207	7363	7947	7297		2.9377	7558	7510	7392		2.82502	7329	7226	7890
2.91698	7678	7880	6970		2.95612	7368	7989	7094		2.94175	7090	7136	7555		2.82905	6918	7278	8120
2.92103	7352	7470	7283		2.96015	7627	7362	7167		2.9458	6856	7292	6965		2.8331	7253	7461	7706
2.92507	7153	7578	7462		2.96422	7282	7283	7439		2.94987	7558	7682	7557		2.83715	6849	7404	7305
2.9291	7056	7638	7657		2.96825	7825	7802	7250		2.95392	7433	7621	7565		2.84122	6947	6972	7572
2.93317	7492	7705	6759		2.97232	8020	7630	6998		2.95798	7403	7562	7208		2.84525	7467	6917	7562
2.93722	7940	7519	7284		2.97635	7670	7820	7521		2.96205	7261	6896	7430		2.8493	7253	7461	7337
2.94128	7122	7403	7248		2.98042	7491	7584	7292		2.9661	6901	7956	7377		2.85333	6778	7296	7645
2.94532	7467	7510	7309		2.98445	7251	7067	7620		2.97012	7361	7720	7336		2.85738	7082	7317	7289
2.9494	7221	7793	7344		2.9885	8200	7283	7385		2.97418	7223	7224	7233		2.8614	6701	6988	7631
2.95343	7379	7581	6914		2.99253	7543	7801	6964		2.97823	7156	7435	7340		2.86548	6844	7540	7444
2.9575	7215	7843	7247		2.99668	7567	7311	7089		2.9823	6769	7400	7459		2.86953	6886	7330	8089
2.96155	7391	7908	7655		3.00073	7538	7234	7410		2.98635	7287	7176	7533		2.8736	7144	7573	7543
2.9656	6897	7362	7455		3.00478	7431	7493	6839		2.9904	7147	8138	6912		2.87763	6998	7333	7978
2.96965	7282	8004	7386		3.00883	7508	7669	7500		2.99443	7166	7343	7784		2.8817	6879	7689	7297
2.9737	7924	7272	7418		3.01287	8071	7689	7480		2.99848	7280	7569	7129		2.88575	7088	6853	7667
2.97773	7261	7404	7318		3.01692	7562	7587	7734		3.00253	7184	7292	6504		2.8898	7369	7664	7372
2.9818	7315	7696	6915		3.02097	7417	7161	7505		3.00658	7332	7121	7401		2.89385	7298	7080	7561
2.98582	7169	7242	7128		3.02503	7309	7702	7403		3.01063	7524	7008	7431		2.89792	7051	7727	7183
2.98987	7471	7733	7012		3.02905	7447	7728	7008		3.0147	6999	6760	7640		2.90195	7545	7618	7443
2.99392	7525	7522	7204		3.03312	7392	7633	7643		3.01875	6861	7604	7614		2.906	6833	7216	7351
2.99797	7059	7281	7256		3.03715	7704	7093	7201		3.0228	7308	7258	7143		2.91003	7335	7326	7574
3.002	7497	6999	7125		3.04122	7488	7348	7485		3.02683	7768	7783	7478		2.91408	7082	7092	7528
3.00608	7929	7130	7421		3.04525	7057	7668	7343		3.0309	7221	7479	7207		2.9181	6781	7414	7551
3.01012	7145	7128	7150		3.04932	7445	7679	6987		3.03492	7298	7533	7059		2.92217	7840	6569	7360
3.01417	7412	7038	7422		3.05335	7520	7035	7551		3.03898	7002	7487	7521		2.9262	6895	7492	7710
3.0182	7620	7897	7036		3.0574	7366	7415	7447		3.04302	6890	7373	7441		2.93025	6908	6804	7820
3.02227	7179	7226	7026		3.06145	7645	7460	7252		3.04708	7366	7481	7072		2.93428	7107	6950	7756
3.02632	7303	7185	7559		3.06552	7730	7343	7434		3.05113	7373	7649	7419		2.93835	6979	7653	7725
3.03035	7463	7525	7223		3.06957	7388	7769	7986		3.05518	7487	7987	7015		2.94238	6676	7218	7633
3.0344	7597	7223	7261		3.07362	7473	7417	7394		3.05923	7473	6992	7424		2.94645	7198	7222	7712
3.03847	7390	7330	7153		3.07765	7156	7617	7527		3.06328	7462	7821	7473		2.95048	6910	7303	7508
3.04252	6679	7221	6792		3.08168	7595	8034	7562		3.06733	7230	7103	7070		2.95453	7323	6799	7864
3.04657	7934	7425	6768		3.08572	7962	7535	7422		3.07138	7242	7270	6912		2.95858	6911	7112	7561
3.05062	7460	8076	7290		3.08978	7460	7439	6804		3.07542	7134	7317	6949		2.96265	7252	6837	7510
3.0547	7559	7517	7282		3.09382	7363	7974	7192		3.0795	7154	7218	7357		2.9667	6740	7786	7432
3.05873	7457	7160	7087		3.09787	7338	7433	7233		3.08353	7575	7509	6869		2.97073	7046	7627	8070
3.0628	7131	7181	7436		3.1019	7303	7265	7386		3.0876	7502	7271	7649		2.97477	7039	7557	7254
3.06683	7586	7790	7112		3.10595	7053	7142	6973		3.09165	7212	7278	7435		2.97883	7370	7102	7444
3.07088	7141	7475	7304		3.10998	7379	7578	6948		3.09572	7316	7445	7310		2.98287	6841	7210	7032
3.07492	7274	7225	7414		3.11405	7612	7247	7687		3.09977	7475	7251	7017		2.98693	7186	7260	7631
3.07898	7164	7175	7574		3.11808	7685	7657	7626		3.10383	7135	7166	7497		2.99097	7138	7351	7456
3.08302	7200	7535	7027		3.12213	7002	7219	6650		3.10787	6969	6810	7087		2.99503	6642	7155	7569
3.08708	7376	7847	7333		3.12617	7808	7309	7561		3.1119	7232	7282	7407		2.99905	6809	7400	7226
3.09113	7220	7406	7004		3.13023	7475	7992	7026		3.11595	7869	7423	6954		3.0031	7482	6978	7208
3.09518	7745	6976	7214		3.13425	7279	7800	7484		3.12002	7678	7191	6877		3.00715	6987	7273	7108
3.09927	7315	7364	7342		3.13832	7455	7133	7251		3.12407	6907	7009	7517		3.0112	7472	7177	7362
3.10332	7558	7761	7300		3.14237	7612	7339	7426		3.12813	7378	7639	7059		3.01523	7201	6798	7795
3.10735	7408	7345	7047		3.14642	7463	7810	7352		3.13217	7188	6981	7318		3.0193	6743	7197	7255
3.11142	7399	7358	7336		3.15045	7484	7819	7184		3.13622	6955	7175	7436		3.02335	7315	7225	7116
3.11543	7269	7244	7828		3.15452	7481	7988	7367		3.14027	6775	7261	6978		3.02742	6894	6837	7410
3.1195	7300	7719	7246		3.15853	7639	6976	7349		3.14432	7045	7081	6978		3.03143	6515	6958	7069
3.12355	7520	7527	6787		3.16262	7761	7422	7569		3.14837	7615	7640	7148		3.0355	7249	7012	7509
3.12762	7497	7154	6920		3.16663	7345	7300	7035		3.15243	7852	6948	6993		3.03955	6640	6454	7322
3.13167	7031	7161	6794		3.1707	7513	6985	6945		3.15647	7179	7114	7627		3.04362	6644	7242	7138
3.13572	7176	7087	7025		3.17475	7587	7331	6970		3.16055	7119	7032	7160		3.04765	7343	7004	7132
3.13977	7487	7450	6904		3.1788	7440	7413	7150		3.16458	7628	6942	7435		3.05172	6687	6698	7273
3.14383	7148	7620	7143		3.18283	7471	6841	7426		3.16865	7059	7352	7290		3.05575	7233	6884	7476
3.14788	7088	7252	7185		3.18688	7322	7501	7305		3.1727	8008	6888	7074		3.05982	6936	7151	7320
3.15195	7478	7037	6984		3.1909	7143	6856	7164		3.17675	6688	7529	7154		3.06385	6836	6741	7220
3.156	6998	7240	7106		3.19497	7636	7173	7279		3.1808	7075	7656	7219		3.0679	6958	7149	7662
3.16008	7872	7363	7234		3.199	7326	7325	6861		3.18485	7391	7223	7319		3.07195	6741	7187	7450
3.16412	7336	7383	7104		3.20308	7211	7338	7288		3.1889	6823	7378	7038		3.07602	7518	6893	7103
3.16818	7440	7210	7096		3.20712	7801	7321	7549		3.19293	7709	7821	6756		3.08003	7534	6822	6936
3.17223	7436	7472	6764		3.21117	7543	7432	7700		3.19698	7167	7145	7063		3.08412	7436	6791	7444
3.1763	7067	7238	7240		3.2152	7219	6875	6875		3.20103	7363	7511	7194		3.08813	6751	6660	7338
3.18035	6641	6980	6897		3.21925	7566	7249	7782		3.20508	6810	6833	7187		3.09218	7223	7031	7455
3.1844	7733	7666	6220		3.22328	7677	7202	7320		3.20913	6916	6859	7073		3.09622	7454	7181	7470
3.18843	8077	7130	7012		3.22735	7085	7411	7246		3.21318	6674	6660	7318		3.10027	6729	7120	7484
3.19248	7080	7245	7325		3.23142	7530	7287	7470		3.21723	7144	7662	7331		3.10432	6732	7130	7858
3.19652	7545	7785	6715		3.23548	7138	7227	7457		3.22125	6902	7458	7101		3.10837	6944	7172	7196
3.2006	7186	7332	7188		3.2395	7936	7391	6793		3.2253	7686	7091	7295		3.11238	7289	7039	6895
3.20463	7117	7318	6947		3.24357	7320	7498	7150		3.22935	7025	7220	6746		3.11645	6541	7222	7127
3.2087	7322	7102	7083		3.24758	7564	7173	7180		3.23342	7387	6998	7215		3.1205	7146	6943	7393
3.21275	7727	7299	6903		3.25163	7443	7245	7151		3.23747	7037	7587	6932		3.12457	6898	7176	7105
3.21682	7465	7748	6785		3.25567	7453	6975	7555		3.24153	7268	7060	6927		3.1286	6984	6776	7516
3.22085	6868	7163	7026		3.25975	7184	7296	7288		3.24557	7441	7055	7122		3.13267	6666	7179	7563
3.22492	7426	7594	7392		3.26378	7511	7386	7415		3.24963	7246	7483	7026		3.13668	6691	6760	6931
3.22895	7210	7409	6966		3.26783	7418	6621	7103		3.25372	7037	7305	7388		3.14077	6731	7110	7168
3.23303	7043	7311	7128		3.27187	6910	7222	7719		3.25777	7160	6850	6828		3.1448	7093	6729	7671
3.23708	7117	7159	7214		3.27595	7212	7332	7109		3.26182	7594	6963	7450		3.14885	6754	7075	7157
3.24113	7425	7588	7017		3.27997	7437	7513	6928		3.26587	6897	6781	6954		3.15288	6833	7490	7237
3.24517	7302	7764	7419		3.28402	7144	7077	7291		3.26992	7153	7189	6594		3.15693	6516	7296	7364
3.24927	7148	7363	7320		3.28808	7281	7105	7460		3.27398	7469	7591	7274		3.16095	7037	7324	7160
3.25328	6997	6993	6857		3.29213	7037	7366	7384		3.27802	7289	7160	7393		3.16502	6992	7098	7897
3.25735	7304	6946	7281		3.29617	7305	7530	7235		3.28208	7244	6893	7246		3.16907	6735	6744	7395
3.2614	7345	6942	7268		3.30023	7812	7172	7107		3.28612	7350	6783	7551		3.1731	7066	7149	7164
3.26547	7121	7509	6411		3.30427	7880	7476	6965		3.29017	7242	7219	7268		3.17717	7098	6821	7525
3.26952	7334	7134	7280		3.30833	7549	7217	6832		3.29422	7068	7268	6797		3.18123	6972	7174	7104
3.2736	7353	7354	6956		3.31237	7360	7319	7073		3.29827	6995	7499	7101		3.18528	7436	7135	7072
3.27763	7258	7224	7042		3.31643	7251	7534	6883		3.30232	7539	6871	7282		3.18933	7101	7160	7691
3.2817	7109	7043	7302		3.32048	7528	7341	7372		3.30637	7085	6822	6721		3.19337	6829	6765	7008
3.28573	7236	7319	6787		3.32455	7954	7290	7248		3.31042	7280	7324	7203		3.19742	6829	6569	6808
3.2898	6946	7104	7432		3.32858	7042	7131	7328		3.31448	6930	6969	7202		3.20147	6398	7253	7403
3.29385	7521	7098	6989		3.33263	7293	7000	7193		3.31853	6910	7191	7058		3.20552	6724	7004	7255
3.29792	7890	6949	7086		3.33667	7463	7150	7604		3.3226	7130	7011	7194		3.20955	7002	6956	7074
3.30197	7786	7147	7461		3.34073	7446	7377	7268		3.32663	7082	7312	6696		3.21362	6536	7152	7057
3.30602	7434	7040	6990		3.34478	7228	7522	7352		3.33072	7146	6933	6730		3.21763	6754	6966	7332
3.31005	6976	7467	6730		3.34885	7074	7205	7494		3.33473	7293	7412	6759		3.22168	6761	7226	7232
3.3141	7395	7309	7016		3.35287	7453	7063	7213		3.3388	7100	7621	7900		3.22572	6871	6511	7441
3.31815	7315	7211	7296		3.35695	7515	7297	7194		3.34285	6946	7282	6647		3.22978	6835	6524	7190
3.32222	6830	6769	7112		3.36098	6875	7202	7326		3.3469	7135	7165	7191		3.23383	6968	7436	7454
3.32625	7135	7012	6658		3.36505	7096	7304	7037		3.35093	7829	7120	7016		3.2379	6712	7338	7531
3.33032	6979	7447	6672		3.36908	7352	7194	7616		3.355	7060	6931	7025		3.24195	6877	7169	7357
3.33437	6865	7130	6475		3.37315	7226	7456	7274		3.35905	6649	7288	7446		3.246	7169	7130	7034
3.33843	7284	7157	7520		3.37718	7336	7095	7167		3.36312	7153	6882	6941		3.25002	6463	7035	6934
3.34248	7172	7153	7104		3.38123	7533	7050	7246		3.36717	7260	7208	7208		3.25408	7198	7319	7576
3.34655	7099	6883	7370		3.38527	7169	7341	6575		3.37123	7107	7318	6868		3.25812	6900	7047	6948
3.3506	6686	6947	6920		3.38932	6973	7128	7061		3.37527	7110	7032	6719		3.26217	6980	7032	7026
3.35468	7115	7553	6744		3.39335	6878	7229	7470		3.37932	7074	7521	6992		3.26622	6924	7400	7080
3.35872	7276	7110	6999		3.39742	7018	7282	7263		3.38335	6668	6833	7048		3.27028	6788	7459	7091
3.36277	7298	7501	6781		3.40145	7413	6648	6977		3.38742	7209	6924	7169		3.2743	6988	6858	7499
3.36682	7019	7220	7565		3.4055	6835	6663	6900		3.39147	7304	7304	7038		3.27835	6782	7006	6941
3.37087	7271	7323	7203		3.40952	7142	7023	7321		3.39553	7461	6598	7211		3.28238	6947	7104	7264
3.3749	7043	6768	6872		3.41358	7620	7026	6876		3.39958	7489	7092	7425		3.28645	7023	6958	7204
3.37897	7167	6996	7254		3.41762	7155	7409	6824		3.40365	7320	6681	7296		3.2905	6499	6836	7127
3.383	7035	7305	6669		3.42167	6883	7557	7000		3.40768	7083	7164	7029		3.29455	6957	6905	6890
3.38705	7337	7326	6578		3.4257	7267	7029	7094		3.41175	7007	7084	7258		3.2986	6898	7146	7113
3.3911	7004	7196	7082		3.42975	6908	7464	7105		3.4158	7341	7049	6988		3.30267	6615	7083	6995
3.39517	6577	7068	7253		3.43378	7061	7067	7539		3.41985	7219	7056	7040		3.3067	6797	7326	6620
3.39922	7401	7256	7565		3.43783	7361	7001	7436		3.4239	6877	7400	6570		3.31075	6803	6776	6693
3.40327	7552	7616	7138		3.44187	7231	7131	6506		3.42795	7094	7036	7619		3.31478	6935	7294	7163
3.40732	6954	6742	6629		3.44593	6949	6865	6984		3.43198	6946	7321	7430		3.31885	6661	6880	7339
3.41137	6972	7536	6641		3.44997	7258	7071	6939		3.43605	6627	6529	7390		3.3229	6888	7138	6742
3.41542	7075	7086	7572		3.45402	7298	7506	6909		3.44008	7285	7115	6876		3.32697	7100	6364	6981
3.41948	6822	6830	6827		3.45808	7142	6640	7302		3.44415	7313	7987	7193		3.331	6750	7224	7176
3.42353	7474	7408	7400		3.46215	7131	7188	6411		3.4482	7413	7407	7126		3.33507	7035	7080	6641
3.4276	7586	7291	6872		3.46617	6863	6557	7017		3.45227	6804	6969	6953		3.33912	7187	6900	7079
3.43165	7426	7646	6882		3.47022	7067	6990	6946		3.45632	7192	7113	7090		3.34317	6627	6663	7172
3.43572	7121	8016	6608		3.47425	7324	7247	6911		3.46038	7081	6948	7273		3.3472	6993	6634	7066
3.43973	7346	7347	6838		3.4783	7321	6955	6580		3.46442	7019	6917	6735		3.35127	6742	6917	7026
3.44378	7176	6798	6930		3.48233	7011	6440	6754		3.46848	6857	7331	6982		3.3553	6583	6670	6926
3.44783	6878	7261	6698		3.48642	7293	6872	7622		3.47252	7616	6894	6740		3.35933	6533	7156	6707
3.4519	7037	7428	7395		3.49043	6589	7282	6965		3.47658	6430	7312	6939		3.36337	6959	6739	6808
3.45595	7176	6705	6933		3.4945	7195	7365	7364		3.48063	6894	6584	6997		3.36742	7102	7045	6835
3.46002	7088	6780	6742		3.49852	7572	7023	7305		3.48467	7133	7238	6672		3.37145	6772	6690	6885
3.46405	7316	7598	6587		3.50258	6307	7198	7430		3.48872	7267	7276	7040		3.3755	7068	6919	7404
3.46812	7670	6955	7133		3.50662	7172	6971	7257		3.49277	7576	7017	6568		3.37955	6853	7138	6866
3.47215	6647	6960	7056		3.51068	7290	7556	6919		3.49682	7269	6817	6798		3.38362	6262	7068	7141
3.4762	6915	7299	6968		3.51475	7201	7069	7237		3.50087	6820	7070	6966		3.38763	6958	6850	6726
3.48023	7602	6911	6766		3.51882	7252	6888	7285		3.5049	7556	7312	7148		3.39168	6796	6839	6944
3.4843	7367	7676	6718		3.52283	7004	6712	7148		3.50897	7427	7575	6781		3.39572	6681	7020	7118
3.48835	7034	6786	7665		3.5269	6947	6961	6390		3.513	7243	7014	7004		3.39978	6575	6599	6865
3.49242	7157	6774	7434		3.53093	6979	7094	7294		3.51705	6605	6573	6784		3.40383	6592	7415	7157
3.49645	7022	6931	6850		3.53498	7150	7366	7363		3.5211	7006	7237	6977		3.4079	6940	6702	6863
3.50052	7208	6786	6704		3.53903	6990	7079	7735		3.52515	7137	6836	6961		3.41192	6856	6910	6836
3.50453	7434	7054	6291		3.54308	6992	7110	7621		3.5292	7137	6890	6655		3.41597	6833	6816	6959
3.5086	7101	6904	6765		3.5471	7254	7139	7105		3.53327	6739	7223	6743		3.42002	6767	6600	6997
3.51263	7317	6896	6955		3.55117	7087	7249	6591		3.53732	7098	6948	7069		3.42407	6755	6637	6672
3.5167	6721	7041	7204		3.5552	6969	7036	7157		3.54137	6707	7049	7045		3.4281	7183	6827	6972
3.52073	7462	6975	6959		3.55925	7411	6907	7082		3.5454	6931	7178	6907		3.43217	7144	7081	6893
3.52478	7415	7060	6808		3.56328	7053	6788	7053		3.54948	7313	6553	6808		3.43622	6797	6633	7106
3.52882	6952	7054	7087		3.56733	7222	7440	7248		3.55352	7217	6689	7239		3.44028	6160	6749	7594
3.53287	7228	6996	6812		3.57137	6815	7181	6752		3.55758	7536	7008	7328		3.4443	6822	7015	7132
3.53692	6978	6749	7339		3.57543	7209	6864	6945		3.56163	7453	7491	6772		3.44838	6165	7175	7190
3.54102	7083	6856	6818		3.57945	6757	7661	6563		3.5657	6993	6800	6711		3.45242	6882	6631	6924
3.54505	6854	6930	6828		3.58352	7012	6934	6716		3.56973	7025	6602	6541		3.45647	7034	6713	6961
3.54912	7298	7477	7330		3.58755	6980	6975	6825		3.57382	7184	7410	6764		3.46052	6681	6755	6171
3.55318	7087	6917	6715		3.59162	7072	6918	6676		3.57785	7181	6296	7083		3.46457	6848	6733	6850
3.55725	6300	6700	6997		3.59565	7210	6964	6554		3.5819	7161	6885	7091		3.46858	7107	6913	6744
3.5613	7364	6857	6780		3.5997	7202	7018	7029		3.58595	7042	6969	6565		3.47263	6780	7209	7074
3.56537	6896	6944	7242		3.60372	7043	6994	6703		3.59002	7450	6663	6939		3.47667	6899	6732	6959
3.56942	7004	7051	6725		3.60778	7540	7186	7318		3.59405	6573	6538	6823		3.48072	6822	6599	7180
3.57347	7473	7025	6712		3.61182	7590	7102	7098		3.5981	6591	6547	6671		3.48477	6588	6595	6911
3.57752	6715	6635	7353		3.61587	7463	6681	7035		3.60212	7130	7086	6942		3.48883	6097	6624	6656
3.58158	6553	6675	7093		3.6199	6910	6848	6584		3.60618	7381	6667	6917		3.49288	6381	7018	7094
3.58563	6770	7193	6854		3.62395	6573	7022	6904		3.61023	7017	6899	7101		3.49695	7080	6594	6744
3.58968	6597	7168	6569		3.62797	7348	6820	6968		3.6143	7128	7372	6888		3.50097	6871	7177	6902
3.59372	7074	6969	6671		3.63202	6978	6909	7244		3.61835	6945	6884	7129		3.50503	6719	6848	7232
3.59778	7004	7032	7009		3.63605	6895	6981	7210		3.62242	7343	7151	7030		3.50907	6663	6826	6761
3.60182	6956	6713	7586		3.6401	7108	7508	6592		3.62647	7191	7245	6798		3.51313	6820	6539	6921
3.60588	6995	7166	6520		3.64413	7019	6712	6717		3.63053	6918	6619	6692		3.51717	7142	6877	6925
3.60993	6678	6831	6969		3.64818	7322	6808	7540		3.63455	6772	6618	6645		3.52122	6625	6556	7012
3.61398	6851	7048	6882		3.65222	6964	6307	6825		3.63862	7031	7236	7149		3.52525	6819	6555	6973
3.61803	6978	6492	6847		3.65627	7247	7145	7226		3.64265	6674	7003	6700		3.52933	7014	7052	6641
3.6221	6399	6771	7060		3.6603	6941	6848	7004		3.6467	7060	7068	6669		3.53335	6573	7000	7150
3.62613	6605	6877	7161		3.66437	6871	7034	7340		3.65073	6958	6516	7355		3.5374	6917	6561	6903
3.6302	6953	7301	6642		3.6684	6997	6746	6454		3.65478	6936	7226	7281		3.54143	6334	7270	6643
3.63427	7068	6953	7089		3.67245	6938	6321	7080		3.65883	6695	6847	6938		3.5455	5953	6395	7020
3.63832	7277	6818	6506		3.6765	7221	7239	6987		3.66288	6791	7447	6846		3.54953	6337	6341	6829
3.64237	7296	6772	6461		3.68057	6628	7047	7060		3.66693	6831	6831	7349		3.5536	6790	7165	6642
3.64643	6702	6857	7208		3.68458	6761	6985	7031		3.671	6505	6805	6632		3.55762	6542	6874	7044
3.65048	7146	7132	6412		3.68863	6667	7041	7039		3.67505	6599	7010	7477		3.56168	6695	6362	6983
3.65457	7291	6842	6810		3.69268	7431	6549	7536		3.67912	6812	7164	7160		3.56572	6541	6516	7372
3.6586	6881	6950	6793		3.69673	6932	7545	6561		3.68317	6884	7003	6486		3.56978	6901	6570	6838
3.66267	6589	7026	6634		3.70077	6814	6972	7077		3.68723	7247	7034	6445		3.57383	6646	6388	6760
3.66672	6950	6693	7200		3.70482	6748	7082	7118		3.69125	6944	7024	6742		3.5779	6803	6989	6702
3.67077	6989	6679	6380		3.70885	7325	6537	6900		3.69532	7089	6840	7105		3.58192	6784	6534	6724
3.67482	6899	6777	7039		3.7129	6933	7085	6559		3.69937	7061	6985	6771		3.58597	6607	6676	7127
3.67885	6757	6741	7234		3.71692	7148	7055	7506		3.70343	7288	7175	7083		3.59	6316	6929	7083
3.6829	6908	6881	6901		3.72098	6796	7095	6595		3.70748	6647	6710	6711		3.59407	6286	7186	7089
3.68697	7259	7036	7136		3.72502	6828	7189	6802		3.71153	6589	6925	6768		3.5981	6603	6746	7574
3.69102	6320	6644	6602		3.72907	7052	6665	6966		3.71558	6647	7093	7299		3.60217	6521	6512	6962
3.69508	6608	6742	6829		3.7331	7263	7020	6831		3.71963	6622	6734	6720		3.6062	6264	6478	6534
3.69912	6545	6870	6832		3.73717	7064	7187	7271		3.72368	7209	7078	7046		3.61025	6615	6596	7445
3.70318	6920	6979	6717		3.7412	7141	6667	6906		3.72775	6704	7073	6611		3.61428	6847	6244	6666
3.70722	6790	6544	7108		3.74527	6753	6993	7050		3.7318	6680	6719	7293		3.61833	6863	6614	6905
3.71128	6312	7089	6806		3.7493	7152	7161	7304		3.73585	6642	7088	6836		3.62237	6843	5962	6877
3.71533	6563	6612	6425		3.75337	6519	6415	6931		3.73988	6873	6861	6735		3.62642	6503	6635	7149
3.7194	7235	7029	6844		3.75738	6819	7092	7163		3.74395	7258	6868	6893		3.63045	6557	6748	6748
3.72345	6800	7005	6807		3.76143	6667	6858	7713		3.74798	6075	6636	6806		3.6345	6875	6929	7103
3.72752	7282	6901	6465		3.76547	7104	6656	6606		3.75205	6769	7264	6929		3.63853	6693	6983	6438
3.73157	7034	7141	6834		3.7695	6726	6465	6932		3.7561	6817	6803	7069		3.6426	6942	6904	6848
3.73563	7334	7525	6808		3.77353	6588	6798	7029		3.76017	6616	6758	6586		3.64663	6935	6747	6748
3.73967	7257	6774	6849		3.7776	7641	7045	6942		3.7642	6515	7009	6725		3.65068	6207	6278	6820
3.74373	6810	6625	6154		3.78163	7014	6522	6728		3.76828	6969	7034	6980		3.65472	6678	6645	7060
3.74778	7228	6747	6680		3.78568	6820	6798	6915		3.77232	6706	6726	7210		3.65877	6487	6645	6831
3.75183	6980	6760	7062		3.78972	6881	7201	7025		3.77638	6998	6712	7009		3.6628	6450	6673	6942
3.75588	6578	7040	7330		3.79375	6571	7116	6402		3.78042	7044	6928	6653		3.66685	6402	6706	6753
3.75995	6653	6813	6652		3.7978	6958	6941	6687		3.78448	6265	6761	7076		3.67087	6655	6808	7025
3.76398	7153	6791	6903		3.80187	7166	7775	6942		3.78852	6756	6792	6512		3.67493	6558	6837	6664
3.76805	6724	6989	6802		3.80588	6667	6997	6527		3.79258	7165	6954	6568		3.67895	6858	6732	6642
3.7721	6838	6715	6846		3.80993	7346	7012	7144		3.79662	6704	6634	6875		3.683	6647	6562	6902
3.77615	6668	6649	6908		3.81398	6847	6924	6464		3.80068	7159	7097	6347		3.68703	6683	6684	7050
3.7802	7088	7395	6862		3.81803	6600	7045	6792		3.80473	6782	7097	6881		3.69108	6704	6698	6553
3.78427	6938	6977	6540		3.82205	7169	6791	6814		3.8088	7141	6832	6913		3.6951	6808	6391	7099
3.78828	6795	6747	6523		3.82612	6860	7411	7073		3.81285	6897	6918	7049		3.69915	6789	6958	6633
3.79233	6738	6834	6632		3.83015	7303	6827	6679		3.81692	6271	6408	6734		3.70318	6771	7080	6613
3.79637	7004	6693	6859		3.8342	6999	6744	7101		3.82095	6637	6742	6864		3.70725	7091	6610	6464
3.80042	6904	6863	6796		3.83823	6711	6971	6981		3.82503	6570	6923	7087		3.71128	6364	7048	6567
3.80447	7114	6408	7025		3.8423	6601	6896	7138		3.82907	6876	6795	6804		3.71533	6501	6790	6928
3.80853	7355	6807	6629		3.84632	6698	6947	6951		3.83313	7078	7021	6867		3.71938	6793	6433	6873
3.8126	6772	7349	6697		3.8504	7243	7353	7143		3.83718	6444	7356	7043		3.72343	6858	6574	6647
3.81665	7109	6779	6700		3.85442	6221	7048	6993		3.84125	7033	6836	7084		3.72745	6739	6396	6764
3.8207	6436	6653	6680		3.85848	6722	6299	6755		3.84528	6943	6339	7161		3.7315	6512	6493	6859
3.82475	6378	6343	6638		3.86252	6988	7109	6669		3.84935	7358	6720	6925		3.73553	6607	6126	6997
3.82878	6609	6958	6544		3.86657	6788	7311	6761		3.8534	6519	6740	7332		3.7396	6711	7104	6481
3.83285	6772	6154	6773		3.8706	6946	6989	6727		3.85745	6713	6972	7248		3.74363	6769	6307	7030
3.8369	6546	7386	6527		3.87465	6527	6614	7279		3.8615	6680	7238	6826		3.7477	6837	6791	6529
3.84095	6805	7534	7142		3.87867	7178	7017	6764		3.86557	6595	6954	6708		3.75172	7059	6482	6932
3.845	6688	6930	6900		3.88273	6630	6980	6791		3.8696	6493	6906	6726		3.75577	6434	6311	6987
3.84907	7221	6660	6726		3.88675	7684	7080	6538		3.87367	6863	7109	7124		3.75978	6795	7319	6566
3.8531	7166	6865	6698		3.89082	6885	7523	6619		3.8777	6906	6852	6941		3.76385	6555	6960	6762
3.85717	6761	6883	7012		3.89487	6751	6965	7085		3.88177	6938	7045	7106		3.76788	6011	6542	6825
3.86122	6898	6627	6215		3.89893	6838	6754	6774		3.8858	7094	6922	6536		3.77195	6542	6998	6601
3.86528	6744	6812	6590		3.90295	7062	6870	7015		3.88987	6876	7251	7183		3.77598	6329	6616	6543
3.86932	6654	6598	6835		3.907	6600	6702	7063		3.89393	6820	7094	6988		3.78002	7122	7170	6783
3.87337	7176	6524	7251		3.91103	6835	6504	6623		3.898	6541	6673	7430		3.78405	6912	6937	6762
3.8774	7247	7249	6710		3.91508	7029	6393	7435		3.90202	6879	7689	7455		3.7881	6889	6961	6554
3.88145	7652	6660	7012		3.91912	6952	7156	6955		3.9061	6861	6551	7147		3.79217	7328	6626	7279
3.8855	6567	7383	7106		3.92318	6488	7103	7159		3.91013	7065	6994	7170		3.79622	6331	6527	6886
3.88955	6933	7030	6702		3.92723	6608	7602	6682		3.9142	6794	7146	7342		3.80025	6822	6256	6762
3.89358	6642	6298	6980		3.93127	7420	6971	6465		3.91822	6799	7036	6948		3.80433	6917	6810	6554
3.89767	7075	7203	6989		3.93532	6852	7176	6929		3.92228	6751	7073	7628		3.80835	6951	6373	6715
3.9017	6815	7205	7023		3.93938	6548	6922	6964		3.92633	6211	6833	6877		3.81242	6344	6421	6695
3.90577	6921	7254	6501		3.94342	6541	6999	7073		3.93038	6600	7087	7340		3.81643	6690	6616	6927
3.9098	6678	6526	6773		3.94747	7326	7047	6731		3.93443	6274	6492	6918		3.82052	6734	7310	6600
3.91385	6727	6928	6795		3.9515	6793	6795	7039		3.9385	6519	6635	7063		3.82453	6783	7074	6508
3.9179	6826	6776	6638		3.95558	6699	6732	7016		3.94255	6940	6882	7706		3.82858	7401	6821	6388
3.92197	6899	7348	6741		3.95962	6883	7945	6379		3.94662	7192	7372	7201		3.83262	6979	6866	6695
3.926	7391	7178	7617		3.96368	7153	6984	6889		3.95065	6974	7049	7317		3.83667	6771	6809	6985
3.93007	6814	7014	6972		3.9677	6809	7206	6839		3.95472	6942	7392	7495		3.84068	6774	6917	6958
3.93412	6582	6577	6947		3.97177	7033	7381	6865		3.95875	5784	6778	7601		3.84473	7375	6630	6243
3.93818	6862	6800	6838		3.9758	6549	7440	7140		3.96287	6649	6982	7549		3.84877	7119	6895	6852
3.94223	6786	7214	6789		3.97985	6880	7139	7119		3.96692	6415	7377	7687		3.85282	6992	7116	6974
3.9463	6547	6743	7004		3.9839	6496	6882	7024		3.97098	7017	7562	7060		3.85687	6639	6846	6648
3.95033	6474	7699	6845		3.98795	6857	7209	7167		3.97503	6310	6853	6479		3.86092	6777	7101	6998
3.9544	6920	7077	7377		3.99198	7013	6630	6781		3.9791	6582	7275	6984		3.86493	6899	6763	6878
3.95845	7295	7285	6698		3.99605	6911	7699	7091		3.98312	7014	6726	6924		3.869	7004	6987	7072
3.96252	6707	7407	7163		4.00008	7093	7322	7483		3.98717	7068	7124	7085		3.87302	6598	6861	7247
3.96657	7217	6893	6930		4.00413	6793	6594	6832		3.9912	7038	7401	7113		3.87708	6859	6740	6607
3.97063	6874	7257	6918		4.00817	7041	6806	6882		3.99527	7126	6939	6789		3.88113	7333	6826	6877
3.97465	7011	7077	7080		4.01222	7030	7777	6894		3.9993	6830	7451	7281		3.8852	6899	6676	7513
3.97873	6690	6949	7043		4.01625	6843	6957	6860		4.00335	7041	7002	7508		3.88923	6749	6998	6642
3.98277	7067	6642	6904		4.0203	6778	6795	7231		4.00738	6835	7547	7185		3.89328	6793	6854	6954
3.98683	6896	6689	7135		4.02433	7554	6949	6868		4.01145	7019	7036	7396		3.89733	6917	7035	6697
3.99088	7149	7149	7506		4.02838	6811	7603	6842		4.01548	7206	6941	7893		3.90138	7119	6974	6754
3.99493	6894	7006	6591		4.03242	6882	7357	7148		4.01955	6811	7230	7429		3.90542	6558	7190	6525
3.99897	7049	7468	7044		4.03647	7512	6791	6667		4.0236	6903	7232	7218		3.90948	7506	6752	7260
4.00303	7067	6915	7083		4.0405	7379	7053	7005		4.02768	6982	7813	7435		3.91353	6823	6869	6481
4.00708	6922	7063	7289		4.04457	7022	6902	7565		4.03172	6875	7211	7637		3.9176	7362	7667	7126
4.01113	6838	7082	7219		4.0486	6904	7075	6504		4.03578	6610	7416	7774		3.92163	6428	6798	6912
4.01518	7096	7261	7374		4.05265	6801	7205	6997		4.03982	6412	6784	7336		3.92568	6983	6736	7185
4.01927	7070	6992	6985		4.05668	6960	7197	7388		4.04387	7192	7207	7561		3.92972	7132	7008	7244
4.0233	7167	7006	6911		4.06075	7170	7192	7684		4.04792	7041	7571	7138		3.93377	6855	6918	7339
4.02735	6807	7399	6821		4.0648	7145	7154	7465		4.05198	6952	6943	7777		3.93782	6692	7140	7169
4.03138	6982	6671	7253		4.06887	7103	7313	7052		4.05603	7097	6969	7831		3.94188	6353	7124	6742
4.03545	7038	7444	7465		4.07288	7534	7073	6694		4.06008	6780	7355	7375		3.94592	7053	6995	6620
4.03948	7886	7220	7456		4.07693	7273	7110	7473		4.06412	6980	7350	7113		3.94997	6844	6615	7042
4.04355	7401	7361	7242		4.08097	6656	7321	7104		4.06815	7096	6718	7776		3.95398	6590	6598	7079
4.0476	7121	6986	7705		4.08503	7360	7304	7439		4.0722	6805	7462	7423		3.95803	6941	7578	7358
4.05168	7153	7513	7579		4.08907	7199	7620	6524		4.07627	7228	7298	7599		3.96207	6898	6645	6889
4.05573	7090	6831	7271		4.09312	7058	7232	6977		4.08032	6811	7215	7713		3.96612	7454	7054	7566
4.0598	7550	7146	6914		4.09713	7390	6786	7139		4.08438	7802	7171	7792		3.97015	6624	7156	7450
4.06383	6983	7493	7544		4.1012	7704	7271	6814		4.0884	7323	7528	7087		3.97418	6854	7161	6952
4.0679	7374	7492	6688		4.10522	7353	7377	6767		4.09247	6637	7444	7079		3.9782	7187	7068	6770
4.07195	7362	7186	7387		4.10928	7538	7708	7368		4.0965	6669	7362	7004		3.98227	6605	7316	7140
4.07602	7684	7744	7446		4.11333	6891	7217	7774		4.10055	7731	7279	7524		3.98628	6938	6635	7400
4.08007	7215	7484	7348		4.11738	7318	7674	7584		4.1046	7361	7163	7009		3.99035	6991	6598	7011
4.08413	7198	7428	6974		4.12142	7447	7089	7536		4.10867	7100	7241	7335		3.99438	6502	7072	7092
4.08817	7149	6995	7298		4.1255	7261	7766	7335		4.11272	7196	6729	7096		3.99845	6685	6970	6811
4.09222	7216	6803	6955		4.12952	7314	7494	7358		4.11678	7008	7151	7474		4.00248	6288	6761	7083
4.09627	7306	7048	6874		4.13357	7430	7014	7317		4.12082	7378	6969	7185		4.00653	6923	6989	7222
4.10032	7126	7103	7076		4.1376	7278	7272	7080		4.12488	6843	7224	7379		4.01055	6615	6940	7011
4.10433	7586	7452	7405		4.14165	7431	7518	7184		4.12892	7263	6822	7872		4.0146	6840	7102	6795
4.1084	7493	6776	7018		4.14568	7318	7002	7239		4.13298	7306	7186	7351		4.01865	6587	7018	7206
4.11243	6790	7392	6664		4.14975	7237	7570	7620		4.13702	7304	6842	7464		4.0227	6544	6829	7105
4.1165	7405	7186	7030		4.15378	7279	7749	7213		4.14108	6953	6915	7151		4.02672	7032	6749	7169
4.12053	7408	7653	6840		4.15783	7101	7856	7860		4.14512	7421	7094	6888		4.03078	6800	6880	7337
4.12458	7449	6878	7037		4.16185	7086	7414	7374		4.1492	7348	6599	7581		4.0348	6359	7093	7093
4.12862	7554	7523	7116		4.1659	7242	7312	7408		4.15322	7507	6936	7433		4.03885	6479	6881	7013
4.13267	7144	6870	7301		4.16993	7041	7119	7364		4.15728	7473	6874	7039		4.04288	6454	6831	6844
4.13672	6882	7241	6972		4.17398	7297	7011	7365		4.16132	6634	6573	7166		4.04695	6461	6880	7290
4.14077	6945	7208	6831		4.17802	7570	6979	7239		4.1654	7208	6689	7150		4.051	6806	6544	7565
4.1448	7197	7302	7118		4.18207	7093	7634	7229		4.16942	7551	7499	6865		4.05505	6967	7152	7374
4.14887	7329	7241	7202		4.1861	7061	7157	7655		4.17348	6789	6828	7311		4.05907	6489	6600	6974
4.1529	7198	7150	7174		4.19017	6997	7500	7364		4.17753	7209	6763	7038		4.06313	6352	6969	7782
4.15697	6784	6958	7102		4.19422	6854	7932	7726		4.18158	6858	6582	7392		4.06717	6301	6402	7518
4.16102	7073	6969	6671		4.19827	7672	7431	7409		4.18562	6729	6659	7362		4.07123	6444	6818	7053
4.16508	7041	7176	6857		4.20232	7540	7298	7380		4.18967	7300	6763	7779		4.07527	6830	6690	7367
4.16912	6675	7079	6395		4.20637	7127	7137	6995		4.19368	6929	6413	6869		4.07932	6336	6545	6888
4.17318	6934	7407	6739		4.21038	6889	7068	7213		4.19775	6889	6859	7667		4.08335	6826	6592	7178
4.17723	6967	7072	6764		4.21447	7258	7092	7719		4.20175	6726	6137	6972		4.0874	6256	7114	6822
4.1813	6847	6932	6298		4.21848	7229	7031	7255		4.20583	7199	6553	6490		4.09143	6429	7023	7460
4.18535	6905	7102	6671		4.22253	6863	7303	7084		4.20987	6977	6561	7084		4.0955	6215	7162	7265
4.18942	7192	6961	6664		4.22655	7088	6892	7493		4.21393	6766	6576	7348		4.09955	6238	6894	7294
4.19347	6568	6891	6526		4.23062	7267	7117	7707		4.21798	7235	6693	6800		4.1036	6206	6513	7063
4.19752	6737	6887	7014		4.23465	7058	7380	7452		4.22207	6971	6392	6737		4.10763	5747	6538	7077
4.20155	7430	6494	6588		4.23872	7440	6922	7272		4.22612	7160	6616	7422		4.11168	5857	6652	7347
4.20562	7167	6666	6454		4.24273	7023	6957	7547		4.23018	7078	6144	6918		4.11572	6011	7296	7090
4.20963	7103	7004	6374		4.24678	6818	7182	7253		4.23422	7143	6170	6577		4.11975	6085	6569	7722
4.2137	6736	6663	6196		4.25083	7188	7210	7180		4.23828	6697	6218	6656		4.12378	5883	6808	7931
4.21772	6664	6488	6394		4.25488	7457	6747	7294		4.24233	6756	6132	6401		4.12783	5419	6430	7278
4.2218	6239	6724	6331		4.25892	7410	7140	7044		4.24638	7091	6131	6206		4.13187	5567	6602	6939
4.22583	6543	6207	6352		4.26297	7280	7028	7030		4.25043	7148	6190	6298		4.13592	5999	6852	7341
4.23002	6901	6765	6450		4.267	7572	7212	6914		4.2545	6699	5658	6394		4.13995	6278	6859	7203
4.2341	6794	6317	6239		4.27103	6810	6290	7397		4.25853	7111	6110	7275		4.14402	5784	6400	7225
4.23813	6686	6206	5925		4.27507	6723	6547	6944		4.2626	6239	5806	26723		4.14805	5302	6485	7283
4.24217	6684	6255	5816		4.27912	6672	6785	6898		4.26662	6572	5937	135510		4.15208	6263	6673	7134
4.24622	6648	6436	6073		4.28317	6893	6794	6683		4.27068	6590	5448	331423		4.15615	9103	6147	7232
4.25028	6410	5992	5515		4.28722	7121	6905	7096		4.27472	6720	6213	1174837		4.17083	125837	6628	7015
4.2543	6839	6182	5583		4.29125	6824	6600	6668		4.27878	6660	23927	1528612		4.18602	1448342	6321	6888
4.25837	6707	6687	5638		4.2953	7432	6337	6777		4.28282	6802	95879	2643585		4.20197	2625516	5766	7197
4.2624	6585	6175	5765		4.29933	6415	6289	6923		4.28687	6550	833334	868995		4.21725	899325	6297	6571
4.26648	6817	6303	5603		4.30338	6844	6513	7193		4.2909	6692	1697096	477898		4.23222	432333	6253	6622
4.27052	6201	5872	5663		4.30742	6671	6543	7225		4.29497	6608	985933	172945		4.24717	87017	6091	6925
4.27457	6208	5866	5736		4.31147	6157	6319	6619		4.299	6579	941777	157844		4.26197	22972	6003	6437
4.27858	6457	6220	5244		4.3155	6699	6232	6969		4.30307	6770	251227	190134		4.27672	16805	6115	6633
4.28265	6562	6223	5683		4.31957	6466	6114	6736		4.30708	6358	147126	168611		4.29135	20846	5824	6487
4.28667	6210	5800	13842		4.3236	6389	5864	6624		4.31115	6468	183114	165376		4.30608	20664	6022	6449
4.29073	6037	5547	78264		4.32765	6733	6429	6780		4.31517	6239	142194	134057		4.3208	18583	9610	6153
4.29478	5959	5845	1180871		4.33167	6872	6114	6888		4.31922	5980	133670	117049		4.33547	23642	25387	6960
4.29888	5694	5584	695856		4.33572	6523	5644	6596		4.32325	6338	105338	258787		4.35015	34654	73348	20734
4.30293	5852	5755	1199415		4.33977	6236	6022	6328		4.32732	5823	75575	198918		4.36505	26907	154065	70725
4.307	5650	5603	671923		4.34382	6191	5777	7055		4.33137	6290	175472	105440		4.3799	19880	250076	882328
4.31103	5581	5269	404314		4.34783	6334	5820	6626		4.33543	6065	289934	44270		4.39467	19206	539897	1936060
4.3151	5704	10840	481884		4.35188	6475	5421	6417		4.33948	5856	137934	74470		4.40933	18932	323705	928679
4.31913	5864	69230	557129		4.3559	6134	5530	6596		4.34352	5989	63269	271944		4.42398	17343	114336	683428
4.3232	5579	1080937	181139		4.35995	5879	5161	6458		4.34755	5890	39032	184462		4.42812	17512	87410	197871
4.32725	5703	599062	125412		4.36398	6194	5484	5751		4.35162	5786	283252	241669		4.43225	18708	31536	134574
4.33132	6874	1099349	120432		4.36803	5953	6688	6293		4.35565	5664	255741	95264		4.44693	20601	27990	86537
4.33537	34860	958710	256212		4.37205	5670	40978	6321		4.3597	6140	197755	69026		4.4617	16528	27021	75200
4.35022	1086944	436846	212720		4.3761	5742	754999	6039		4.36373	5598	50915	73639		4.46582	16274	25225	53817
4.3663	733888	545099	197463		4.38013	5995	848757	6248		4.36782	5417	22684	57783		4.4699	14656	19980	50876
4.38168	1520858	633326	530461		4.38418	5356	1828953	6199		4.37182	5504	29947	47115		4.48453	14423	18488	45322
4.39723	640287	205969	267723		4.38822	5276	530710	5653		4.37588	5044	27428	52944		4.48867	14547	18910	37912
4.41242	377653	126659	247329		4.39227	6229	315932	5462		4.37993	7339	21905	62103		4.49278	13922	21435	34159
4.4278	286113	98248	201975		4.39628	18621	228341	5660		4.38403	34066	21622	306593		4.49688	13114	22358	34087
4.44303	520550	213482	254867		4.40045	97510	267670	5718		4.38823	126065	22638	231482		4.50098	13496	25969	33176
4.45847	945079	212173	326563		4.41552	1089373	665490	5348		4.40327	997258	27156	187438		4.50505	13094	24504	48325
4.47388	170665	155318	223659		4.43208	825237	414941	5746		4.41988	2028706	29301	216359		4.50915	13760	18486	57312
4.48875	92783	403422	132001		4.44758	1318129	229217	5568		4.43657	926227	31138	93077		4.51323	12994	19137	54501
4.50352	106657	303632	97895		4.46305	365309	106870	14100		4.45183	746428	30133	119952		4.51735	13643	18179	58352
4.5185	277590	281147	95504		4.47818	188765	231260	76871		4.46702	253146	23162	276897		4.52143	13167	18366	50126
4.53378	109335	227302	204227		4.49327	207327	343314	870297		4.48222	151214	20145	104066		4.52555	13678	18042	44935
4.54877	108078	204596	529683		4.50845	272672	128003	943927		4.49743	202143	20555	112186		4.52962	14041	17008	32461
4.5638	370368	234823	225928		4.52372	882284	194552	1242299		4.51275	133830	31043	154625		4.53373	13677	18137	30835
4.57923	242034	168032	213660		4.53923	344606	90117	409649		4.52803	155926	36659	84781		4.5378	13236	18422	31261
4.59428	278350	79541	212067		4.55425	164819	69286	247624		4.5435	128927	24414	98539		4.54192	13088	18582	33991
4.60948	236574	52417	162240		4.56935	94581	86793	255180		4.55888	104876	23139	159845		4.54597	13342	16601	205139
4.62475	218449	41143	436602		4.58432	226398	76282	295239		4.57422	373008	76461	143431		4.55008	13252	15897	187375
4.64015	308094	36902	103911		4.59962	313801	61959	671585		4.58968	312041	148022	103794		4.55413	13044	15667	112717
4.65565	196677	47971	104899		4.61498	143274	49628	298642		4.60447	181632	24760	354357		4.55822	13303	13829	100452
4.67103	118652	75121	147043		4.62998	210308	57621	175005		4.6192	52737	16438	177583		4.5623	13119	13360	82620
4.6864	62286	123751	230333		4.64505	116453	55573	116948		4.63392	105610	21164	97791		4.56642	13165	14258	123913
4.70137	48287	63746	247893		4.65995	67848	48153	287872		4.64892	600582	21138	51330		4.57052	14172	13516	180811
4.7163	43262	39510	88422		4.67488	76597	57202	156913		4.66417	275304	20134	228464		4.5746	13421	13668	70717
4.73122	55157	42891	424119		4.68982	64583	251046	159706		4.67927	129998	19938	964227		4.57868	13576	13799	56511
4.74625	83101	34161	117987		4.7048	53832	98735	201702		4.69415	39975	20180	417764		4.5828	13385	13330	67374
4.76123	141831	52001	69258		4.71978	63830	45840	97232		4.70888	23568	22600	232141		4.58687	13384	13727	100074
4.7762	111692	64193	135910		4.73477	61722	31504	90593		4.72373	28310	21090	85930		4.59095	13751	13621	117434
4.79113	76433	51011	1109481		4.74977	52702	48913	100279		4.73858	28696	26546	184898		4.59505	14231	13212	83495
4.8059	33734	42013	1144406		4.76485	125489	52102	129466		4.74277	30355	30438	325387		4.59917	13860	12579	241856
4.82057	39431	40575	368838		4.78003	237243	34412	122346		4.747	35504	34326	187936		4.60327	14438	12864	69660
4.82483	50413	30227	131410		4.79483	122074	26082	118016		4.76183	40753	43907	100724		4.60738	15024	12629	44426
4.83977	68731	31026	272729		4.80963	40957	71729	104785		4.77682	31906	75220	104403		4.61147	14944	13084	108122
4.85497	61984	31639	487778		4.82435	46943	127493	84500		4.79152	23505	76222	96032		4.62613	14886	12894	739036
4.87015	48187	33283	208654		4.83923	53145	118170	87252		4.80623	22591	54715	190632		4.63025	14456	13281	722992
4.88505	54956	27957	123652		4.85418	35094	39810	274351		4.8104	21804	31692	89985		4.63433	14688	13297	214409
4.89997	45824	25463	125775		4.86907	26456	23871	258010		4.8251	31675	18743	72994		4.63842	13871	14021	77707
4.9151	36837	23843	254912		4.88398	71582	26666	406071		4.83992	42020	17676	110254		4.6425	13379	13065	224604
4.92998	37485	24000	139239		4.8988	191012	33492	186897		4.85472	30974	16487	178673		4.6466	13187	13679	309765
4.94503	31152	23967	164542		4.9138	97058	72144	163620		4.86958	26408	15677	208101		4.65067	13082	13517	112333
4.95992	23771	30614	173698		4.92857	42803	60794	136516		4.8844	58466	14788	68572		4.65473	12867	13123	70814
4.97462	24248	49123	272201		4.94327	24701	40010	202584		4.89923	141284	14296	77313		4.65885	12683	13484	77568
4.98932	32372	58079	413586		4.95787	25550	37546	392360		4.91413	35471	14444	271823		4.66295	13292	13707	120430
5.00405	51095	52386	90492		4.97257	38861	34579	176208		4.92882	21597	14335	153242		4.66703	13583	12673	136636
5.01905	66807	40719	157466		4.98727	90770	48559	172515		4.94355	23999	14160	245720		4.67112	13789	13507	86370
5.0341	57244	60038	513041		5.00215	29400	58720	91755		4.94772	24117	13705	169424		4.67522	14061	13838	59823
5.04912	41773	62358	184531		5.01688	34329	52176	102137		4.96252	22339	15255	391687		4.6793	12786	13346	105928
5.06395	63173	57473	286144		5.03165	38232	33786	224574		4.97737	20479	15297	96119		4.68337	13418	13815	170858
5.0787	69200	39426	345407		5.04645	35749	21827	76722		4.9815	20935	16076	43090		4.68747	12968	14381	105495
5.09363	44882	38877	132356		5.06143	47782	20808	173753		4.98563	20981	16540	38004		4.69155	13212	13393	132519
5.0978	42675	27145	66455		5.0765	57192	16745	364276		5.0004	22164	14968	70783		4.69565	13572	13882	311214
5.11248	28936	25148	71993		5.09143	46526	16617	57377		5.01517	26302	16810	920344		4.69972	13287	13736	122299
5.12718	23897	25624	220134		5.10637	29493	15880	41632		5.02983	41890	16679	5066929		4.7038	12893	12656	128067
5.14187	31941	35132	3596746		5.12123	19103	16706	327932		5.04467	101048	16742	5504818		4.70787	13082	12834	217067
5.15667	93307	110455	8098839		5.12537	18730	15136	1079201		5.05963	206042	16620	6666087		4.71198	12547	13280	72736
5.17167	123267	116371	7602390		5.14007	18168	15042	423262		5.0747	71479	16102	4824056		4.71603	13059	12427	37819
5.18678	77866	76909	5553514		5.15473	15846	14656	202122		5.08948	35144	15524	1310888		4.72012	13839	13364	36784
5.20172	56323	52728	2025536		5.15885	16067	14272	95188		5.1041	25297	15610	352624		4.7242	12860	14282	247087
5.20588	48543	27506	570705		5.16293	14955	14985	237563		5.11873	18435	15105	137377		4.72828	12996	13197	3310831
5.21008	41633	27033	181495		5.16703	15147	15426	333876		5.13337	15942	14983	86880		4.73237	13326	13255	6921064
5.21428	36352	22183	123332		5.1711	15268	16127	140839		5.13748	14879	14794	98873		4.73645	12979	13379	5650877
5.21847	33123	22618	150051		5.1752	15568	16568	104240		5.14158	15110	14182	135925		4.74053	12894	13520	3601658
5.23322	29538	24071	185826		5.17928	16126	16981	117202		5.14568	15177	13937	167685		4.74462	13800	12853	1453727
5.248	27045	35206	191407		5.18342	16864	25700	198864		5.14975	14486	14859	115296		4.74868	13589	12133	255158
5.2628	45249	44638	251691		5.18753	15431	32698	108119		5.15385	15976	15136	105441		4.7528	13815	12944	90529
5.27753	50729	28888	483329		5.19163	16197	21466	114812		5.16848	15005	15098	910233		4.7569	14477	12519	70341
5.2923	33334	22836	2193455		5.19575	16933	16424	112809		5.18313	16984	14748	1571876		4.76102	15372	12444	76472
5.30698	25734	18189	1167613		5.21035	20206	15695	202179		5.18725	16677	14421	736413		4.76508	15202	13108	98393
5.32178	19694	17708	706094		5.2145	21369	16163	313665		5.19132	16977	14750	376058		4.7692	16739	13706	105627
5.33647	18264	18814	201583		5.21862	23657	15762	80102		5.19543	16480	14640	103523		4.77327	20830	12707	77124
5.3511	18025	18301	115243		5.2334	20525	15136	117748		5.19953	17056	14275	94254		4.7774	34025	13565	663669
5.35523	17992	18018	342158		5.24807	17546	16624	453328		5.20363	17258	14855	291873		4.79203	124729	13092	1123055
5.35935	19101	18269	835799		5.2522	17043	15816	160209		5.20772	17765	14748	624873		4.79618	76452	13031	549682
5.374	32089	31717	451100		5.25632	16687	15827	178342		5.21182	19125	14785	355971		4.81075	100175	12691	233925
5.37818	48275	282379	238292		5.2604	16311	15874	345687		5.22645	18839	15188	238789		4.82533	30090	12308	71586
5.3929	140860	357763	98937		5.27505	16781	16077	139222		5.24108	16311	15961	102810		4.83992	19716	12691	70496
5.40803	228526	331563	70974		5.27917	16359	16176	58089		5.25572	14813	15504	54551		4.85455	27931	12974	300352
5.4232	57772	85588	94426		5.28327	15680	15348	55680		5.25982	15030	15734	53599		4.8694	23239	13679	558588
5.438	37373	28857	1651485		5.28737	16190	15919	127983		5.26387	14723	16282	74273		4.88428	21544	13038	230820
5.45263	27467	20739	5956431		5.30202	16492	15538	2499681		5.26797	14818	16438	1661291		4.89905	18764	13604	96805
5.46735	21270	20196	5954297		5.30613	16632	14595	6149705		5.27203	14523	15644	6524045		4.9137	16026	13569	45087
5.47148	19762	18132	4906545		5.31023	16126	15468	7048842		5.27613	14397	15649	4980929		4.91782	15009	14016	46891
5.47562	21055	17536	3369633		5.31433	15863	15982	5253834		5.2802	13950	15545	3989509		4.9324	14057	14462	96578
5.49045	19300	18485	1259719		5.31842	16307	14494	2101518		5.2843	14126	15713	2015732		4.93652	14156	13849	2357938
5.5051	18690	25584	590445		5.33307	15445	15272	605646		5.28835	14365	16548	1273378		4.94057	13822	14883	6704891
5.50923	18370	33086	765012		5.34785	14180	15320	163342		5.29245	14218	19669	412609		4.94465	13727	15461	4317201
5.51335	18513	56928	684885		5.35197	14814	14824	102420		5.29653	13913	45853	588682		4.94873	13456	15937	3264321
5.528	23465	173663	262751		5.35602	14198	13838	101453		5.30063	14426	266886	547551		4.95283	12959	15372	1520990
5.54268	104236	70440	189884		5.36012	13691	13721	143825		5.31522	14185	108071	200692		4.9569	12873	15483	471936
5.54688	74039	57516	327296		5.3642	14258	14079	154534		5.31932	14623	51207	147806		4.96098	13812	15360	360549
5.56173	151360	50729	196158		5.37883	14589	14133	120139		5.32338	13848	20725	245715		4.96503	12859	16396	465085
5.57662	110027	56607	88824		5.38293	14203	14830	538000		5.3275	14812	15905	155114		4.96912	13482	18218	222231
5.59147	63201	39481	64431		5.38702	15078	14058	1373029		5.3421	15629	14408	80910		4.9732	13429	21325	94633
5.60623	62063	26058	63995		5.39112	14907	14009	859183		5.3462	15310	14449	48670		4.9773	13259	26929	132544
5.61038	77048	28612	60249		5.3952	16223	14993	523520		5.35028	14848	14878	43167		4.98138	13443	21207	145043
5.6251	55043	29398	64020		5.39932	16769	14722	150360		5.35437	15876	14770	46328		4.98545	12791	16728	73174
5.64005	30114	34620	84789		5.40342	19840	14700	101745		5.36898	15212	15086	49285		4.98953	13217	16144	35533
5.6442	26870	36257	181050		5.40753	28367	14869	367192		5.3836	14793	14740	40872		4.99362	13123	15287	30424
5.64835	28567	31183	1038289		5.42228	76530	15091	774936		5.38772	15657	15098	50723		4.9977	13711	15421	34052
5.65248	30033	22720	1663427		5.43715	56523	16428	382427		5.4023	14955	14655	311651		5.00178	13817	14489	30735
5.65663	34179	21039	832009		5.45192	35937	17728	178904		5.4064	15167	15163	919416		5.00585	14427	13878	37300
5.67142	40949	20514	487846		5.46682	25311	23336	72557		5.41047	14658	15723	943552		5.00997	14345	13949	48804
5.67557	42170	19452	179001		5.48163	21997	60588	56330		5.41453	13559	14874	857430		5.01403	14076	13830	310565
5.67972	43182	20551	123378		5.48578	19224	72170	81093		5.4186	14408	15625	283375		5.01812	14317	14403	784255
5.69452	30437	18788	261809		5.48988	18216	61045	1872717		5.42268	14387	22327	83340		5.0222	14587	13347	634093
5.69863	27229	20310	527886		5.49397	17359	42037	6572872		5.42675	15808	28935	80216		5.0263	14983	13007	451387
5.70277	26028	24655	156567		5.4981	16158	26492	5378881		5.43088	17742	30283	364206		5.03038	13830	13593	148867
5.7069	23916	165009	74059		5.50222	16128	17088	4754320		5.44553	53164	27969	360541		5.04502	15298	12811	60912
5.71103	22504	305995	50218		5.50632	15194	15890	2863902		5.46032	78920	21489	183359		5.04913	15204	12251	135511
5.71517	22043	263735	66406		5.51043	14838	15488	881963		5.47525	37262	16941	80930		5.0532	16213	13769	311319
5.7299	19419	87778	71099		5.5145	15836	14569	461674		5.49017	18951	14791	67586		5.05732	14826	13502	100665
5.73402	19934	36497	65311		5.5186	14843	15189	763127		5.5048	16400	14273	67423		5.0719	15194	13339	58792
5.74867	16948	33684	38739		5.5227	15773	14568	456722		5.51945	14736	14712	42915		5.07598	14789	12882	39370
5.7633	22191	40345	36966		5.52682	15995	14117	173327		5.52355	14504	13795	29964		5.08007	14865	12753	32259
5.76743	25269	81881	58156		5.53088	15540	15299	159430		5.52763	15004	13802	27363		5.08415	15020	13243	33364
5.77158	38247	92300	98063		5.53502	15233	15345	211555		5.53173	15520	13655	39137		5.08822	14823	12752	31029
5.7864	114614	55547	303083		5.53915	15871	15232	121829		5.54635	15074	13601	41822		5.09232	13887	12905	22685
5.80142	118739	30443	343883		5.54325	14904	14984	64606		5.55045	15233	13484	77369		5.0964	14899	12578	24458
5.81663	55684	20016	927420		5.54735	15159	15114	47261		5.56507	15840	13753	249305		5.11103	13163	13212	26669
5.8317	34060	19050	1478521		5.55147	15615	15387	42939		5.56917	16450	13740	289303		5.11513	13099	12118	39157
5.84653	28684	16866	2963081		5.55555	14958	14875	48385		5.58375	15208	15247	801556		5.11922	13832	12918	76102
5.86123	37096	17209	1559186		5.55967	14842	15559	55770		5.58785	16701	15107	1392510		5.12328	13448	13088	279443
5.86538	54385	17233	897274		5.56373	15230	15712	74806		5.59193	16988	14634	2981479		5.12737	13596	12789	256638
5.88022	126006	18557	270308		5.56785	15128	15404	460609		5.60658	26642	15730	1087100		5.13148	12732	13054	1125273
5.89518	112232	17467	73358		5.57193	15448	16057	1137723		5.62122	27873	19060	603469		5.13555	13275	13134	864990
5.91018	60131	17406	70799		5.57605	15124	16075	797097		5.63583	20533	19456	197835		5.13963	13656	13164	1776737
5.92503	34080	19153	73017		5.5801	15152	16479	572709		5.65047	17139	15537	56969		5.1437	13319	13652	779247
5.93992	20699	17854	90449		5.58422	15570	15522	194650		5.65457	16337	15320	52712		5.1478	13279	12587	253480
5.94407	19378	22146	62033		5.5883	16191	15391	94663		5.65863	14714	16611	60228		5.15187	13509	13314	66059
5.94822	18788	22682	53271		5.60295	16606	14188	212966		5.66273	15411	18192	50014		5.15598	13145	13616	25202
5.96287	17715	27167	66129		5.6177	16460	14286	459827		5.6668	14230	21827	44304		5.16005	13225	12877	31773
5.967	16875	28971	171515		5.63235	14780	15313	121978		5.67088	14323	102559	41995		5.16415	13171	13506	39300
5.97112	19609	24570	109187		5.63645	15077	14145	67492		5.67493	13799	192504	36229		5.16822	13273	13829	32022
5.98585	18749	18698	162525		5.64053	15533	14120	44155		5.67902	13680	45072	32902		5.1723	13664	13640	27932
6.0005	17402	17785	161101		5.64465	15602	14124	55191		5.68308	13890	25070	31092		5.17635	12189	13209	29198
6.01515	18836	17877	193750		5.65927	14481	14069	58579		5.68717	13904	18862	25868		5.18045	12904	13025	25712
6.0193	18748	17535	276469		5.66338	14328	14101	41862		5.69123	13959	20193	23611		5.18453	12614	13616	20615
6.02342	18907	15267	184776		5.66743	14611	13715	30599		5.69533	13382	22504	25914		5.18862	13214	12893	21412
6.0382	19559	16195	233990		5.67155	14595	13788	43599		5.69938	13717	21244	28945		5.19267	13241	13174	19499
6.05285	24485	16782	233930		5.67562	14605	13993	66718		5.70347	13311	20360	32515		5.19677	12619	13315	18247
6.057	26346	17281	151532		5.6797	14721	14262	195257		5.70753	13495	18471	46095		5.20082	13416	13637	20254
6.07168	35186	16891	115859		5.68378	14393	14682	278905		5.71162	13356	15924	45966		5.20493	13092	13227	18809
6.08677	25526	15870	76636		5.68785	14369	14267	858085		5.71568	13954	14721	37411		5.20898	12796	13560	22420
6.10162	18031	15230	57628		5.69193	13911	14387	1237851		5.71977	14476	13769	36286		5.21307	12950	13668	25343
6.10575	17713	15384	89890		5.69605	14589	14422	2499731		5.72383	14732	13849	34911		5.21715	13298	13400	28440
6.10988	18675	13950	188132		5.7001	14131	14375	830539		5.72792	14048	14080	37021		5.22122	12658	13445	32630
6.12452	16897	14948	120627		5.7042	14809	14566	479842		5.73198	14148	14674	42905		5.22528	12906	13051	29463
6.12865	16599	15138	159032		5.70828	14836	14905	147876		5.73607	14189	14180	86809		5.22937	13093	13783	28494
6.13275	15945	14884	114538		5.71237	14797	14917	45821		5.75067	14308	13499	182015		5.2334	12951	13771	27705
6.13682	16092	14889	73379		5.71643	14837	16351	43589		5.75475	14830	13683	105637		5.23752	13021	13096	26267
6.14097	16190	14836	56620		5.73105	14558	15869	52805		5.76938	15759	13910	102022		5.24157	13457	12957	33659
6.14508	16406	14735	38254		5.7457	15358	17212	49206		5.77348	16255	14638	70015		5.24567	15779	13443	41980
6.14915	17637	15301	34424		5.74982	14497	18221	41993		5.77755	17937	14265	43275		5.24975	29943	13509	99063
6.1639	18515	13986	37215		5.7539	14586	16846	41259		5.7923	15574	15203	43649		5.26445	255613	12776	126531
6.17857	17377	14747	36021		5.75817	15126	17028	64124		5.7964	15533	14728	40152		5.27945	174743	13085	91702
6.18268	16008	14202	29482		5.76228	16016	16700	103422		5.80048	15594	14343	38784		5.29433	108016	13510	61148
6.1973	15910	15197	26392		5.76637	16095	18891	104640		5.80458	16842	14001	35665		5.30912	31398	13101	38603
6.2014	15097	14887	22765		5.77047	17039	27873	94622		5.81918	20625	14875	30759		5.32387	15948	12862	34005
6.20547	15039	15192	20871		5.78508	16633	36274	160852		5.83387	36588	14896	29122		5.33848	13966	13229	32016
6.20958	14959	14872	19283		5.7892	15597	31772	113946		5.84868	48964	14566	25618		5.34257	14175	12594	23029
6.21365	15248	15585	19566		5.79328	16457	22458	142545		5.86368	40597	12802	22485		5.34665	14448	13474	21458
6.2283	14388	15628	18798		5.7974	16029	18479	117538		5.87855	25116	14061	20905		5.35075	13994	13146	20265
6.2324	14218	15600	19683		5.8015	16244	21849	76562		5.8932	21714	14218	20260		5.35482	14291	13428	21556
6.23647	14870	15267	19451		5.80562	17001	23489	56923		5.90788	25632	13890	18937		5.35893	13523	12786	20442
6.24058	14433	16151	21325		5.8097	17828	22309	42499		5.92253	27112	13606	19704		5.363	13754	12527	20270
6.24467	14730	16271	20466		5.82445	20855	22276	39537		5.93728	23294	13613	18294		5.3671	14190	13675	19582
6.24877	15004	15718	21818		5.83908	26840	21229	64749		5.95208	24149	14636	18306		5.37117	14325	13517	20012
6.26338	14919	15637	21549		5.85387	27372	20178	150283		5.96672	17852	17248	17412		5.37527	14019	13463	19751
6.26748	16420	14665	20542		5.86867	21212	16109	106617		5.98147	15139	17528	18836		5.37933	13874	13707	18996
6.27155	15376	15825	21197		5.88333	20708	14783	129225		5.98558	15049	19899	19118		5.38342	13584	13062	18830
6.27565	15660	16077	20134		5.89802	22961	15670	86463		5.98963	14464	18377	18312		5.39803	13756	13472	19146
6.27973	15579	17836	19528		5.91268	22971	15137	49810		5.99375	14054	14620	17891		5.40213	13605	12794	17512
6.28383	14792	20496	19556		5.92745	23235	15215	32759		5.99783	13559	13898	18380		5.40622	13952	12590	16211
6.28792	14583	22446	20058		5.94227	20564	16294	26225		6.00193	14352	14412	17697		5.4103	13916	13210	15811
6.29202	16081	32566	20419		5.9464	20366	14193	26143		6.00598	14039	13866	18458		5.41437	13160	13426	16163
6.2961	14640	27421	21378		5.9505	19178	14449	26623		6.01008	13297	14325	19580		5.41847	13432	13569	15750
6.3002	15467	19192	26255		5.96512	16623	14654	27777		6.01413	14206	13172	21053		5.42253	13621	13532	15909
6.3043	14886	18339	29657		5.97977	15806	14745	29302		6.02877	15927	13584	24615		5.42662	13452	13324	15186
6.3084	15794	17023	24149		5.9839	15669	14294	25494		6.03285	15260	13688	26281		5.4307	13218	13030	16031
6.323	15348	16978	23316		5.988	14873	14612	24214		6.03692	15086	14036	22238		5.4348	14008	13089	14760
6.3271	14932	17183	28816		5.99205	15400	13903	20737		6.05163	15080	13955	23108		5.43888	13649	13197	15295
6.33117	15109	18923	83154		5.99617	15217	14422	21297		6.05573	15114	13784	25975		5.44297	13415	13388	14769
6.33528	15845	18785	225745		6.00025	15812	14386	20393		6.07035	14568	13620	51345		5.44703	14176	14499	14758
6.33935	15261	21262	104616		6.01492	15895	14348	20207		6.07443	14622	14318	153076		5.45113	15052	16936	16618
6.34345	16341	23791	820002		6.01902	15754	13927	17802		6.0785	13052	14470	130560		5.4552	16620	24214	15198
6.35807	17775	53241	2349320		6.03362	15171	14148	17903		6.08258	13991	14425	1124960		5.46987	17967	43425	15756
6.3727	19681	164051	5853031		6.04823	14927	14418	17002		6.08665	14710	13925	2419970		5.48468	15990	31857	16194
6.38732	18287	102105	4934484		6.05235	14502	14762	17529		6.09075	14019	13659	6040503		5.49942	13466	17884	15408
6.40197	16930	136479	5060864		6.05645	14842	15306	17559		6.0948	14923	14318	4449165		5.50352	13287	12883	15917
6.40607	17135	151023	3400418		6.06055	14646	15965	16613		6.10955	16621	13764	4199881		5.5076	13824	13147	15360
6.41017	17994	213108	1660956		6.06463	14099	16630	17515		6.11363	17412	13578	2540490		5.51168	13270	13360	15089
6.42485	19512	256939	787160		6.06873	13965	17552	18608		6.11773	20794	14183	1161172		5.51573	14097	13373	15190
6.43952	18857	248895	309041		6.0728	13899	16390	18331		6.13252	18798	13986	451796		5.51983	12941	12970	16000
6.44363	18773	201366	112031		6.0769	14395	16623	18804		6.14718	15638	14068	207230		5.52388	12407	13050	15275
6.44773	20947	166553	79766		6.08097	14949	15921	19134		6.15127	14453	14166	85871		5.52797	12780	13119	15257
6.46238	23182	100542	67978		6.08507	14543	14906	18864		6.15535	13902	13637	56383		5.53202	12938	13144	15556
6.47705	43114	67242	55201		6.08913	16590	13967	19011		6.15943	14150	14361	76182		5.5361	13642	13620	16954
6.49193	161112	35724	50796		6.09323	16366	14675	19517		6.1635	13873	13428	54743		5.54018	13593	13622	19360
6.5068	104702	25158	48615		6.09732	20876	14041	17983		6.16758	14308	13764	40713		5.54428	14317	13761	16975
6.52163	161777	22886	56392		6.11213	21206	13223	17948		6.17167	13806	14197	39599		5.54833	14506	13593	17106
6.53647	150234	22208	57051		6.12677	15956	14402	18021		6.17575	13924	13692	41770		5.55245	14490	13410	17603
6.55127	198460	21521	42356		6.13085	16359	13710	17067		6.17982	14078	13436	53312		5.55652	14064	12382	16282
6.56603	289020	19891	30916		6.13493	15700	13715	18113		6.1839	13876	14684	51514		5.56062	14543	13490	18242
6.58085	187281	19458	26127		6.13907	15140	13954	18089		6.18797	14087	13687	37888		5.56468	14916	12829	20330
6.59565	212882	19275	25995		6.14315	14153	13482	17875		6.19208	13143	14273	27834		5.56878	14194	13581	43672
6.61043	195723	19589	27739		6.14722	14312	14299	18580		6.19615	13814	13886	24707		5.57287	15180	13251	90030
6.6252	132829	19691	29850		6.15128	14009	13823	19158		6.20023	14068	13767	23952		5.57697	13605	13155	129714
6.64005	93684	19021	31649		6.15535	13955	14370	20228		6.20428	14197	13770	25783		5.58102	14470	13870	317449
6.65483	53931	19259	49717		6.15945	13078	14459	21398		6.20838	13950	13662	29314		5.58512	14818	13343	2178399
6.66977	33174	18511	67417		6.16353	13700	14327	21278		6.21245	14274	14002	30213		5.58917	16590	13514	3144438
6.68445	23862	17811	69272		6.16762	13837	13526	24346		6.21652	13537	14071	54285		5.6038	17492	12911	4524419
6.68857	22942	17434	34180		6.17168	13834	14245	21805		6.22058	14112	13387	82282		5.61843	15051	13540	2703177
6.70323	20543	17611	31850		6.1758	14342	13943	20027		6.22467	13413	13701	90764		5.62255	15121	13240	2330122
6.71787	20988	17503	31251		6.17987	14079	15129	21407		6.22875	13137	13660	56082		5.62662	14362	14063	1259059
6.722	19689	17771	38934		6.18395	14547	14690	24320		6.23283	13562	13752	33759		5.6307	14259	14251	558816
6.72612	19469	18689	200575		6.18803	14140	13877	51266		6.2369	14009	13843	32490		5.63478	14181	14486	209616
6.74082	18202	18595	266225		6.19213	13691	13963	139126		6.24098	14098	13934	51056		5.6389	13216	13984	101642
6.74495	18709	18363	418147		6.1962	14325	14507	98077		6.24505	14103	13861	197235		5.64295	14099	14517	48237
6.75957	17151	17716	190344		6.2003	13684	14567	351723		6.24913	14000	13538	257366		5.64705	13457	16280	68831
6.76367	17657	18584	101972		6.20438	14177	13556	1884223		6.25322	13837	14028	358996		5.65112	13264	14377	51709
6.77828	18192	17020	43727		6.20848	14246	14712	2633517		6.25732	13502	13509	132891		5.65522	14532	14227	36600
6.79305	17650	16303	34586		6.21257	14211	14344	5332022		6.26138	14299	14697	69307		5.65928	14817	14246	27591
6.79715	18993	16149	35775		6.21667	13986	14786	4187161		6.26547	14218	14372	45029		5.66337	17806	13441	23850
6.80123	18235	16204	49053		6.23128	13410	15140	2953652		6.26953	13924	14663	38354		5.67795	98707	13578	30238
6.80535	18083	15623	55984		6.23538	13755	14253	1475719		6.27362	13974	19540	40575		5.69285	225016	13205	33980
6.80943	20225	16541	45775		6.23947	13680	14670	639585		6.2777	14218	20022	37674		5.70797	57948	13379	30261
6.82408	20174	16200	33605		6.24357	13594	15013	265941		6.28178	14060	16644	28952		5.7228	29275	13513	24034
6.83872	18751	14519	27644		6.24765	14193	15067	82984		6.29637	13889	15720	21225		5.7376	18872	12668	19596
6.85337	16831	14409	26418		6.26228	14971	14148	61140		6.30047	14714	15887	19224		5.75223	17155	12731	19097
6.85748	17929	14318	21659		6.26637	14836	14465	71592		6.30455	14186	15707	18232		5.76688	19389	12794	18320
6.86157	17304	15317	19746		6.28098	14310	14120	59449		6.31917	14540	15207	18682		5.7817	18930	13716	16850
6.87632	15899	15136	18929		6.2851	14738	14100	45727		6.32325	14280	16243	18475		5.79647	19001	13414	17455
6.89097	15766	14617	18204		6.28918	14696	14404	36541		6.33788	13938	14764	18705		5.8111	18615	13172	17557
6.89508	14940	14434	19078		6.30385	13799	13650	40560		6.34197	14290	14953	18337		5.82585	16985	13104	18383
6.89915	14994	15343	19453		6.30795	14297	14096	38406		6.34603	14216	15489	18556		5.84047	14542	12659	20200
6.91377	15437	15122	20120		6.31202	14129	14155	30520		6.35012	13960	17295	18436		5.84458	13805	13193	21999
6.91788	14411	15003	21911		6.31612	14673	14603	28006		6.35418	13761	22787	18262		5.84865	13934	13264	25040
6.92193	14847	14562	26217		6.3202	14318	14573	23882		6.35827	13548	29326	19081		5.85275	14268	13747	32469
6.92603	15403	13029	26281		6.3348	15144	15184	27424		6.36235	13326	29959	18254		5.85682	14057	13694	28484
6.9301	14373	13600	31704		6.33892	14490	14786	27907		6.36643	13462	27826	19211		5.86092	13368	14101	28714
6.9342	15098	13695	39247		6.34298	14868	14549	28962		6.3705	12845	21353	19463		5.86498	13377	13916	22550
6.93827	14907	13727	53882		6.34708	13909	14790	31341		6.37458	13068	16333	19354		5.86908	13538	13324	19150
6.94237	14834	13525	52516		6.35115	14895	14893	42807		6.37867	13880	14872	18270		5.87315	13484	13625	19416
6.94643	14692	14088	34430		6.35525	14732	15191	49146		6.38275	13048	14876	18849		5.87725	14014	14566	19781
6.95053	15018	14007	25835		6.3593	13493	14845	36277		6.38682	13449	15139	20281		5.89187	13249	14386	19715
6.95462	14519	14771	21638		6.36338	14516	14833	38193		6.3909	14207	14416	22706		5.89597	13022	13960	21034
6.95872	14253	13906	21114		6.36747	14743	15217	75661		6.4055	14805	15020	28115		5.90002	13466	14769	26027
6.96278	14750	14273	20564		6.37157	15152	15876	229705		6.42017	16424	14144	38565		5.9041	12496	15406	74353
6.96688	13943	13729	21197		6.37562	14793	16879	211998		6.42427	16547	13984	47984		5.90818	13136	16254	194789
6.97097	14319	13945	21463		6.3797	15157	15550	281014		6.43888	16066	14512	40269		5.91228	13437	15023	126147
6.97508	14154	14198	27869		6.38377	15150	15362	169462		6.45363	15368	14059	26611		5.91633	12676	14974	142783
6.97915	13971	13720	31564		6.38787	15085	14537	66127		6.45773	15484	13934	20697		5.9204	13271	13729	72888
6.98323	14492	14298	33459		6.40248	15668	15406	34580		6.46182	15343	14371	20189		5.92445	13112	14251	39931
6.98732	14101	13890	36660		6.41715	15118	15666	28669		6.46592	15934	13954	21184		5.92853	13377	13200	23801
6.99143	13955	14381	64025		6.42125	15610	15484	28717		6.48052	17168	13983	21951		5.9326	12604	13327	26288
6.9955	14220	14514	95819		6.42532	15654	15719	26530		6.48463	17119	14470	25970		5.93668	13343	14745	35436
6.99957	13486	13802	55643		6.42942	15340	16169	22433		6.48875	17294	14579	32412		5.94073	13285	18635	31270
7.00365	14369	14566	39012		6.44402	16154	17656	19612		6.50338	22243	14987	27790		5.94482	12559	23233	24040
7.00773	14410	14353	55426		6.44815	15923	18484	16641		6.51803	26122	14886	35784		5.94888	13237	25669	17338
7.0118	14052	15343	196743		6.46277	17100	21074	16977		6.53285	28312	15715	59466		5.95298	12741	19301	15063
7.0159	14342	14630	207721		6.46688	16085	24064	17072		6.54763	27348	15392	66055		5.95703	13590	14322	15854
7.01997	14292	15326	301032		6.47095	17394	53159	17182		6.5624	20000	15627	41407		5.96113	14090	14488	15252
7.02405	13286	14966	136451		6.4856	18684	101717	16609		6.57705	16531	15550	36274		5.96518	13366	13700	14260
7.02812	14161	14570	131927		6.50027	22124	79878	16462		6.5917	14402	15568	76079		5.96928	13047	13672	15185
7.03222	13846	14921	94425		6.51505	30532	95626	15667		6.59578	13946	16135	128767		5.97335	13453	13971	13807
7.03628	14155	14456	77800		6.52973	73975	143722	15971		6.59985	14325	15926	43484		5.97745	14887	14605	15165
7.0404	15048	14844	134301		6.5446	106284	103964	16789		6.60395	14483	16673	34213		5.99205	17903	14001	13972
7.04447	13842	14586	246075		6.55943	70281	116848	16490		6.608	13647	17593	26123		5.99615	20236	13785	14824
7.04858	14895	14958	130866		6.57428	102853	84762	16510		6.6121	14533	18299	23872		6.0108	19500	13669	14336
7.05265	14468	15569	164285		6.58918	164701	53886	16132		6.61618	14072	19140	35154		6.0257	14638	13300	14280
7.05677	15641	17226	130068		6.604	96492	33039	16085		6.62027	14038	17809	44234		6.0298	14847	13103	15145
7.06085	15833	18117	67681		6.61878	108684	23534	16623		6.62433	13890	16540	85845		6.03387	13678	12806	14320
7.06495	14615	21744	40111		6.63357	67412	19968	17618		6.62843	15061	16432	155226		6.03797	13425	13498	15243
7.06903	15664	20959	32160		6.64835	53847	16782	16970		6.63248	15615	16780	167766		6.04202	13133	13530	14372
7.07315	14624	22351	25872		6.66318	36800	16295	17668		6.63657	15063	15780	90756		6.04612	13253	13138	14598
7.07723	15901	27420	24147		6.67803	25242	16447	16763		6.64063	15743	16298	56066		6.05018	13671	13564	14836
7.09188	16299	72031	23253		6.6928	20635	16245	17574		6.65528	16809	15698	39456		6.05428	12719	13436	15265
7.09598	16494	151930	22528		6.70755	17938	15848	17180		6.6594	16146	16209	26881		6.05833	13526	14527	15480
7.10005	18259	73317	20029		6.71167	18457	16298	17830		6.66348	16689	15844	19909		6.06242	12698	13723	14573
7.1148	24306	51834	19486		6.71575	17441	16436	18550		6.67812	18289	16088	19220		6.06648	13236	13141	15391
7.12957	30096	33110	18621		6.73038	17554	16285	18777		6.69275	19593	16035	19005		6.07055	13454	13793	14558
7.14433	27603	20643	19953		6.7345	17785	14755	19535		6.69685	21264	15574	18724		6.07462	14110	13336	14840
7.15913	20790	16952	19019		6.74908	16392	14888	23411		6.71147	22216	15756	17692		6.07872	13530	12897	15114
7.17382	26456	16494	19675		6.76373	15707	15297	26599		6.72627	18987	15138	17602		6.0828	13548	13299	15387
7.18858	31307	16765	20458		6.76783	15728	14644	29236		6.73038	18669	15602	18792		6.0869	13569	13733	15189
7.20332	31231	16036	23819		6.77192	14259	14217	31996		6.745	18148	16393	18279		6.09098	13055	13840	16581
7.21825	22769	14900	20785		6.77602	14425	14131	27881		6.7598	17363	17827	19684		6.09507	13213	12995	18528
7.2329	20706	15889	20058		6.78007	14603	14901	22710		6.76392	16227	17854	20114		6.09913	14288	13403	22363
7.24753	18058	15808	19672		6.78418	14665	15016	18607		6.76798	17331	16515	19512		6.10323	14220	13446	24894
7.26217	16973	14974	19828		6.78823	14138	15317	17922		6.7721	16718	15956	18358		6.11785	13155	13361	26148
7.26628	17156	15021	21351		6.79235	14662	15293	18977		6.77617	16693	15606	18495		6.12197	13096	13308	22439
7.27037	17244	14466	23363		6.80695	14350	14519	19017		6.79082	16198	15869	17450		6.12603	13036	13363	19171
7.28512	15622	14792	26086		6.81105	14505	15005	20980		6.7949	15941	16420	17100		6.13013	13680	13161	16800
7.28923	15918	15021	23917		6.82567	14470	14866	23035		6.79897	15929	16701	18639		6.13418	13492	13242	16543
7.29328	15760	14596	20068		6.84027	15266	14500	26345		6.8136	17629	16265	19404		6.13827	12866	12929	16335
7.2974	15727	15785	20926		6.84438	15216	15346	28826		6.81772	17711	15473	22690		6.14232	13221	13087	15210
7.31198	14850	16062	18762		6.84847	15991	15324	53128		6.82178	18247	15565	22644		6.14642	12838	12889	16286
7.3161	14862	15842	17710		6.86308	16149	15136	78327		6.83653	17998	14917	19829		6.15048	13441	13540	15614
7.32017	14746	16631	17270		6.8672	16377	15040	54256		6.85127	17069	14850	19491		6.15458	12781	13149	16413
7.32427	15256	16120	17201		6.87125	16484	15843	31699		6.85537	16261	14487	19130		6.15867	12559	12991	15867
7.32835	14813	16414	17702		6.88592	15349	16698	29095		6.85943	16115	14604	18364		6.16277	12969	12739	16807
7.33245	14445	15552	17271		6.90057	15268	15782	49609		6.87407	15519	13590	17454		6.16682	12734	13066	16940
7.3365	14448	16298	17486		6.90468	14683	15071	72274		6.87818	16512	13597	17566		6.17092	12620	13004	19449
7.3406	15253	16534	17325		6.90877	15202	14954	63492		6.88225	16638	13578	17458		6.17498	13348	12993	19334
7.34468	15498	17254	18086		6.9234	13764	14898	45429		6.89698	15935	14393	17390		6.17908	13125	13452	19611
7.3488	15690	18034	15930		6.9275	13802	14207	29238		6.90107	16343	13889	16614		6.18313	13139	12274	19485
7.35287	16139	17935	16918		6.93158	14161	14214	26772		6.90513	16980	14317	16924		6.18722	13745	12791	19205
7.35698	15178	18337	16014		6.93567	14164	14783	28456		6.90923	16269	14448	17024		6.19128	13219	12539	20494
7.36103	15406	16969	16548		6.93973	13984	14038	39060		6.9133	16531	13358	16334		6.19535	13638	12750	23776
7.36515	15864	17010	16314		6.94383	13558	14231	66702		6.92793	15050	15258	16895		6.1994	12671	13207	32914
7.36922	16132	17069	16473		6.95842	15200	14365	112787		6.93202	15085	14653	16496		6.20348	13289	12924	39941
7.37332	16998	16107	16352		6.97303	14417	13774	123308		6.93608	14364	14922	15983		6.20755	13977	12842	30135
7.3774	16157	15322	16090		6.97715	13602	15109	92390		6.94017	14069	14066	16484		6.21165	13948	13081	22589
7.3815	16177	15760	15335		6.98122	13966	13936	54123		6.94425	13753	13891	17048		6.2157	13753	13523	24986
7.38558	16355	14845	16348		6.9853	13496	14024	33069		6.94833	13466	14080	17081		6.23032	13849	13245	40751
7.40022	16533	15294	15190		6.98938	13296	13580	22207		6.9524	14293	12934	16101		6.23442	13541	14235	49497
7.40433	16576	14411	15645		6.99347	13616	13586	20831		6.95648	14033	13631	16355		6.2385	13999	13009	35733
7.4084	16300	14609	16155		6.99753	13009	13146	20661		6.96057	14521	13660	16271		6.2426	13374	13188	22578
7.41252	16593	13925	16982		7.00165	13201	13496	17497		6.96467	13804	13701	16013		6.24668	12949	13823	19318
7.4166	18361	15230	16708		7.00572	13334	13543	18455		6.96877	14113	14097	15623		6.25078	12891	15683	18990
7.43123	20289	14353	18672		7.00982	12860	13708	16872		6.97287	14580	13477	15907		6.25485	13334	17333	20301
7.4459	21191	14967	19299		7.01388	13770	13850	18576		6.98747	14878	12840	15864		6.25893	13732	17476	24489
7.46067	18981	15625	22628		7.01798	13549	14195	18215		6.99157	14468	13577	15563		6.26302	13214	14545	26395
7.47528	16380	17456	26141		7.02203	14114	14189	17176		6.99562	14831	13519	14951		6.26712	13812	14143	38848
7.4794	15741	18821	32403		7.02613	14146	14212	17702		7.01025	13825	13398	16076		6.28175	13814	13367	45266
7.48348	16439	25050	42854		7.03022	14269	14225	18817		7.01433	13663	14324	15480		6.28585	15062	12687	51327
7.48758	15108	26668	87082		7.03432	13581	14361	18896		7.01842	13082	13908	15685		6.28993	15184	12978	37157
7.49168	14845	21860	103338		7.03838	13260	14283	19537		7.0225	14091	13916	16334		6.30465	17372	13169	22301
7.49577	15136	19027	64602		7.04248	14230	14124	19251		7.02655	13900	14187	17256		6.3193	20806	13417	22367
7.49985	15129	15761	42572		7.04657	13374	13316	17864		7.03065	13008	14223	16502		6.33397	22517	13280	18310
7.50397	15137	15666	30562		7.05065	13686	12871	17970		7.03472	13798	14179	21911		6.3488	16093	12783	16222
7.50805	15338	15362	28658		7.05472	13829	14355	18791		7.03882	12941	15128	26828		6.3529	15528	12935	16432
7.51215	16129	14548	24537		7.0588	13991	13284	19221		7.04288	13089	17012	51287		6.35698	14269	12652	17037
7.51623	17681	15411	23798		7.06288	13817	14179	22507		7.04698	13657	16903	68266		6.36107	13957	13019	15434
7.53087	28389	14302	23189		7.06697	13166	13256	22118		7.05105	13648	16268	59063		6.36513	14455	13414	14733
7.54552	46031	14705	21952		7.07102	13325	14282	19703		7.05515	13440	15039	36423		6.36923	14006	13556	15388
7.56018	46087	15611	22967		7.07512	14372	15030	17119		7.05923	13190	15298	27466		6.38387	14244	13071	15129
7.57502	34170	17896	25375		7.07918	14273	13965	17171		7.06332	14321	14371	26264		6.38795	14330	13278	14818
7.58968	22638	21237	25947		7.08327	14120	13815	17136		7.06738	13903	13821	22520		6.39202	13455	13052	14535
7.60432	17109	31467	24211		7.08733	13945	14313	16000		7.07148	14010	14658	20823		6.3961	14911	13371	14548
7.60842	15349	34475	21874		7.10202	13878	14533	15999		7.07557	14581	14314	20398		6.41072	15357	13539	15360
7.61247	15809	32842	24212		7.1061	14222	14097	16670		7.07965	14495	15256	21027		6.41483	15189	13165	13686
7.61658	15818	25863	27184		7.11017	13694	13242	16236		7.08372	14778	16848	21532		6.4189	16201	13828	14966
7.62065	15871	21188	32926		7.11425	14632	14948	16221		7.09837	16146	19833	27866		6.42298	16360	12856	14201
7.62477	14998	18643	35893		7.11833	14452	13889	16755		7.10247	16696	22689	27768		6.42705	16879	12957	14391
7.62887	16630	17148	29732		7.1224	15568	14329	16552		7.10653	18314	22822	29006		6.44168	16947	12864	15189
7.63298	17459	16783	25952		7.13703	15676	14256	16667		7.12127	17156	37458	23533		6.45635	15838	13207	14526
7.63707	16786	16744	21782		7.14115	16219	14013	15455		7.13592	15170	57226	21351		6.46045	15249	12939	15107
7.64117	18575	16364	20179		7.14523	16542	14122	15950		7.14002	15881	51368	21230		6.4645	14558	13894	14491
7.64527	20990	17026	21149		7.15988	16518	14533	16351		7.14408	16029	33886	20112		6.46858	14802	12351	13820
7.66012	27330	15875	21219		7.16398	15424	14838	16819		7.15872	15678	29718	21806		6.47267	14270	13256	15322
7.6749	32957	16005	20341		7.16807	15847	15001	16729		7.16282	19129	30125	19658		6.47675	14136	13369	15290
7.68978	29859	15418	20655		7.17217	15586	15978	15535		7.1774	23814	31057	20206		6.48082	13997	13639	15322
7.70463	23206	15913	21359		7.17623	15404	16366	15807		7.1922	21524	25864	18700		6.48493	13987	14010	16238
7.71932	20866	15794	21179		7.18035	14195	19051	15276		7.20693	19366	19693	18411		6.489	13704	12644	16593
7.73397	20704	15599	21016		7.1844	14149	18653	16212		7.22168	17338	16099	18499		6.4931	13685	12879	16340
7.74862	20030	14860	19696		7.1885	14120	15031	15628		7.2258	17892	17124	17517		6.4972	13736	12982	16091
7.76337	17621	16887	19454		7.19258	14414	15506	15864		7.2404	22365	15809	17390		6.50128	13170	12742	14866
7.7781	16636	16007	20345		7.19668	14634	14837	15911		7.25522	19375	14971	17798		6.50537	13460	12983	14681
7.78222	16267	16781	22278		7.20077	14612	14696	16575		7.25932	21065	15125	16644		6.50947	13934	13400	15179
7.78628	16063	16336	23513		7.20487	14223	15581	15780		7.2634	25402	14540	16977		6.51353	13954	13747	14962
7.7904	17282	16495	25699		7.20893	14725	17038	16327		7.27817	34399	14489	17252		6.5176	13817	12904	14846
7.79448	17187	16132	36808		7.21303	14290	18427	15540		7.29295	41115	14358	17168		6.52168	13642	13685	15671
7.80913	17190	17050	69638		7.21712	14111	18525	16327		7.30772	38153	14231	16928		6.52578	14236	14194	16088
7.8238	17482	18214	98833		7.2212	14413	19353	16445		7.32265	30988	14652	16768		6.52985	13549	13188	16339
7.8279	17524	18759	90107		7.22527	15027	17661	17016		7.33742	22847	14094	16690		6.53397	13713	13645	16728
7.832	16790	19658	90425		7.22937	14689	17316	17696		7.3522	16992	15315	17271		6.53803	13818	13431	16932
7.83613	18335	17337	114072		7.23343	15118	16535	18366		7.35632	16888	15106	16586		6.54213	13403	13052	16598
7.84023	18847	16208	96385		7.23752	15683	17183	20086		7.36043	16010	15802	16999		6.54618	14313	13783	16147
7.85492	18519	16085	67180		7.2416	17024	16579	21235		7.36453	16435	15048	16053		6.5503	12924	13294	15742
7.86963	18091	14982	37831		7.24573	18516	15994	24278		7.37915	14749	16079	18297		6.55435	13258	13381	15475
7.87375	16957	15031	27441		7.26038	19639	16631	28175		7.38325	14760	15427	18540		6.55845	13374	14187	15244
7.88835	15972	15487	24896		7.27517	17368	15524	34154		7.38733	14591	15628	18123		6.56252	13133	13095	15792
7.903	15936	14627	25786		7.27927	17261	14335	53773		7.39143	15319	15359	19789		6.56663	13501	13097	15158
7.9071	14520	14561	26867		7.28338	16643	14914	57577		7.3955	15283	16548	19435		6.5707	13459	12494	14566
7.91117	14435	13898	31011		7.298	16224	14950	38897		7.41013	15440	16353	18379		6.5748	13819	13623	14456
7.91528	14730	14009	31100		7.3021	15978	14927	26915		7.41422	15511	25506	18893		6.57888	13760	12797	14918
7.91933	14972	14077	27255		7.30618	16451	14404	27321		7.4183	15838	37681	19260		6.58297	13983	12874	14546
7.92345	14711	15054	26598		7.32083	14676	14333	27949		7.43295	15319	36359	19354		6.58705	13800	13940	15352
7.92752	14483	14005	30379		7.32495	14251	14611	23038		7.4476	17352	27481	19594		6.59113	14115	13172	14789
7.93162	14071	14249	32443		7.32902	14966	14318	22122		7.4517	18085	20264	19990		6.59518	13648	14218	13973
7.93568	14770	13978	35031		7.33312	14774	15682	23226		7.4558	23051	17151	21286		6.59927	13563	13587	14601
7.93977	13927	15343	43163		7.3372	14269	15685	24334		7.47053	38160	17669	29123		6.60335	14419	13880	14254
7.94385	14398	14975	32553		7.3413	14831	15522	29512		7.4852	54543	19634	47736		6.618	15131	13401	14252
7.94793	14942	13760	27564		7.34538	15347	16139	32439		7.49995	46175	24681	71594		6.62212	15128	14697	14406
7.95202	14951	14528	24142		7.34948	14890	15625	30920		7.5147	29395	45562	60621		6.62617	15297	13711	14010
7.95612	14798	14276	22151		7.35357	15079	15351	28187		7.52937	19805	71127	36067		6.63027	15714	13762	14680
7.96018	14821	14278	19864		7.35765	14115	16028	22103		7.544	17700	63109	24886		6.64487	17255	13514	14352
7.96428	15117	13925	19533		7.36172	14506	15406	22701		7.5481	17695	43390	20562		6.64898	17510	13346	14303
7.96837	15033	14517	19338		7.36582	15048	15343	19962		7.55218	17809	26824	17204		6.66358	17209	12787	14391
7.97247	14394	14776	18581		7.38043	15900	15492	21110		7.55628	21028	27979	18582		6.67833	15568	13220	14659
7.97655	14637	14430	18257		7.3951	15877	16952	20326		7.56037	24018	33811	17805		6.68242	15448	13720	14319
7.98065	14359	14742	19343		7.39922	16269	17421	22476		7.57502	56654	31639	18079		6.68648	14675	12512	14739
7.98472	14523	14333	18199		7.41382	16113	21014	23093		7.58972	105948	31941	18585		6.69058	14643	13383	14746
7.98882	15082	14579	17757		7.42847	21057	23364	21940		7.6046	47169	27235	19935		6.69467	15000	13035	14730
7.99288	14574	14433	18183		7.44313	29354	21046	19936		7.61923	43552	22013	22057		6.70928	15069	12522	14326
7.99698	14447	14225	18257		7.4578	31556	18016	19413		7.63398	35642	16717	27132		6.71338	14925	13127	14644
8.00107	15213	14666	18897		7.47257	25047	16275	18328		7.64877	37667	16260	32368		6.71747	15496	13956	14436
8.00517	14352	15202	17414		7.48723	19631	16067	18657		7.66362	43983	16404	32726		6.72155	14601	13565	14971
8.00925	14394	14965	18492		7.50198	15979	15460	18543		7.67843	48896	14874	28058		6.72563	15029	13965	14421
8.01335	15673	14780	18108		7.50607	16208	16078	17303		7.69332	41649	15910	27222		6.7297	14630	14136	14473
8.02793	15081	14410	18651		7.51015	16318	16484	19412		7.7081	37508	15092	27332		6.73378	14872	14538	14471
8.03203	16184	14205	17654		7.51428	17309	17251	20448		7.72287	27653	14152	39942		6.73788	13465	15967	14664
8.03613	14958	14656	18881		7.5184	18217	17966	22933		7.7377	20773	14447	61579		6.74195	15306	18187	14018
8.04022	15495	15219	17960		7.5225	21022	23458	24789		7.75235	15944	15023	81085		6.74605	13278	16601	15108
8.04432	15304	15264	17490		7.5266	31806	42108	24601		7.75645	16139	15064	60426		6.75012	13340	14544	14892
8.04842	15603	14357	18858		7.54125	90795	78398	19607		7.76052	15273	14850	43679		6.75422	13976	13140	15005
8.05248	14377	14874	18240		7.5561	142045	67641	18806		7.76462	14945	13848	37982		6.75828	13166	13313	15532
8.05657	14776	14526	18292		7.57093	58650	46221	17103		7.76868	14704	14462	31628		6.76238	13524	13781	15707
8.06067	14318	14266	18786		7.5857	54026	27246	17952		7.77277	14653	15064	27932		6.76647	14327	12834	15705
8.06475	14920	14430	17387		7.6005	35246	19961	17269		7.77683	15792	14230	23858		6.77057	13653	13313	17658
8.06882	15194	14903	18088		7.61523	27347	16676	17842		7.78092	14983	15513	20864		6.77465	13776	13612	19377
8.07293	14979	15893	18369		7.62987	19687	17023	18806		7.78498	14363	14921	21929		6.77873	13542	12433	22066
8.077	15090	15221	18463		7.63398	18281	16775	20008		7.78907	14250	16068	20597		6.7828	13535	13695	21744
8.08112	15993	15597	18109		7.63807	18736	18287	21184		7.79313	14925	15443	19662		6.7869	13647	12914	18711
8.0957	28157	15077	17260		7.65272	19407	22780	22119		7.79722	14129	17036	22524		6.79097	14719	12689	18239
8.11035	102489	18190	18674		7.66738	21752	25514	26366		7.8013	14688	16017	20776		6.80557	14205	13286	20278
8.12517	145410	29729	17184		7.68205	23792	24044	46653		7.8054	14636	16989	19799		6.80968	14399	12861	17950
8.14008	252469	108114	19091		7.69688	20094	18950	78342		7.80947	14845	16498	19159		6.81375	14567	12791	18353
8.15497	127938	114726	17932		7.71165	18064	16474	75493		7.8241	16494	16246	18787		6.82838	14658	13450	17126
8.16972	118084	223147	17742		7.72627	16132	15848	50073		7.82818	17071	16538	18880		6.83247	14961	12911	16308
8.18447	93793	99650	17545		7.73038	15650	15613	39612		7.83227	17302	15171	18610		6.83655	14665	13126	15364
8.19925	62764	86999	17278		7.73448	15654	15819	34605		7.84692	17607	15736	19129		6.84065	15168	12719	15780
8.21398	98215	54903	17917		7.7386	15194	14389	28050		7.85103	16727	14908	18823		6.84473	14174	12735	15675
8.22877	170631	56274	17553		7.74267	15787	15153	27277		7.85513	17214	15782	18984		6.84882	14499	12782	16026
8.2437	95964	98965	17664		7.74678	14708	14629	24689		7.85925	16531	15330	18001		6.85287	13925	13335	17043
8.25857	129635	150448	17211		7.75085	14628	13583	21047		7.86332	15593	15466	18332		6.85695	14593	12255	17511
8.27343	92676	90059	16290		7.75495	15343	15056	21582		7.86742	16139	17720	17820		6.87158	14250	13060	18207
8.2881	58146	89492	15973		7.75905	14789	14582	19613		7.8715	15700	17223	18078		6.88622	13857	13082	17114
8.2922	64626	71480	17062		7.76317	14250	14493	20459		7.8756	15476	16552	18311		6.89032	13870	12962	18709
8.30683	38643	48611	16427		7.76725	14299	14953	21729		7.8902	16208	16772	16947		6.89438	13534	12754	18946
8.32153	25118	35936	16308		7.77135	15116	14923	23286		7.89433	16111	15911	16927		6.89845	12971	13185	17580
8.33622	19111	22877	16660		7.77543	14671	15759	23545		7.90898	17088	15958	16900		6.90252	13410	12774	16423
8.35098	18311	20843	15986		7.77953	14780	15600	26899		7.9131	16552	14633	16847		6.90662	13263	12856	16310
8.3551	17002	19500	17125		7.7836	14532	15447	23690		7.91715	18295	15194	16815		6.91068	12774	12775	15739
8.35917	17381	19116	16974		7.7877	15365	15917	23029		7.93188	17723	15713	17126		6.91477	12844	12687	15484
8.3738	15664	17733	17744		7.80232	15226	15468	24206		7.93598	16661	14478	17467		6.91887	12240	13756	15984
8.3779	15780	16416	16751		7.80642	16133	16190	22500		7.94007	16364	14555	17053		6.92297	13075	12984	15438
8.38198	16401	16665	16980		7.82105	16115	16316	23540		7.94417	15381	14059	17629		6.92703	12673	12814	15637
8.38608	16217	15631	17450		7.83572	15795	15802	23227		7.94823	16745	14664	18055		6.93113	13085	13212	15098
8.39017	15912	15593	17111		7.83982	16603	16058	28387		7.95233	15856	13903	18314		6.9352	12731	13034	14666
8.39427	15494	16044	17893		7.8439	16182	15737	27179		7.9564	15692	15074	17762		6.93928	12842	13163	15001
8.39837	16067	14842	17339		7.85857	16791	17005	24647		7.96052	15224	14577	17998		6.94333	13125	12341	14810
8.40245	14559	15830	16741		7.86268	15946	15931	20839		7.96458	14777	14992	18976		6.94743	12864	13200	15854
8.40652	15473	15172	17444		7.86678	16026	15676	19944		7.9687	14649	14604	18147		6.95148	12917	13323	15375
8.41065	15710	15114	17404		7.88147	17165	15377	18208		7.97277	13860	14635	18522		6.95558	12563	13214	15235
8.41477	15676	16314	16564		7.89622	16314	15091	18811		7.97685	14754	14806	19558		6.95967	13598	13484	14936
8.41885	16252	15579	17562		7.90033	16283	14867	18010		7.98092	14399	14408	17344		6.96375	12571	13740	14910
8.42295	15813	15423	17648		7.91495	15392	15651	17766		7.98502	14493	14364	17942		6.96782	12726	14719	15031
8.42702	14770	15407	17896		7.92958	14886	14456	16733		7.98908	14811	14029	16576		6.9719	12870	14204	14824
8.43113	16197	15836	18312		7.93368	14562	14252	17787		7.99317	15168	14820	17311		6.97597	12973	14361	14330
8.44575	16879	15168	17941		7.93777	14807	14213	17967		8.00778	15776	14139	17199		6.98005	12585	14502	14792
8.44985	17390	15102	17736		7.94185	14684	13682	17710		8.02243	16064	13790	17300		6.98413	13434	14301	14971
8.45393	18771	15144	16873		7.94593	15078	14626	16672		8.02653	14533	14690	17008		6.98822	12902	13799	14569
8.4687	18373	14871	18110		7.95003	14712	14668	16605		8.0306	14985	14121	17210		6.99228	12678	13445	13668
8.47282	17997	15361	17330		7.9541	14454	14784	16701		8.0347	14629	14216	16442		6.99637	13704	13128	14687
8.47688	16637	15576	17501		7.9582	14488	14092	17939		8.03877	14128	14299	17999		7.00043	13597	14191	14495
8.48098	17397	15386	17315		7.96227	14159	14683	17429		8.04287	13575	14410	16907		7.00455	13162	13403	14436
8.48508	16491	16221	17889		7.96635	14578	13898	17691		8.04692	14545	13324	17399		7.0086	13425	12840	14413
8.48932	17062	16304	18914		7.97043	14952	14150	18346		8.051	14562	14164	16860		7.01268	13205	13114	15168
8.49343	16495	17914	20316		7.97453	14110	14238	18012		8.05508	14776	14253	17113		7.01675	13272	13219	15301
8.49752	17395	16669	41402		7.97858	14949	14409	18393		8.05918	14518	14614	17045		7.02085	14158	13099	15136
8.50165	15617	16928	129298		7.98268	14531	14206	17100		8.06325	14053	14364	16470		7.02493	13492	12435	15839
8.50575	16289	17408	277179		7.98675	14001	14664	17443		8.06733	14337	13799	17557		7.02902	13894	12922	15112
8.50982	16835	16397	113494		7.99085	14652	14901	17846		8.0714	14511	13643	16233		7.03308	14654	13383	16118
8.52448	15595	16744	93125		7.99492	14518	15046	17285		8.07548	13849	14113	16707		7.0372	13829	11942	16310
8.5286	15342	15936	51590		7.99902	14480	14260	17848		8.07955	14488	13879	15894		7.04125	13615	12828	15687
8.53267	14700	15639	28388		8.00308	14534	13792	17828		8.08363	14367	14104	16405		7.04533	13319	13669	15046
8.53677	15010	14948	20112		8.0177	14868	14653	18107		8.08772	14503	13551	16228		7.0494	13057	12884	15073
8.54083	14081	15723	18847		8.03235	15670	14746	18581		8.0918	13956	14292	15930		7.0535	13103	12895	15196
8.54495	14900	15068	17584		8.04702	14891	13966	18081		8.09587	14768	14786	16367		7.05757	12903	13289	16073
8.54902	15400	16004	17446		8.05112	14279	14870	18700		8.09997	15172	16902	16885		7.06165	13990	13261	16276
8.55312	15119	14843	17224		8.05518	14578	13923	17948		8.10402	14377	19912	16618		7.06572	13237	13870	17601
8.5572	14847	15495	18380		8.05928	14459	14257	17562		8.1081	14375	22266	16493		7.0698	13189	14271	17668
8.5613	15010	14613	18081		8.0739	14766	14942	18124		8.11217	14288	21408	16164		7.07388	13408	14591	17687
8.5654	14824	15120	18684		8.078	15081	13972	18081		8.11625	15260	17918	16971		7.07798	12901	14068	19375
8.5695	14698	14879	19995		8.08208	14302	14960	16375		8.13088	16988	15392	16270		7.08205	13936	13944	25309
8.57357	14813	15072	19352		8.0862	15897	14675	16724		8.14552	17757	14574	15663		7.08615	13063	14226	36615
8.57767	14345	14823	20834		8.10082	20560	14570	16715		8.14962	18995	14424	16652		7.0902	12704	14440	41564
8.58175	14660	14958	24276		8.11547	24889	13698	16804		8.16435	17864	15188	17258		7.0943	13819	14646	31856
8.58583	15151	14352	30450		8.13012	24901	14392	16871		8.179	17065	13824	18037		7.09837	12783	13828	22696
8.5899	14545	14549	50847		8.1448	30864	14739	16460		8.1831	15795	14616	18519		7.10245	13094	13993	17539
8.59398	14386	14662	94726		8.15967	27963	14086	16915		8.19772	15276	14364	19956		7.1065	12812	13610	15440
8.59805	14463	14376	138457		8.17443	24465	14283	17194		8.2018	14301	15170	22463		7.11058	13409	14005	15468
8.60217	14019	14288	99449		8.18922	19288	14591	17823		8.20588	15502	17061	31806		7.11462	12895	13231	14715
8.60623	14048	14436	63984		8.20387	25749	14728	17099		8.20998	14457	18525	95313		7.1187	13271	13053	15683
8.61033	15236	14666	34213		8.21855	58212	15530	17288		8.21405	14486	23831	249925		7.12277	12892	12933	16029
8.6144	14931	14496	23418		8.23323	112257	16149	17266		8.21815	15016	43782	113025		7.12685	12908	13555	15566
8.6185	14644	14519	20364		8.24815	56557	17286	16497		8.22222	14403	76782	104250		7.13092	13451	13628	15311
8.62258	14566	14166	19381		8.26288	62918	21450	17459		8.22632	14685	60844	61792		7.13502	13543	13094	15696
8.62668	14794	15024	18883		8.2777	49031	26963	16288		8.23038	16169	43935	31521		7.13908	13489	13548	15660
8.63073	15714	14664	19901		8.29247	37021	26266	16346		8.2345	16104	30046	20471		7.14318	12449	12838	17435
8.63483	16704	14965	19973		8.30727	25313	26031	15869		8.23857	17507	24326	18645		7.14723	12933	12635	18973
8.6389	16214	15062	20358		8.32192	19493	27755	16093		8.24268	21440	20491	18944		7.15132	12950	13151	18856
8.64302	17989	15745	20168		8.32605	18026	23472	16756		8.25745	36386	17408	18139		7.15537	14101	12862	19894
8.65765	33577	16402	25112		8.33015	17205	19251	16233		8.2722	57148	16094	17659		7.15945	14505	13076	18729
8.6724	57448	18752	27235		8.33423	16777	19201	16574		8.28687	56145	16379	16903		7.16352	15546	12771	18533
8.68723	64281	20058	27422		8.33833	17717	23765	16839		8.30173	40941	15460	17401		7.16762	17571	12719	17946
8.70205	44464	37171	23978		8.34242	16412	43185	16638		8.31642	27584	15602	16358		7.1822	39326	12728	18843
8.71697	27805	59774	20725		8.34652	16222	88458	16105		8.33108	24978	15893	17037		7.19707	76290	13038	17758
8.73173	19837	67164	19986		8.3506	16825	80349	16039		8.34583	21672	14434	18089		7.21192	89717	12843	17950
8.74638	20173	44386	19264		8.36525	15278	66940	16534		8.3606	17700	15401	17171		7.22698	53828	13133	19085
8.76118	19376	25035	18103		8.36937	16162	48332	17306		8.36472	17646	15104	17897		7.24185	26048	13115	17101
8.7758	18826	18831	19420		8.37345	15277	31912	16339		8.37937	16821	15247	18174		7.25667	17267	12786	16907
8.77992	18528	18546	20787		8.37755	16165	25483	17371		8.38348	16079	15605	18335		7.27128	13971	12635	17158
8.78398	19954	18552	21329		8.38162	15497	17665	16088		8.38755	16023	14853	19009		7.2754	14264	12920	16874
8.78812	20635	17995	23623		8.38572	14992	17738	16001		8.39165	15579	14580	24822		7.27947	13533	12785	18451
8.80287	23525	18649	65164		8.3898	15629	17677	16749		8.39572	15928	14819	40666		7.28355	13952	12678	17190
8.807	25277	18234	196413		8.3939	15346	17640	16607		8.39983	15682	15358	66608		7.28762	14678	12995	17549
8.81112	28118	18084	113023		8.39797	15917	17054	16214		8.40392	15245	14949	102487		7.30223	13827	12980	17150
8.82587	27847	18471	161334		8.40208	14871	15999	17133		8.40802	15983	15204	118634		7.30635	14280	12620	17209
8.84068	27475	21799	94814		8.40617	15497	15358	16699		8.41212	16147	15219	91732		7.3104	14369	12666	17549
8.85537	24834	22993	52452		8.41028	14781	16017	16542		8.41623	15468	14425	48522		7.3145	14144	13625	17961
8.87013	20927	22224	28289		8.41437	15137	16772	16834		8.4203	15766	15185	27116		7.31857	13762	13242	18706
8.88477	19243	23670	22405		8.429	15383	14706	16634		8.42442	15367	14552	20674		7.3332	14195	13223	18299
8.89943	23246	22748	21363		8.43313	14494	15213	16637		8.42848	15428	14310	19627		7.34785	13913	13039	17485
8.9141	27804	23624	21942		8.43725	16039	15074	17261		8.4326	15876	14508	19263		7.35195	13619	13338	16916
8.92892	30484	20341	22121		8.45187	16025	15521	16742		8.43667	15403	14532	19198		7.35603	13364	13715	16428
8.94375	29731	18224	21630		8.45598	15980	15709	16455		8.4408	15603	15036	18869		7.36013	13732	13763	16707
8.9585	25291	17149	23621		8.46007	15915	15733	16853		8.4449	15735	14918	18605		7.36422	13879	13122	16473
8.97315	20289	18121	21867		8.46417	16805	14706	16549		8.44898	16195	15357	18786		7.3683	14213	12875	16785
8.97727	19875	21125	20478		8.46827	15833	15564	16266		8.45308	15618	15738	19199		7.37237	14557	13320	16106
8.98137	19355	21765	21774		8.47237	16621	15736	16783		8.45713	14887	15013	21200		7.38698	13339	13406	15695
8.98548	19512	29391	23198		8.47647	16622	15227	16327		8.46125	15911	15351	20343		7.39108	14604	12926	15178
8.98958	20655	25934	23927		8.48057	15466	15827	16917		8.47585	16243	15611	21413		7.39517	14088	13035	15192
9.00433	19358	24490	23030		8.48465	16265	17047	17360		8.47997	17058	16358	23462		7.39925	14115	12460	15493
9.00845	19173	21702	24327		8.48877	15753	14898	16324		8.48405	18089	15733	26594		7.40333	14754	12930	16046
9.01255	18982	18852	25379		8.49285	15088	15604	17999		8.49867	16593	16556	28144		7.41795	14510	12431	15460
9.0272	17891	17766	23881		8.49697	15564	16172	20321		8.50277	17201	16999	27996		7.42205	15353	12578	14476
9.04185	16109	17896	24155		8.50103	15596	15116	25863		8.50685	18901	15730	24435		7.42613	14824	12337	15533
9.046	16017	17527	22979		8.50513	15711	15198	62737		8.5215	16534	15530	21293		7.43023	14776	12933	15066
9.05008	16169	17589	22626		8.50923	15845	15943	132135		8.53613	17120	15647	20327		7.44485	14337	12931	14657
9.05417	15791	17401	22440		8.51335	15196	16608	141979		8.55075	16142	15912	20042		7.44893	13706	12675	15209
9.05828	15572	15954	21187		8.51743	15240	16238	84754		8.55487	15487	14498	21963		7.453	14489	13354	15155
9.0729	14735	16999	22916		8.52153	14434	17065	46306		8.55895	15447	15073	24196		7.45712	14144	13119	15846
9.077	15772	15543	22829		8.5256	15150	17438	24299		8.56305	15336	14790	71526		7.46118	13842	12962	16318
9.08107	15954	16951	24103		8.52973	15002	16628	18423		8.56712	15610	14788	192776		7.46528	13318	12583	15363
9.08517	15517	15723	24341		8.53385	15326	15388	18345		8.5712	14847	13830	120855		7.46937	13444	12939	15587
9.08923	15982	16341	25035		8.5379	15367	15354	17804		8.57528	14689	14954	148719		7.47347	13992	12335	14586
9.09333	15967	15165	24943		8.54202	14582	15263	17575		8.5794	15034	14542	90990		7.47752	13971	12452	15779
9.0974	16210	16030	24101		8.5461	14633	15244	17702		8.58347	14785	14777	48725		7.4816	13483	12876	15672
9.1015	16641	15434	24234		8.55022	15301	15744	16844		8.58755	15369	14652	33167		7.48565	13872	12366	15326
9.11615	16791	16184	25744		8.5543	15263	14823	16844		8.59162	15218	14789	28464		7.48973	14471	13239	15571
9.1309	18544	15768	24329		8.55842	14340	15303	16894		8.5957	15054	14574	25626		7.4938	14055	12710	14767
9.135	18356	15982	23039		8.56248	15198	14210	17577		8.59977	14100	13903	26110		7.4979	14108	12665	15576
9.14977	19142	14877	24263		8.56657	14435	14244	17519		8.60387	14106	14793	27273		7.50198	14044	13039	15722
9.16465	20166	15841	21335		8.57067	14108	14827	18226		8.60793	14592	14642	26237		7.50607	13939	13071	15987
9.1794	25752	15311	22444		8.57475	14878	15003	18060		8.61203	14318	13758	26610		7.51015	14131	12682	15661
9.19418	47062	14709	21576		8.57882	14154	14088	18218		8.6161	14231	14646	26292		7.51423	13388	12807	15316
9.209	92339	15796	20253		8.58293	14587	14078	17601		8.62018	14663	14130	25297		7.5183	14133	12182	15496
9.22395	110129	15921	21454		8.58702	14810	14443	18198		8.62425	13803	14448	25779		7.52242	13762	13342	16033
9.23892	74178	16118	22115		8.5911	15131	15581	18665		8.62833	14312	14984	27707		7.52648	14415	12453	15662
9.25388	59910	16446	21607		8.59518	15979	14314	19554		8.6324	13465	13993	28033		7.53057	13422	12425	14825
9.26872	29877	17473	20952		8.59928	14438	14773	21450		8.63648	14199	14018	27308		7.53462	13817	13292	15626
9.28353	20312	17223	21224		8.60335	15035	15299	24088		8.64055	14643	14557	26676		7.5387	13398	12731	15256
9.29817	16207	17141	21499		8.60747	15225	15222	27320		8.64463	14033	14846	23859		7.54277	13231	13660	15403
9.31278	16829	17733	22231		8.61153	15112	14356	45661		8.6487	14354	14036	24671		7.54685	13288	13208	15131
9.32743	16381	17933	22205		8.61563	15362	14418	66003		8.65282	14498	14171	23560		7.55092	13303	13592	15748
9.33155	15244	17893	22559		8.6197	14902	15087	77646		8.65688	14262	14695	25215		7.55502	12891	13979	15270
9.33562	16118	22363	21795		8.6238	14343	15201	56154		8.66098	14797	15025	24152		7.55908	13506	13685	15178
9.3397	15469	22033	23432		8.62787	14477	14860	31993		8.66505	13589	15183	24065		7.5632	14104	14163	15709
9.34378	16245	36403	21898		8.63197	14926	14324	21121		8.66915	14377	16272	25137		7.56727	14302	15489	15676
9.3479	15348	65004	23180		8.63605	15953	14937	17733		8.67323	15035	20321	24945		7.57137	14561	18380	16047
9.35197	15495	85451	23759		8.64017	15193	14445	18130		8.67733	15727	24035	25419		7.57545	14216	16511	15091
9.35607	15793	79183	25752		8.64423	15063	15379	16867		8.6814	16476	44593	25410		7.59007	14413	16501	15716
9.36013	16605	48450	25342		8.64835	15773	14656	17651		8.68553	17639	60871	27717		7.59418	13817	16084	15654
9.36425	17297	28460	25814		8.65242	16038	14662	17403		8.68962	20492	54480	27994		7.59825	15446	15035	15591
9.36833	18279	26253	24711		8.66708	22759	13934	17182		8.6937	22382	28385	26059		7.6129	15365	14759	14646
9.37243	19621	21794	26046		8.68173	31984	14257	17824		8.6978	29200	19375	26640		7.617	15199	13299	15173
9.38707	30694	21271	22961		8.6965	39140	15359	17837		8.7126	50434	17801	25201		7.63162	15194	13455	15788
9.40187	33688	20317	22784		8.71132	30254	15909	16837		8.72738	64131	17549	25804		7.64623	14504	14161	15104
9.41657	33167	18334	22648		8.72618	24069	18496	18347		8.74232	45489	15266	24186		7.65033	14022	13848	15584
9.43142	25947	16352	21856		8.74083	26885	20957	18328		8.75723	24843	15236	23861		7.6544	14174	13204	14952
9.44615	21408	16145	20894		8.7556	24730	24906	17589		8.77188	18693	15684	23834		7.65848	14105	14117	14671
9.46082	18787	16568	20876		8.77035	24657	29706	18736		8.78655	17181	15988	23570		7.66257	13641	13437	15253
9.47545	16705	15743	21632		8.78502	30080	44264	19179		8.80118	16265	17949	23401		7.66665	14406	13665	15564
9.47957	16733	16318	20846		8.7997	44539	51125	19506		8.81582	18199	17324	23345		7.67073	14072	13060	14935
9.48365	16895	15298	20930		8.81448	57693	34687	18820		8.81992	18320	18597	22413		7.67482	15256	13048	15486
9.4983	15584	15586	20501		8.82927	51388	25230	19749		8.824	18849	20872	21211		7.68947	15834	13414	15006
9.5024	15501	15501	21369		8.84412	39062	24607	21279		8.83862	21223	22726	22503		7.69357	17557	14241	15129
9.50648	17128	14974	21693		8.85883	30964	25018	21127		8.84273	22254	21912	21749		7.7082	20038	12970	14425
9.51057	16551	15779	19678		8.87385	22961	25905	21680		8.84682	25071	23786	21478		7.72293	18602	13292	14724
9.51465	16478	15066	20602		8.88862	19287	22343	20363		8.86157	24868	19964	22067		7.73758	16584	13119	14430
9.5293	15480	15410	20003		8.90327	19790	23353	18999		8.87623	24407	17260	21945		7.75235	14957	12869	15651
9.5334	15905	15691	20997		8.91795	21190	30199	19026		8.88035	25051	17782	22203		7.75645	13575	13408	14236
9.53748	16436	16718	20726		8.9326	24883	39399	19915		8.89502	21819	17706	22364		7.76055	15191	12541	14169
9.5416	16574	17584	20250		8.94743	23186	42235	20326		8.90982	17630	16777	22616		7.77518	13816	12807	15532
9.54567	16742	20882	21147		8.9622	18673	37579	21467		8.91393	18176	17919	22584		7.77928	13663	12279	15047
9.54977	15200	22705	19332		8.97687	17693	31675	25018		8.918	17989	16862	24153		7.78337	13972	13609	15721
9.55385	15662	30915	21069		8.981	17988	21302	59674		8.93268	17139	15766	24587		7.78745	13257	13482	14768
9.55795	16099	29707	20250		8.98512	17133	20175	124262		8.9368	17411	15339	26250		7.79153	13891	12944	16121
9.56202	15218	24510	20680		8.98922	19336	20808	67181		8.9409	18572	15147	24686		7.79563	13169	12786	15804
9.56613	16427	24163	19843		9.00383	22571	18445	67533		8.95553	16918	14944	27241		7.7997	13873	12440	15391
9.57022	15941	20510	20974		9.01852	24548	18443	45549		8.95963	16850	14523	26108		7.80378	14104	12864	15977
9.57433	16663	17735	20227		9.03317	25704	19335	25072		8.96372	15704	15024	25055		7.80787	14472	13026	15408
9.57842	16271	18334	19485		9.048	18236	22005	24586		8.96782	16183	14871	21281		7.81195	15251	13269	15364
9.58253	16477	17914	20367		9.05212	17995	22927	20761		8.97188	15565	16065	21293		7.82657	13735	12922	15287
9.58658	15739	17805	19773		9.0562	16256	19479	21116		8.97598	15487	15641	20968		7.83067	14327	12939	15526
9.59068	16499	18074	20202		9.0603	15352	17718	20453		8.98007	15893	15174	20989		7.83473	14668	13337	15345
9.59475	16386	16482	19799		9.06438	15348	17206	19801		8.98417	15460	14750	20714		7.83883	13563	13009	15271
9.59885	16040	16418	19866		9.06848	16035	17358	21141		8.98822	15039	15399	20291		7.84292	14183	12819	15164
9.60293	16339	16377	20187		9.07257	16403	17354	20773		8.99233	15067	15802	19758		7.84702	14207	12658	16237
9.60703	15784	15885	19521		9.07668	15872	17108	20302		8.9964	15447	14888	19479		7.8616	14593	12659	14483
9.62165	15436	16172	21462		9.08077	15872	18550	19821		9.0005	15225	15305	19483		7.8657	14397	13142	15509
9.62575	14923	16430	24058		9.08488	16397	19122	20767		9.00458	15299	15634	20411		7.86978	13561	12858	16267
9.62983	15349	15325	23558		9.08898	15501	20672	20448		9.0087	15325	14632	19431		7.87388	13430	13777	14803
9.63393	15686	16429	25259		9.09308	16428	23114	20138		9.01278	15783	15477	19022		7.87795	13453	13047	15612
9.638	15841	15965	41526		9.1077	15563	23453	21480		9.01688	16510	15307	18518		7.88205	13515	13716	15587
9.64212	15949	17299	86982		9.1118	15887	19594	22241		9.02095	15234	16015	18314		7.88612	13705	12668	14651
9.64618	15605	16165	98419		9.11587	16417	19593	23055		9.02505	15959	14914	19161		7.89018	14622	12552	15203
9.65028	15469	16161	67502		9.13053	16862	17240	22010		9.02913	16471	14905	19624		7.89428	13163	13249	15011
9.65435	14456	16374	39249		9.13463	16479	16899	22698		9.03323	15147	15526	18414		7.89838	14883	13462	14713
9.65845	15569	15843	27244		9.13873	17080	17296	22536		9.0373	15152	14456	18516		7.90247	13437	13725	15158
9.66252	15081	15855	22429		9.14285	17336	17333	23497		9.04142	16718	15143	19658		7.90655	13733	13016	15625
9.6666	15095	16185	22165		9.14692	17645	16220	21409		9.04547	15802	14692	18921		7.91062	14147	13538	15143
9.67068	15107	15507	23378		9.16158	21676	15894	20975		9.04957	15514	14796	19050		7.9147	14111	12890	15166
9.67478	15354	15723	26128		9.1657	22371	16115	22520		9.05365	15644	14739	18789		7.91878	14388	13110	15317
9.67887	15593	16645	25487		9.18037	31884	16105	22045		9.05775	16349	14575	19450		7.92287	14586	13158	16597
9.68297	15667	16016	23424		9.19533	32249	16721	22341		9.06182	15953	14801	18809		7.9375	14004	13290	16625
9.68702	15933	16672	22832		9.21012	32593	15594	22985		9.06593	15634	14906	18964		7.9416	13893	13469	19874
9.69113	16491	17206	23514		9.22482	37452	15778	22485		9.07	15869	14375	18727		7.94565	14033	13187	31911
9.6952	15960	15732	22219		9.23965	33556	15831	22337		9.0741	15863	14276	18930		7.94973	13400	13369	70905
9.6993	15923	16257	23698		9.25447	26943	14802	22864		9.07817	15474	15885	18865		7.9538	14006	13040	127318
9.71392	15195	15188	21967		9.26917	20117	15361	22492		9.08228	15328	15487	18647		7.95788	13814	12841	101202
9.71802	15335	15821	22881		9.2733	18600	15388	22837		9.08635	14787	15588	18896		7.96197	13630	13516	56789
9.72212	14896	16503	23056		9.27742	18093	16347	22649		9.09047	15272	15939	18341		7.96607	14166	13266	28514
9.72622	15380	15652	22197		9.29207	17202	16410	22733		9.09453	15323	15662	18966		7.97012	13493	13449	18154
9.73027	15571	15048	21603		9.2962	16734	16885	20540		9.09863	15329	15164	18100		7.9742	13213	13189	17203
9.73437	15878	15370	21110		9.30028	16510	17132	21316		9.11323	15423	15212	20038		7.97828	13404	13332	15953
9.73843	15564	15864	21190		9.30438	16815	19862	21284		9.11732	14933	15000	19939		7.98237	14095	13012	16613
9.74253	14748	15530	21186		9.3085	16766	23336	20651		9.12138	15199	15342	20064		7.98642	13100	13554	15468
9.74662	15955	15079	22561		9.32315	16995	28067	20262		9.12548	15685	16099	20343		7.9905	13161	13410	15832
9.75073	15569	15419	22461		9.32727	16572	28475	20428		9.12953	15158	14894	20684		7.99457	13870	13468	15528
9.75482	14676	15477	21134		9.33135	16902	33819	20094		9.13365	15244	15293	20655		7.99867	13285	12112	15826
9.7589	15135	15084	21403		9.34602	16086	31610	20325		9.1377	15797	18584	21761		8.00273	13374	13427	15111
9.76297	14541	14878	19935		9.35012	16102	28490	19279		9.15235	16107	18119	20658		8.00683	13572	13240	15675
9.76707	14965	15646	20331		9.3542	16481	20550	20194		9.15645	15668	18386	22714		8.0109	13445	14171	15183
9.77113	15377	15367	20260		9.3583	16700	19742	19977		9.16053	14870	19383	20551		8.015	13864	12855	14612
9.77523	15272	16200	20297		9.37292	16925	19813	19334		9.16463	15876	17725	20371		8.01905	13679	13145	14881
9.77928	14617	15560	20698		9.38768	19728	18494	19479		9.1687	15705	18364	19106		8.02315	14234	12590	15576
9.78338	15403	15876	19278		9.40235	23699	17403	19321		9.17282	15197	16725	18574		8.02723	13816	14061	15827
9.78745	14938	15039	20753		9.41705	23985	16362	19963		9.17687	16836	16257	18689		8.03133	13279	12840	16030
9.79157	15337	15825	21372		9.43193	21197	16080	19261		9.1915	17546	15811	18100		8.0354	13179	13524	16904
9.79563	16171	15205	20126		9.43605	19995	16485	19919		9.1956	17612	15773	18582		8.03948	13778	12922	18414
9.79973	15213	16552	19842		9.4507	17975	16663	19218		9.19968	18743	14412	18368		8.04355	13780	13253	18336
9.8038	15166	16117	20008		9.4654	17796	17076	18949		9.21445	20110	15521	19197		8.04765	13926	13781	18463
9.8079	16179	15331	18416		9.46953	17513	17058	19689		9.22907	17512	15500	18380		8.0517	13461	13802	29228
9.81195	15276	15163	20434		9.47365	16903	17437	19879		9.23317	17246	15237	18908		8.05578	13712	15282	43627
9.82658	15855	15189	20496		9.47775	16480	16420	19260		9.23725	17570	15271	21496		8.05985	13321	15369	58032
9.8307	15695	15557	19109		9.48185	17095	15877	19317		9.24137	17555	16090	23683		8.06393	14239	16465	60442
9.83478	15629	15396	19241		9.48595	18004	16021	19834		9.24545	16323	14818	24890		8.068	13401	17099	48640
9.8389	16608	15757	18804		9.49005	16824	15891	21311		9.24955	16519	15602	24753		8.0721	13656	15041	29640
9.84295	15428	15211	18424		9.49413	16477	16144	20079		9.25362	16193	15764	22281		8.07617	14022	15295	20884
9.84707	16574	15413	19946		9.49823	16800	15667	20397		9.25772	15917	15764	22729		8.08027	13478	15039	17079
9.85113	17087	15645	18608		9.51285	17184	16528	20131		9.26178	16397	16627	23276		8.08435	13867	13564	16511
9.85525	15875	15789	19214		9.52747	17156	16911	20319		9.26588	15805	15257	23037		8.08845	13746	14854	17325
9.85935	16032	15590	19311		9.53158	17184	16418	20973		9.26997	16105	15838	22484		8.0925	13767	13670	17403
9.86345	16995	14908	18439		9.53568	18228	21023	20313		9.27408	16344	15711	22960		8.0966	13892	14078	17231
9.86755	15966	15650	18620		9.55032	17204	26159	20211		9.27817	16219	16020	21531		8.10067	13573	12888	16127
9.87165	14927	14762	17973		9.55443	16271	23474	19976		9.28227	15489	16355	21811		8.10473	13432	13188	16959
9.87573	15776	15944	18211		9.55853	16212	21974	19743		9.28635	16012	17750	22123		8.10882	13121	13763	15621
9.87982	16213	15382	18245		9.56263	16234	19421	20035		9.29045	15995	19303	21168		8.11292	13096	12571	16236
9.8839	16227	16490	18118		9.5667	17120	18638	19329		9.29452	16377	20233	21725		8.11698	14327	14033	15752
9.88802	14787	16674	18678		9.57082	16717	18064	19512		9.30917	15627	22597	21816		8.12108	13815	13396	16237
9.8921	15465	16210	19199		9.57488	16828	17523	19140		9.31327	15636	23431	21254		8.12517	14141	14099	15949
9.89618	16031	15509	17290		9.579	16680	17757	18637		9.31733	15989	27827	21143		8.12925	14112	13004	16380
9.90027	16257	14935	17759		9.58308	16695	16837	18135		9.32143	16107	54456	20365		8.13333	13341	13362	17072
9.90435	15258	15616	17753		9.59773	16343	16309	19106		9.3255	16607	77043	21514		8.13743	13877	13294	17063
9.90842	15340	15684	17850		9.60185	17045	17384	18439		9.34015	18015	60713	23181		8.1415	13183	13117	17670
9.91252	16316	15620	18627		9.60592	16609	16824	17436		9.34427	19570	43787	21299		8.14558	13981	12819	17796
9.91658	16155	15874	19084		9.61003	16309	16659	18734		9.35892	19064	33664	22527		8.14965	14205	12787	18892
9.92068	15975	16008	18809		9.62468	16195	18037	17330		9.37353	18866	27406	21357		8.15375	13886	13108	18989
9.92477	16341	16092	17999		9.6288	15965	16742	18093		9.37767	21019	20947	20705		8.15782	14148	13824	19479
9.9289	15749	16185	17908		9.63287	15679	17572	18055		9.38177	21308	22778	21422		8.1619	13891	13578	18014
9.933	16297	16545	19343		9.63698	16401	17008	18095		9.38583	24092	21280	19742		8.16598	14214	12698	17032
9.94763	16295	16317	20935		9.64103	14562	16040	18425		9.38995	28529	19207	19964		8.17007	13820	12408	17457
9.95173	15999	15219	26698		9.64515	15433	16701	17998		9.39403	34558	17841	20768		8.1847	14115	13499	16359
9.95582	16048	16323	48228		9.64923	16089	16875	18136		9.4087	69071	17514	19168		8.1888	13661	12952	16482
9.95992	16457	16105	86291		9.65335	15334	17600	17738		9.42338	83101	19092	18402		8.19287	14242	12429	18349
9.96398	16552	15592	89410		9.65742	15016	16455	17965		9.43822	56805	17868	18119		8.19695	13663	12721	20954
9.96808	16737	16698	115226		9.66152	15735	17261	18003		9.45287	48305	17805	19261		8.20103	13096	13439	44656
9.98268	16324	15776	386037		9.66558	15496	16529	17358		9.46767	36493	17895	17952		8.20513	13816	13724	103923
9.98677	16618	15486	304059		9.66968	14799	16378	17669		9.4825	29122	16289	18487		8.2092	13685	12661	130183
9.99087	16561	16551	557118		9.67377	15240	17012	18036		9.49713	23179	16462	18289		8.2133	13344	12931	98934
9.99497	17042	15260	276546		9.67788	15933	16179	17437		9.5118	19263	16319	17829		8.21738	13100	13935	54940
10.0096	17679	16017	328631		9.68197	15175	15909	17846		9.51592	19688	16051	19160		8.22147	13392	13760	31860
10.0137	17389	16506	214943		9.68607	16380	16323	18151		9.53053	17485	16570	18025		8.22555	13666	12893	19833
10.0177	17008	15229	107581		9.69015	15735	15180	18170		9.53463	18001	15907	16997		8.22965	13220	13877	18996
10.0219	17319	16657	50015		9.69427	15690	15516	17868		9.53872	18614	15819	17558		8.23373	13510	13165	18305
10.0259	16788	16273	27361		9.69833	15636	16174	17622		9.55335	18890	15890	18996		8.23782	13266	13412	17774
10.0301	16547	15798	35534		9.70245	15707	15190	17763		9.55745	17743	15742	17969		8.24188	14537	13451	16949
10.0341	15797	16105	32874		9.70652	16445	15580	17077		9.56153	17411	15394	16915		8.24598	13916	13643	17099
10.0488	16006	16063	29654		9.71063	16300	15113	17655		9.57618	19230	15496	17343		8.25005	14266	13238	18800
10.0529	16530	16052	30154		9.71468	15308	15104	17250		9.59085	17097	15696	16814		8.25413	13921	13158	17715
10.0569	15303	15851	26297		9.71878	15611	15704	18667		9.59495	17907	14964	18203		8.25822	14647	13901	16513
10.061	15393	16082	25281		9.72287	15330	15067	18606		9.60957	15566	15774	16631		8.2623	14609	13293	17502
10.0651	15646	15836	24579		9.72698	16134	15018	18386		9.61367	15930	15902	17489		8.26637	14823	13984	17366
10.0692	15746	16070	23841		9.73105	15809	16483	18359		9.61773	16403	15474	17306		8.27048	15054	14064	17600
10.0733	15771	15711	24025		9.73517	16146	15212	17197		9.62183	16317	15611	17245		8.27457	16573	12997	17598
10.0879	16560	15111	22277		9.73925	16006	16684	18073		9.63645	16328	16086	17005		8.28922	18624	14088	17261
10.092	15818	15760	24240		9.74335	15390	15837	17951		9.65108	15341	16423	17479		8.30388	21648	13552	16512
10.0961	16443	16507	21617		9.74742	15803	16493	18873		9.65518	15252	16009	17163		8.308	23453	14190	17446
10.1002	16689	16589	22304		9.75153	15585	16281	19003		9.65927	15158	17030	17091		8.32273	18966	14213	17656
10.1043	17265	17209	21535		9.75562	16654	16398	19685		9.66338	15008	16692	17933		8.32683	17931	13129	16742
10.1083	20338	16328	21883		9.75973	16209	16207	19648		9.66743	15235	17192	18200		8.33092	17545	13542	17762
10.123	25514	17225	21989		9.76382	15732	16193	18683		9.67153	15474	17613	18691		8.33505	16453	13436	16786
10.1377	31010	16605	21618		9.76792	15629	15501	19579		9.67562	14930	17221	19810		8.33915	16495	13179	18086
10.1525	27197	17329	20471		9.77197	16661	15792	19698		9.6797	14891	17063	21222		8.35375	15792	13767	17282
10.1672	22204	16827	21064		9.77607	15838	16647	20047		9.68378	15493	16873	24101		8.35785	14836	13636	17324
10.1819	17311	16934	20880		9.78015	15140	16376	18658		9.6879	15024	17051	40816		8.36192	14976	12787	16795
10.186	16789	16801	21409		9.78427	14941	16465	19991		9.69197	15322	16656	56678		8.36603	14650	13759	17305
10.1901	17282	16210	20157		9.78833	14962	15414	19291		9.69605	15159	16361	99130		8.37008	14766	13520	17769
10.1942	16463	16583	21197		9.79243	15149	15683	19224		9.7001	15310	16643	83373		8.37417	14513	12760	17878
10.1983	16649	16192	20099		9.79652	15871	16351	18752		9.7042	15368	16164	130153		8.37825	14320	13045	18685
10.2024	17120	16752	19996		9.80065	14671	15570	19800		9.70827	15892	16195	381574		8.38235	14078	13330	17764
10.2065	16239	15654	20127		9.80475	15549	16207	18661		9.71237	16897	16252	326877		8.38643	14009	12479	18097
10.2211	17448	16435	20749		9.8088	15468	15954	17756		9.727	16969	15166	621696		8.39055	14583	13424	18279
10.2357	16302	16109	49830		9.8129	15385	15686	17901		9.7311	16820	15805	356781		8.39462	14398	13180	18130
10.2398	16371	16354	237110		9.81697	15595	15985	18023		9.73517	18061	15066	297068		8.3987	14353	13174	17897
10.2545	16742	16229	301824		9.82108	15240	17045	17952		9.7498	17186	15172	254578		8.40278	13646	13132	17209
10.2586	16494	16701	594251		9.82515	16116	15467	17925		9.76447	16675	15639	113644		8.40688	13823	13568	16083
10.2626	16247	15754	200565		9.82925	16046	15994	17840		9.76857	17058	15107	39347		8.41095	13970	13729	17351
10.2668	16938	15569	135480		9.83332	16308	15748	17403		9.77263	16383	14953	35876		8.41503	14799	13849	15920
10.2708	16599	15618	47344		9.83743	15664	16177	18739		9.77673	16056	15039	44595		8.41912	14652	13604	16473
10.2749	17060	15980	21634		9.84152	16221	17048	19295		9.7808	17036	16049	60875		8.4232	13950	13723	15996
10.279	16991	16046	22276		9.8456	15979	16867	20961		9.7849	15683	15748	83142		8.42728	14328	13141	16677
10.2831	16850	16888	42191		9.84967	15941	16009	20236		9.78895	16983	14797	72052		8.43138	14454	13081	16475
10.2872	17074	16362	56332		9.85375	15603	16264	22397		9.8036	14995	14801	57273		8.43545	14429	13770	17631
10.2913	16684	17929	127856		9.85782	15069	17638	19777		9.8077	15547	15222	39189		8.43953	13877	13634	17714
10.3059	17321	19258	93582		9.86192	15847	16826	19807		9.81177	15386	14451	29345		8.44362	13765	13552	17689
10.3205	16950	19860	130209		9.866	15572	17157	19884		9.81585	15271	15376	25860		8.44772	13635	13192	17932
10.3246	16660	28216	94338		9.8701	16109	16642	19903		9.81992	15264	15498	23905		8.45178	13902	13768	17195
10.3287	17211	26101	67095		9.87417	14882	16918	20518		9.824	15818	15296	23487		8.45585	14131	13802	18041
10.3433	16545	20999	50007		9.87828	15019	17450	18845		9.82807	15494	15324	21762		8.45995	14127	12600	18263
10.358	18131	17767	41686		9.88235	15279	16326	19455		9.83215	14813	15690	22863		8.46405	14842	13095	17611
10.3727	16192	17543	37683		9.88645	16097	17211	19659		9.8362	15334	15766	21478		8.46812	14934	12934	17778
10.3768	16086	16894	34446		9.89052	15914	16418	19919		9.84032	15879	15640	22260		8.47222	13760	13157	18800
10.3809	16664	16849	33405		9.89462	15351	16671	18767		9.8549	14975	14683	20746		8.47628	13276	13395	18371
10.385	17912	16443	32691		9.8987	15449	16019	19697		9.859	15513	14827	21183		8.48037	14027	13417	17691
10.3996	18138	16245	32572		9.9028	15138	16308	18827		9.86308	16102	15675	31536		8.48442	14279	12990	16795
10.4037	17882	16027	32889		9.90688	16707	16141	19974		9.86718	15622	15204	123201		8.4885	14484	13108	16932
10.4078	18607	16837	31423		9.91098	15675	15597	19152		9.87125	15897	14714	222046		8.49257	13871	13407	17520
10.4224	18117	17307	30898		9.91507	15818	16691	20065		9.87535	16625	14926	312893		8.49665	13409	12916	16882
10.437	17646	16721	30021		9.91918	14983	16072	18635		9.87942	15189	14564	117604		8.50072	14414	13047	16673
10.4412	18116	17332	31916		9.92325	15431	15351	18579		9.88348	15689	14654	64756		8.50482	13814	13858	17920
10.4452	17919	16641	30734		9.92737	15682	16356	19227		9.88758	15797	14979	25936		8.50888	13902	12922	17109
10.4599	18205	16827	30406		9.93145	15029	15892	18665		9.89167	14592	13817	17801		8.513	13536	13217	16879
10.464	17875	15667	29255		9.93555	14936	15574	17662		9.89575	15191	15433	23901		8.51705	14302	13595	16987
10.4681	18544	16538	28397		9.93963	16161	15711	18659		9.89985	15613	14455	23978		8.52115	13720	13205	16996
10.4827	18786	16098	29603		9.94375	15738	16383	18661		9.90392	16171	14513	43669		8.52523	14503	13522	17116
10.4869	18694	16685	27198		9.94782	16850	16767	18379		9.90802	15027	14682	98891		8.52932	14411	13796	16661
10.5014	19211	16092	28789		9.95193	15395	17182	17903		9.91208	15649	15156	178092		8.53338	14297	13830	16760
10.5161	18588	16180	29475		9.95602	16262	16018	18081		9.91618	15435	15005	77406		8.53747	14196	14133	15972
10.5202	19116	15845	29741		9.96013	15304	16672	17486		9.92023	15581	15047	81512		8.54153	14585	13578	16494
10.5243	19933	16863	31214		9.9642	16495	17024	17325		9.92432	14727	15351	62673		8.54565	14305	13599	16502
10.5389	17702	16660	34462		9.96832	16358	16562	18001		9.92838	15593	15110	46527		8.5497	14279	13161	16791
10.543	19028	16202	36731		9.97238	16497	16156	18420		9.93247	16300	15208	30987		8.5538	13828	13248	17022
10.5471	19562	16468	38267		9.97648	17108	16368	17079		9.93652	15725	15208	28485		8.55787	14386	13248	16378
10.5512	18257	16746	34811		9.98057	17232	16474	17393		9.94063	15551	15165	24946		8.56195	13960	12956	15524
10.5553	19297	16133	28661		9.99522	17134	16492	17223		9.9447	15851	15234	24107		8.56602	13689	13471	15823
10.5699	19449	17027	29267		9.99932	17176	17416	18441		9.9488	16061	15287	22640		8.5701	14706	13281	17064
10.574	19117	16632	28639		10.0034	17428	17521	17990		9.95288	15956	15582	23062		8.57418	13642	12890	16716
10.5781	20350	16547	29135		10.018	17572	17709	17654		9.95698	16021	15511	21265		8.57828	14128	13473	17116
10.5927	20712	16214	31565		10.0327	18063	17919	18254		9.96105	16130	15849	21218		8.58235	13809	13418	17104
10.5968	20386	16594	37631		10.0368	17199	17125	18364		9.96513	15248	16516	21494		8.58645	13917	13809	16365
10.6009	20294	17347	36495		10.0409	16623	18802	17547		9.9692	15778	15471	20180		8.59055	14140	13205	15727
10.605	20862	16843	45430		10.0555	17701	17300	17423		9.9733	16380	15198	21158		8.59463	14223	13483	17237
10.6091	20091	16479	49819		10.0702	16149	17262	17626		9.97735	15355	15334	22883		8.59872	14259	13542	16908
10.6132	20462	16068	37019		10.0743	16324	16644	18860		9.98145	15785	15195	23309		8.60282	13599	13265	17433
10.6173	20657	17000	28866		10.0783	16032	16429	18102		9.98552	15974	16139	26564		8.6069	13978	12801	18927
10.6214	20543	16622	27187		10.0825	15079	17151	17768		9.98962	14997	15696	31886		8.61098	13654	13064	18499
10.6255	20311	16148	26711		10.0866	16569	17599	17821		9.9937	15652	16184	30438		8.61505	13934	13429	17666
10.6296	20325	16432	25639		10.0907	15891	16639	18730		9.9978	15519	15494	28364		8.61915	13625	13065	18470
10.6336	21453	16264	26078		10.0947	16453	16838	18374		10.0018	15443	14756	27207		8.6232	13434	12753	18537
10.6377	19974	17109	25449		10.0988	16706	16369	16922		10.006	16087	15616	28043		8.62728	12859	13031	17426
10.6418	20829	17031	27859		10.1029	16472	15877	17139		10.01	15141	15579	35177		8.63137	14222	13581	16761
10.6459	21942	17365	26420		10.107	16680	16319	18571		10.0141	16032	16223	45438		8.63545	13954	14048	17495
10.6606	20934	15778	30126		10.1111	17752	16199	17329		10.0182	16363	16213	50143		8.63952	13358	13122	15471
10.6646	22092	16555	32037		10.1152	18218	15777	17392		10.0223	16328	16083	40511		8.64362	14155	13334	16017
10.6687	21980	17533	40126		10.1193	19236	15662	18267		10.0264	16463	14828	29627		8.6477	13611	13537	15998
10.6834	21574	16677	56598		10.134	25400	16002	18324		10.0305	16070	15578	25370		8.65178	14254	13515	16788
10.6875	21904	17440	92416		10.1486	27876	16781	18571		10.0345	16582	16477	23754		8.65587	14080	13910	16404
10.6916	21113	18120	134850		10.1633	23248	15893	17635		10.0386	15516	15390	25376		8.65997	13966	13739	16595
10.7062	21993	16940	176582		10.1781	19641	16734	18081		10.0427	16904	15369	26780		8.66403	14163	13424	15661
10.7103	21259	17166	87008		10.1928	17166	18536	17269		10.0468	15914	15134	28861		8.6681	14198	14234	16232
10.7144	21570	16224	70889		10.1968	15772	19308	17296		10.0509	16230	15289	43931		8.67222	14655	14169	15983
10.7185	22076	17376	52552		10.201	16680	19747	16914		10.055	15626	15433	60836		8.68687	13802	13895	16118
10.7226	21624	16923	55221		10.205	16132	24219	17433		10.059	16540	15936	99494		8.69097	14386	13451	16087
10.7267	21957	17827	43050		10.2091	15599	26827	16728		10.0631	16793	15779	180813		8.69505	14146	13564	15919
10.7308	21369	16648	36666		10.2132	16846	23017	16690		10.0672	16103	15198	152496		8.69913	14169	13534	15192
10.7349	20511	17932	35905		10.2173	15978	19353	17004		10.0713	16389	15532	91073		8.70318	14123	13498	16109
10.739	21447	16564	34028		10.2214	15236	17338	17985		10.0754	16042	15537	60658		8.70728	14715	13121	15814
10.7431	22251	17535	30639		10.2255	16358	17078	16771		10.0795	16368	15568	52337		8.71135	15598	13382	17081
10.7472	21707	17357	28066		10.2296	16384	16647	16842		10.0835	16869	15347	42829		8.71545	14463	13347	15689
10.7619	22132	17494	27462		10.2337	16990	17019	17100		10.0876	16348	15843	34926		8.7195	15377	13283	16625
10.766	22093	17505	25213		10.2378	15869	16648	17465		10.0917	16082	16230	27710		8.72362	16158	13107	16526
10.77	21182	17773	24757		10.2419	16533	16042	17256		10.0958	16260	15546	27144		8.73833	17464	14380	16481
10.7742	21580	18030	26017		10.246	15408	16649	17536		10.0998	15212	16062	25056		8.74245	18303	13409	15785
10.7782	22188	17525	24792		10.2501	16179	15805	17139		10.104	15848	16964	23701		8.74653	18636	12854	16023
10.793	20778	17120	23791		10.2542	16178	16023	16924		10.108	16648	19714	22447		8.7613	19386	13663	16388
10.7971	21025	17964	24181		10.2583	15788	16307	16979		10.1121	16497	24212	23820		8.77607	17000	13055	16637
10.8012	20916	17936	24283		10.2624	16343	16685	17077		10.1162	16556	27522	24315		8.7907	16015	13242	16664
10.8053	20157	17710	23656		10.2665	15871	15647	18308		10.1203	17201	26587	22285		8.7948	14882	13077	15628
10.8094	19907	17975	23522		10.2706	16483	15730	20108		10.1244	17126	20947	22896		8.79888	14957	13849	16342
10.8135	20501	17963	23903		10.2747	16862	15988	25084		10.1285	18485	18240	22020		8.80298	15255	13501	16487
10.8176	19864	17469	23302		10.2788	16430	16668	28351		10.1326	19711	16374	23168		8.80707	15294	13451	16277
10.8217	20065	17195	26528		10.2829	16453	16769	42477		10.1366	19580	17498	23778		8.81115	14758	14285	16077
10.8258	19688	17746	27831		10.287	15621	16618	45180		10.1512	30416	16405	24816		8.81523	14391	14326	16573
10.8299	19987	17469	26985		10.2911	17283	16937	46424		10.166	34986	16839	25598		8.81932	14035	14697	17061
10.8339	19128	18001	34505		10.2952	16803	16584	171351		10.1809	28984	15859	26002		8.8234	14034	14901	15942
10.838	19500	17869	39292		10.3099	15844	16058	160743		10.1956	22299	17823	31722		8.82748	14754	17753	16424
10.8422	18834	17691	33482		10.3245	16572	16075	480812		10.2103	19193	17826	37960		8.83153	13782	20854	16552
10.8462	18565	18074	28506		10.3286	16918	15816	229193		10.2249	17650	17602	40044		8.83563	14247	20029	17193
10.8503	19230	17735	28097		10.3327	16757	17203	229693		10.229	19264	16963	30635		8.8397	13933	17841	17672
10.8544	19078	17997	30365		10.3368	15876	17131	154762		10.2436	19084	17139	25740		8.84378	14346	16370	17432
10.8585	19294	18823	29942		10.3409	17470	16364	77333		10.2477	18333	19144	25567		8.84783	15379	15656	19139
10.8626	18422	18512	27769		10.345	16427	17196	39340		10.2518	19744	19427	24709		8.85192	14068	15052	18689
10.8667	19520	18418	27574		10.349	16765	16105	26318		10.2665	20925	18640	28721		8.85597	14261	14426	17168
10.8708	19361	18871	25722		10.3531	16454	16720	24434		10.2811	21160	20083	29708		8.86013	14650	14052	16331
10.8749	18545	18561	27547		10.3572	16435	17065	21050		10.2957	19306	19278	27337		8.86425	14448	14828	16714
10.879	18560	18490	26325		10.3613	16799	16087	21964		10.2998	20619	16886	26237		8.86832	15398	13824	16450
10.883	18600	17777	27068		10.3759	16492	15798	21962		10.3039	20974	17861	26200		8.87242	15104	14065	16460
10.8871	17399	18691	26984		10.38	16449	16723	21262		10.3186	19288	17782	26648		8.87647	15266	13640	16406
10.8912	18551	18454	28726		10.3841	16478	16034	22189		10.3226	18987	16967	28548		8.89123	16656	13250	16520
10.8953	18606	19190	29545		10.3882	16156	16829	21530		10.3267	19167	17488	32712		8.89535	18071	12787	17206
10.8994	18283	19737	29728		10.3923	16445	16485	21804		10.3309	18494	17402	49436		8.90997	17986	13702	16225
10.9035	18621	18581	43442		10.3964	16996	17061	22045		10.3349	18668	17247	100783		8.9246	16874	14042	15697
10.9076	19439	20018	72679		10.411	16051	16969	22736		10.339	18187	16324	111285		8.92872	16157	13723	15952
10.9117	17517	19205	108348		10.4151	17029	16305	22086		10.3431	18618	15724	81474		8.93282	16105	13547	16225
10.9158	18815	19418	83439		10.4192	16204	16478	22221		10.3472	17275	16805	53517		8.9369	15443	13559	15931
10.9304	18067	19461	52794		10.4233	16527	16320	22281		10.3513	18141	17910	46120		8.94098	15019	13685	16556
10.9345	17355	18636	36831		10.4274	16612	16642	21489		10.3554	18847	16229	46949		8.9451	14608	13721	17178
10.9386	17660	19250	42632		10.4315	15065	16761	22550		10.3596	17909	16086	59883		8.94917	15073	13391	17273
10.9427	17279	19291	49911		10.4356	16169	15869	24109		10.3636	17655	16455	68715		8.95328	14764	13672	18323
10.9573	18153	18542	64297		10.4397	15888	15681	22494		10.3677	17891	17068	49504		8.95735	13107	13917	17866
10.9615	18407	19578	69539		10.4438	16192	16462	21883		10.3719	17785	16729	50001		8.96145	15030	13581	18885
10.9656	18379	18659	51884		10.4479	16128	15694	22289		10.3759	17484	16849	45146		8.96555	14987	14060	18851
10.9802	17429	20226	38944		10.4522	15594	16236	22229		10.3801	17755	16880	43348		8.96965	14621	13249	17664
10.9843	17527	19519	37262		10.4563	15454	16819	22617		10.3841	18167	17377	33531		8.97372	14944	13926	18729
10.9883	16735	19553	31486		10.4604	16209	16242	24855		10.3988	19172	16911	46799		8.97783	14912	13713	16788
10.9924	16080	19566	35436		10.4645	16607	15375	27654		10.4029	19858	17683	328031		8.98192	14289	14063	17579
10.9965	16179	20281	137086		10.4687	16763	16758	69397		10.407	19881	16857	1178003		8.98602	14788	13331	18221
11.0006	17094	19848	514707		10.4727	17491	16627	211387		10.4111	20616	17175	2038804		8.9901	14020	13790	17726
11.0047	16601	20750	789600		10.4874	16296	15796	150222		10.4257	21195	18223	3185682		8.9942	14557	13353	17299
11.0088	17266	19975	1271992		10.4915	16942	15847	154774		10.4404	21449	17478	2453913		8.99828	14683	13114	16990
11.0128	16455	20392	440265		10.4956	17982	15697	75976		10.4552	18635	18363	1565977		9.00238	13922	13984	17533
11.0169	17042	19446	315723		10.5102	16494	15942	33519		10.4593	19605	17466	543544		9.00645	14614	13906	17535
11.021	16283	20316	160057		10.5143	16435	15293	25442		10.4739	18491	19096	164661		9.01057	14549	14245	17105
11.0251	16252	20370	49089		10.5184	16470	16761	24398		10.478	20487	18508	58571		9.01462	14095	13099	16047
11.0292	16470	20409	36998		10.5225	16690	16265	28012		10.4926	20514	20355	40294		9.01872	13818	12791	16710
11.0333	16466	21261	41214		10.5266	16498	15802	34589		10.5074	22523	20620	39263		9.0228	13649	13079	16138
11.0374	16838	20174	41234		10.5307	16521	16859	61808		10.522	24960	21693	51704		9.02688	14530	14102	16987
11.0415	16066	20720	41115		10.5348	16788	17194	93575		10.5368	27130	20624	68538		9.03097	13787	13809	17965
11.0456	17014	20384	40842		10.5389	16337	15372	97166		10.5516	23135	20553	73531		9.03505	15148	13857	16919
11.0497	17021	20566	42488		10.5429	16126	17374	66230		10.5557	23241	20946	64529		9.0391	13876	14149	15739
11.0538	17158	19849	40024		10.547	16261	15823	42391		10.5598	23339	20187	58282		9.0432	14094	13946	16678
11.0579	16825	19336	38735		10.5511	16251	15894	28144		10.5639	22811	19891	61904		9.04728	14093	13673	17593
11.0619	16239	19492	38833		10.5552	15693	17340	25686		10.5786	22141	19074	42931		9.05138	14041	13631	16273
11.066	16435	19993	32989		10.5593	16372	16577	25287		10.5827	21854	19284	41018		9.05547	14248	13532	16588
11.0701	16657	19988	28382		10.5634	16883	16757	25200		10.5868	21131	18849	31964		9.05955	14142	13718	16696
11.0742	16633	18961	29181		10.5675	16300	17451	25225		10.5909	21751	18883	29997		9.06362	14331	13720	15543
11.0783	16437	18459	31891		10.5716	16480	17521	22374		10.6056	21438	18658	61756		9.07823	14464	13158	15772
11.0824	16719	19419	31885		10.5757	15857	16539	20156		10.6204	21055	19316	241905		9.08233	14129	13741	16264
11.0864	16372	19355	96335		10.5798	17008	16673	23335		10.6245	22254	19266	194666		9.0864	14272	13358	15759
11.0906	16776	19182	257381		10.5839	16522	16262	21849		10.6286	21299	20136	238630		9.0905	14210	13362	15655
11.0946	16694	18685	199717		10.588	17136	15664	21708		10.6433	21006	20143	106156		9.09458	14791	14363	15436
11.0987	15886	18634	253895		10.5921	16422	16441	20783		10.6474	21176	19723	38929		9.09867	14431	13230	15507
11.1028	16564	17692	130760		10.5962	16638	16866	21123		10.6515	20281	20377	25091		9.10273	13514	13162	15990
11.1069	16411	18795	45411		10.6108	17963	17084	20493		10.6556	19934	19797	33646		9.10683	13474	13497	15997
11.111	16041	18220	24871		10.615	16837	16618	21188		10.6597	20815	18334	37756		9.11092	14634	13553	16205
11.1151	15954	18559	30753		10.619	16666	17154	21101		10.6638	20433	20017	45292		9.11502	14332	13367	15504
11.1192	15588	17666	50035		10.6232	17391	17033	20435		10.6679	20857	19028	47433		9.11908	14356	14140	15872
11.1233	15939	17730	60205		10.6378	17823	17726	20904		10.672	18731	18518	53596		9.12317	14446	14076	15174
11.1274	17306	18104	76744		10.6419	17680	15877	21234		10.6761	19338	18830	45790		9.12725	14346	12960	15643
11.1315	16167	18467	87859		10.646	17916	17419	21842		10.6802	18990	19222	41496		9.13133	13908	13511	16208
11.1356	16982	19108	100345		10.6607	17761	15632	22741		10.6843	19287	18692	35336		9.1354	14436	13749	14928
11.1397	15782	18321	106639		10.6648	17765	17016	23026		10.6884	20373	20360	31032		9.13948	13930	13774	15597
11.1437	18104	18207	105000		10.6689	18988	17602	26367		10.6925	19872	20347	29218		9.14355	14050	14482	15348
11.1584	17017	17934	97024		10.6836	17997	17283	25006		10.6966	19924	19673	28414		9.14767	14020	13973	15950
11.1625	16846	18243	100312		10.6877	17801	17462	26571		10.7112	19703	19450	27182		9.15173	13744	13531	16365
11.1666	16578	17781	90657		10.6918	18886	17111	24232		10.7258	19700	20448	26120		9.15582	14757	14212	15455
11.1812	16815	17655	83659		10.6959	18002	18352	23408		10.73	19617	22480	26601		9.1599	13903	14234	15529
11.1853	18411	18217	85733		10.7	18296	18066	23515		10.7446	19139	21620	26240		9.16398	14106	14251	15838
11.1999	20377	17711	88259		10.7147	18951	18176	23391		10.7592	20300	21705	25055		9.16805	14172	13589	16137
11.2041	27874	17496	73754		10.7188	17415	18633	23782		10.7633	20133	22299	28017		9.17215	14157	13907	15170
11.2187	58885	17949	66495		10.7229	18599	19571	23996		10.7674	19763	22433	35409		9.17622	13847	13143	15062
11.2335	126443	17660	63545		10.727	17989	18566	24866		10.7715	19364	21185	45951		9.1803	14521	13998	15326
11.2483	56890	17267	50630		10.7311	18477	18982	28262		10.7756	19698	20726	47440		9.18435	14499	13848	15421
11.2629	49143	17591	46876		10.7457	18149	19306	28875		10.7797	20178	20801	32826		9.18847	13868	13697	16368
11.2775	33479	17624	43822		10.7499	18217	18701	27742		10.7838	20405	20701	28342		9.19253	13905	13807	14984
11.2921	23213	18024	40247		10.7539	17556	18064	32620		10.7879	21693	19711	27535		9.19663	14560	13654	15191
11.3068	17959	17445	35134		10.7581	17860	19337	28322		10.8025	20177	20017	30042		9.20068	13989	13049	15669
11.3109	17041	17776	36257		10.7622	18583	19425	24704		10.8066	18973	18952	29830		9.20477	14251	13368	14644
11.3149	16634	17360	35997		10.7662	18625	18891	23056		10.8107	19642	19318	30480		9.20885	14443	14386	15084
11.319	18366	17238	34473		10.7704	17724	18630	22759		10.8148	19318	18595	32844		9.21295	13791	13930	14450
11.3336	16423	17601	32613		10.7745	19017	18670	23644		10.8189	18817	18829	32289		9.21702	14272	14312	14677
11.3377	16245	16554	33523		10.7891	18294	20020	23756		10.823	19676	18721	34945		9.2211	14965	13733	15013
11.3418	15464	17449	32029		10.7932	16908	19977	23916		10.8271	18458	18168	34353		9.22518	14798	13240	15215
11.3459	16162	16975	38395		10.7973	17485	19568	26353		10.8312	18506	18816	36488		9.22928	15889	13554	15413
11.35	16217	17403	32149		10.8014	17989	18229	30464		10.8353	17941	18510	34626		9.23337	14873	14041	14469
11.3541	16296	17370	30501		10.8055	18106	18848	39278		10.8393	17460	18367	36005		9.23747	16199	13874	15013
11.3582	16566	17733	31944		10.8096	17483	19242	50509		10.8435	18127	18655	37368		9.24155	16119	14073	14979
11.3623	16484	17626	30809		10.8137	18504	18416	76165		10.8476	18563	18975	33517		9.25615	16629	13624	15136
11.3663	16951	17108	32085		10.8178	18391	18149	81751		10.8516	17860	18179	34168		9.26027	16642	14104	15031
11.3704	16353	16145	31617		10.8219	17843	18789	54656		10.8557	17377	18535	32495		9.26432	14989	14698	15640
11.3745	16002	16309	31153		10.8366	17721	18665	48427		10.8598	18127	18909	33717		9.27892	14534	14730	15019
11.3786	15428	17934	31287		10.8407	17741	18470	44093		10.8639	17307	19738	29393		9.28303	14716	14772	14890
11.3827	16527	16918	31091		10.8447	18166	19644	37998		10.868	17026	18776	30638		9.2871	14432	16512	15473
11.3868	15110	16349	33552		10.8489	17447	18519	36456		10.8721	17830	19709	30221		9.2912	14113	16714	15335
11.3909	15884	16920	35266		10.853	17682	17872	33674		10.8762	16776	18678	30532		9.29525	13413	16687	15439
11.3949	16616	16264	32531		10.857	17750	18185	29398		10.8803	17413	19631	29208		9.29935	14836	15501	14742
11.399	15911	18164	32768		10.8612	19016	18685	29696		10.8843	17674	19785	27885		9.30343	13665	15217	15810
11.4031	16004	16752	32398		10.8652	17504	19331	25906		10.8884	17427	18770	27945		9.30752	14385	15248	14794
11.4072	15703	16680	31557		10.8694	17346	17835	25325		10.8925	17653	18939	28972		9.31158	13593	13553	16124
11.4113	16222	17565	32223		10.8734	19127	18566	26027		10.8966	17490	19018	29224		9.31568	15366	14291	15362
11.4153	15482	17011	31722		10.8775	17865	18297	25677		10.9007	17620	19058	31442		9.31975	14154	13964	16909
11.4194	15741	15953	30744		10.8816	18844	17601	24686		10.9048	16586	19363	31152		9.32383	14309	13349	19495
11.4235	15875	16552	33684		10.8857	18088	17827	23464		10.9194	17762	18771	49935		9.3279	15120	13729	31783
11.4276	15745	16801	34325		10.8898	18828	17407	22682		10.9235	17468	19192	201028		9.332	13928	13364	41344
11.4316	16036	16301	34994		10.8939	18805	18756	21827		10.9276	17381	18075	369711		9.33607	14670	14272	44819
11.4357	16629	16418	42038		10.898	18722	18850	23135		10.9317	17952	18454	437610		9.34017	14590	14170	61979
11.4398	15934	16911	93963		10.9022	19190	18448	22101		10.9358	18642	19064	537804		9.34425	14417	13996	212609
11.4439	15830	16476	209976		10.9062	18690	18475	21891		10.9399	18572	18480	353399		9.34833	13191	13984	159872
11.4479	15534	16255	200371		10.9103	18152	19126	22690		10.9439	18749	18060	173771		9.35242	14724	13588	404515
11.452	15696	16253	188766		10.9144	18738	17533	22087		10.9481	19353	18542	70548		9.3565	14588	14089	237280
11.4561	16705	15410	128251		10.9185	19529	18671	21283		10.9627	18551	18053	27202		9.36058	14567	14125	247907
11.4602	15993	16303	62516		10.9226	19357	18171	21106		10.9668	18456	18759	23974		9.36467	14224	13412	146138
11.4642	14865	16579	32874		10.9267	17938	19839	20636		10.9709	18585	18589	34514		9.37925	13939	13694	71426
11.4683	15729	15786	33994		10.9308	19030	17188	21577		10.9855	17736	17419	35080		9.38337	14462	14600	35348
11.4724	15296	15973	33843		10.9349	20151	19027	22335		10.9896	18484	17408	38883		9.38742	14740	13589	25029
11.4765	16056	16210	34306		10.939	19892	19410	21204		11.0043	17400	17409	39396		9.39153	14106	14100	22313
11.4806	16336	16129	38176		10.9432	18807	19355	20966		11.0084	16669	16754	85873		9.3956	14621	13634	19182
11.4847	16150	15951	41452		10.9473	19816	19229	20735		11.0125	17472	16703	247581		9.3997	14260	14031	19570
11.4993	16248	16751	48410		10.9514	19353	21031	21507		11.0166	16915	17800	156336		9.40378	14763	13926	18485
11.5034	15199	15615	131492		10.9555	19547	19485	22644		11.0207	17045	16842	303842		9.40787	14051	15019	18699
11.5075	15733	16698	168971		10.9595	19053	19875	21640		11.0247	16006	17119	226468		9.41192	14085	14229	18624
11.5115	15874	16162	303687		10.9636	19033	19741	21670		11.0289	16471	16950	150879		9.41603	13654	14441	18984
11.5156	15415	16892	155880		10.9677	20925	20531	21935		11.0329	16012	17108	74077		9.4201	14960	14664	18916
11.5197	15674	16726	152256		10.9718	19717	19957	22173		11.037	16725	16830	42450		9.4242	14209	14363	19406
11.5237	16193	16770	104638		10.9759	19935	19344	21889		11.0411	17308	16572	46780		9.42828	14205	13914	18232
11.5278	15851	17045	57810		10.9801	19631	19605	22668		11.0452	15811	17427	89972		9.43238	14493	14163	17681
11.5319	16372	17074	40493		10.9842	19989	18767	22107		11.0493	16835	17460	217490		9.43645	13716	14829	17939
11.536	15909	16537	37089		10.9883	19682	19226	20985		11.0534	16810	16541	236538		9.44057	14519	14201	17630
11.5401	16141	16699	45767		10.9924	19731	19773	21266		11.0574	16408	17679	799342		9.44463	14409	14887	18668
11.5547	16282	17548	87026		10.9965	20693	18681	21732		11.0616	16810	17671	781768		9.44873	14258	14817	18043
11.5588	15990	16873	270141		11.0006	19036	18223	22186		11.0656	17085	17723	1102149		9.45282	13719	14920	18913
11.5629	16555	20327	396907		11.0047	20070	18795	22465		11.0697	17924	16819	730671		9.4569	14444	13686	18284
11.5775	16594	25701	954529		11.0088	18952	18031	21802		11.0844	16850	17605	338101		9.46097	14222	14320	17834
11.5816	15715	48990	699423		11.0129	19974	18035	22445		11.0885	16965	16593	120982		9.46505	14726	14214	18779
11.5857	16141	99898	752660		11.017	19876	18644	22936		11.0925	16110	16730	40958		9.46913	14729	14921	17909
11.5898	15961	46630	344819		11.0211	20338	18578	24222		11.0967	16841	17016	28345		9.47322	14282	14073	17870
11.5938	15329	44639	127964		11.0252	19645	18643	23976		11.1007	15883	16357	38598		9.47728	15671	14435	18194
11.598	16426	30795	44812		11.0292	20319	18215	25912		11.1048	17097	16463	50456		9.49193	15720	14123	18379
11.6126	14959	21627	28866		11.0334	21081	17999	23216		11.1089	16535	17081	54541		9.49605	15622	14617	18489
11.6166	15766	17132	35806		11.0375	19751	18493	23357		11.113	16449	17048	48828		9.50012	15362	14630	18251
11.6207	15420	16605	49165		11.0416	20284	18617	24608		11.1171	16147	16999	48664		9.51477	15444	14112	17799
11.6248	15064	16586	45708		11.0457	20514	18306	23773		11.1212	15768	16242	46766		9.52942	14993	14084	17862
11.6289	15556	16636	47298		11.0498	20285	18554	23198		11.1252	16256	16736	47906		9.53353	14872	14022	17262
11.633	15010	16552	44141		11.0539	18726	17890	24240		11.1294	16867	17281	49422		9.53762	14742	14784	17711
11.6371	14895	16207	45940		11.058	21218	18514	25179		11.1439	16088	16844	64986		9.54172	15212	14659	17598
11.6411	15620	16599	44398		11.0621	20480	17791	28528		11.148	16029	16615	82749		9.54577	14906	13754	17432
11.6452	15442	16540	45601		11.0662	20604	18642	42771		11.1521	16414	16859	85365		9.54987	14132	14296	16943
11.6493	15724	15288	50282		11.0703	20051	17618	60004		11.1562	16620	16686	72803		9.55395	14929	14354	17016
11.6533	15814	16239	49587		11.0744	20321	17568	68723		11.1603	16793	16907	59020		9.55805	14888	13073	16792
11.6575	16046	16748	56045		11.0785	20024	17990	52956		11.1644	16384	17010	50379		9.56213	15038	13801	17627
11.6615	16353	16876	75790		11.0826	20272	18523	37959		11.1685	16403	17132	53310		9.56623	14775	13845	18113
11.6656	15952	16514	81952		11.0867	19711	17670	31781		11.1726	16650	17648	55246		9.57032	15001	13875	16870
11.6697	15685	16364	80392		11.0908	19948	17376	30564		11.1767	15803	17787	55458		9.5744	14486	14485	17818
11.6738	15444	16603	67664		11.0949	19514	17946	36207		11.1807	16571	18095	56138		9.57847	14043	14235	17258
11.6778	15286	17114	50385		11.099	19921	17904	38965		11.1954	15930	17625	55913		9.58255	14297	14091	17537
11.6819	16245	16028	47506		11.1031	20042	18029	45272		11.1995	15935	19385	57559		9.58663	14579	13909	18757
11.686	16203	16366	48499		11.1072	20519	17773	35033		11.2036	17135	20623	62082		9.59072	14879	14202	18383
11.6901	14690	16533	48113		11.1113	20466	17903	29659		11.2077	17381	18440	59146		9.5948	14398	13145	19207
11.6942	16127	15179	50044		11.1154	20311	17300	29011		11.2118	17656	18120	49370		9.5989	13966	13233	19474
11.6982	15932	15948	50252		11.1195	20037	17084	26731		11.2264	17091	18423	50023		9.60298	15306	14491	17973
11.7023	15135	16110	49559		11.1236	20727	17396	27675		11.2305	17939	17854	51869		9.60708	14435	13921	18576
11.7064	15810	16024	57596		11.1277	19294	17746	29821		11.2346	17663	18036	56931		9.61115	14763	13880	17579
11.7105	15963	15731	50740		11.1318	19988	17006	143188		11.2387	17433	16846	52549		9.61523	13769	13126	16956
11.7146	15681	16105	44858		11.1359	20041	16783	488644		11.2427	18518	16192	55176		9.6193	14361	14484	17516
11.7186	15868	15663	49769		11.14	20036	17782	585171		11.2469	18252	16215	55613		9.62338	14618	13587	17611
11.7227	15902	15940	49892		11.1546	19620	16424	1118861		11.2509	18634	16407	85478		9.62747	14369	14697	17737
11.7268	15987	16182	48140		11.1587	20740	17806	321900		11.2656	17762	16621	116667		9.63157	14459	14412	17865
11.7309	15707	15477	48116		11.1628	20681	17626	220172		11.2697	16916	16299	130795		9.63563	14027	13926	18475
11.735	15273	16127	50519		11.1775	19202	18119	83300		11.2738	17347	16252	109515		9.63973	14345	14160	19292
11.7391	16108	15486	56402		11.1816	20253	18672	32675		11.2779	16761	15959	73112		9.6438	15205	14875	20044
11.7431	15337	16056	64311		11.1857	19597	18117	26397		11.2819	16432	15717	63983		9.64792	14568	14289	21812
11.7472	16779	15572	73796		11.1898	19587	18447	26971		11.286	16336	15970	53063		9.65197	15179	14029	29496
11.7618	15785	15304	110003		11.1939	19283	18171	33733		11.2901	15954	16117	49009		9.65607	14565	14484	52414
11.7659	16410	15585	144402		11.198	20011	18232	30801		11.2942	16262	16179	52786		9.66015	14200	13809	89918
11.77	16765	16413	157145		11.2021	19729	17441	31255		11.2982	16542	16107	54116		9.66427	14506	13268	94739
11.7741	16660	15806	136378		11.2062	19382	18268	31422		11.3023	15818	15434	50466		9.66835	14945	14026	68736
11.7887	16324	16273	97364		11.2103	20061	18083	31291		11.3064	15153	15706	57005		9.67245	14901	13634	46669
11.7928	16412	16253	74495		11.2144	20723	19111	30189		11.3105	16154	15724	50975		9.67652	15113	14582	28658
11.7968	17104	16021	60794		11.2291	20246	16814	30613		11.3146	15351	15873	49276		9.68063	14286	13845	21359
11.801	16920	15601	58390		11.2332	19166	16700	29564		11.3186	16246	16080	50688		9.6847	14121	14015	22208
11.805	16769	15724	61724		11.2373	20376	17051	28609		11.3227	15472	15729	49276		9.6888	13776	14496	21150
11.8198	18137	15673	53773		11.252	19064	16371	28799		11.3268	16064	15470	53870		9.69287	14359	13412	20320
11.8345	16664	15844	52687		11.2561	19225	16205	28793		11.3309	15727	15830	54181		9.69697	14937	13192	19749
11.8385	17400	16190	58857		11.2602	19015	16686	26919		11.335	15702	15919	53221		9.70105	14306	14951	18805
11.8426	17516	16394	53935		11.2643	18318	16297	26072		11.339	15681	15400	54007		9.70513	14348	13590	19361
11.8467	19343	16033	58587		11.2684	17696	17072	25840		11.3431	15250	16249	61026		9.7092	14089	14207	19350
11.8613	18923	16243	50894		11.2725	18291	17106	25799		11.3472	16447	16300	56593		9.7133	14400	13745	19536
11.8761	18920	16100	50937		11.2766	18242	16744	28089		11.3513	15606	15832	67961		9.71738	14248	14012	18237
11.8802	18822	15163	57079		11.2912	17377	16061	28380		11.3553	15823	15972	79075		9.72147	14709	13867	19216
11.8842	19105	16193	53294		11.2953	16874	16623	112334		11.3594	15249	16540	89688		9.72553	14049	14149	18680
11.8989	19412	16192	52996		11.2994	17419	15330	226298		11.3635	15786	15641	92514		9.7296	15241	13728	18016
11.903	19947	15451	58779		11.3035	16720	16166	186562		11.3676	14910	15716	86578		9.73368	14794	13740	18688
11.907	19466	15638	54940		11.3076	17375	15716	235195		11.3717	15171	16012	64507		9.73777	14196	13229	18998
11.9111	20712	16258	51956		11.3117	17903	16194	116138		11.3757	15057	16258	67325		9.74183	14517	13921	17896
11.9152	20835	16157	58631		11.3158	17521	15756	44064		11.3798	14863	16617	65167		9.74592	14723	14395	17969
11.9193	20371	16299	64742		11.3199	16594	15825	29901		11.3839	15866	16044	58322		9.74997	14779	14063	17025
11.9234	22280	16312	71983		11.324	18422	15991	48385		11.388	16891	15373	50143		9.75407	14631	14025	17922
11.938	21566	15920	87803		11.3281	17228	16054	61855		11.4026	16220	14923	55549		9.75815	13882	13708	17857
11.9527	22951	17115	83931		11.3322	16275	16477	67073		11.4067	16548	16167	45612		9.76223	14252	13527	18854
11.9674	25086	16590	72805		11.3363	16862	16799	67344		11.4108	16117	15683	53660		9.76632	14059	14744	18642
11.982	29270	15782	61242		11.3404	16455	16391	62306		11.4148	16770	15781	53425		9.7704	14509	13725	18345
11.9968	27279	15457	54652		11.3445	16702	16475	61593		11.4295	16588	15594	49570		9.77448	14987	13975	18790
12.0009	28841	16195	51370		11.3486	16843	15812	51687		11.4336	15859	15890	47497		9.77858	14792	14460	18174
12.0156	30303	15778	56818		11.3527	16722	15988	43577		11.4376	16342	15685	50560		9.78265	14029	13882	19539
12.0303	31060	15635	52960		11.3567	17136	16315	37474		11.4417	16007	15533	50467		9.78673	15133	12766	18765
12.0344	32234	16146	49821		11.3609	17189	16127	37193		11.4458	16082	16347	46278		9.79082	13846	14292	20064
12.049	33362	16280	51260		11.365	16321	16364	36430		11.4604	16239	16008	53788		9.79492	14481	14318	19710
12.0638	33308	16472	48070		11.369	16677	15746	32386		11.4645	15672	15550	49017		9.79898	14226	14646	20445
12.0679	34738	15806	49475		11.3732	16328	15542	27974		11.4686	15792	15976	52722		9.80308	13955	14210	21295
12.072	34561	15694	49005		11.3773	16642	15610	27504		11.4832	15893	16038	54149		9.80717	14634	14143	23227
12.0867	38918	16474	50445		11.3919	16670	16410	28549		11.4873	16783	16541	55060		9.81127	14232	14567	23563
12.1015	41497	15996	49405		11.396	16616	15866	27300		11.4914	16545	17204	47559		9.81535	14395	14474	22001
12.1162	36724	16529	51308		11.4001	16694	15696	27458		11.4955	15583	16138	50648		9.81942	15169	14362	20959
12.1309	35799	16333	49727		11.4042	16840	16005	27023		11.4995	15363	17130	59677		9.8235	14270	14062	21155
12.1456	35434	16175	45453		11.4083	16180	15803	25970		11.5037	15648	16872	48004		9.82758	14714	14391	20842
12.1604	36749	16162	54419		11.4124	16140	16396	26016		11.5077	15996	16474	53222		9.83165	14935	14443	21478
12.1645	35403	15877	54537		11.4165	16009	15888	25362		11.5118	16627	17335	56375		9.83577	13424	14085	23887
12.1792	77053	15740	54450		11.4206	16372	16078	25855		11.5159	15857	16825	62597		9.83983	14781	14181	24856
12.1941	224467	15467	52467		11.4247	16152	15893	27806		11.5199	16059	16534	49229		9.84392	14420	14058	29412
12.2091	145236	15430	49818		11.4288	17071	15339	26131		11.5346	16670	16874	54701		9.848	14795	14213	28006
12.2241	179769	15179	52058		11.4329	16477	15819	25453		11.5387	16343	17085	45891		9.8521	14344	14192	25861
12.2388	94378	16707	51486		11.4369	16646	15602	25721		11.5427	16888	16061	56226		9.86673	14454	14353	24470
12.2536	39699	16071	53744		11.441	16474	15578	24520		11.5573	16739	16339	50049		9.87083	14218	14279	24199
12.2684	26004	15649	56657		11.4451	16107	15454	26014		11.5614	16840	16767	53323		9.8749	15286	14594	22953
12.283	23871	15644	62093		11.4492	16094	15292	24459		11.5655	17311	16773	57100		9.87898	14819	14933	20990
12.2872	24964	15130	51180		11.4533	15935	16022	24367		11.5696	17379	16741	54652		9.88307	15190	13858	21007
12.2913	23209	16605	56888		11.4574	16096	16303	24175		11.5842	17610	16879	52017		9.8977	14887	14649	20455
12.2954	23027	15505	56519		11.4615	16024	16528	23620		11.5883	16681	17602	53785		9.9018	15124	14850	21847
12.2995	22221	15712	56526		11.4656	15654	15466	24954		11.5924	17725	16427	52838		9.90588	15080	14273	21116
12.3036	23063	15717	53109		11.4697	16986	16653	24891		11.607	16436	16922	58028		9.90998	14341	14887	22141
12.3077	22243	16512	59621		11.4843	16166	15398	26516		11.6111	16098	17059	52689		9.91405	14673	14515	23975
12.3119	20764	15715	63542		11.4884	16888	15752	26506		11.6152	15885	16714	51078		9.91815	14686	14209	25013
12.3265	20845	16270	52348		11.4925	16352	15070	27475		11.6193	17117	16138	55221		9.92223	14935	14047	29613
12.3307	19966	16530	55423		11.4966	16932	14973	26660		11.6234	16351	16447	61247		9.92632	14607	14387	40638
12.3348	19358	16068	51754		11.5007	16466	15894	27019		11.6274	16532	16198	57702		9.9304	14959	14649	67829
12.3389	19489	15764	55596		11.5048	15866	15421	27001		11.6315	16107	15430	60531		9.9345	14360	13999	78739
12.343	19487	17098	57662		11.509	15834	15868	26297		11.6356	15152	16599	56794		9.93857	14643	13452	81954
12.3471	19586	16794	59991		11.513	16488	16005	28577		11.6397	16255	16495	55302		9.94268	14112	13899	50243
12.3513	19641	16115	56160		11.5172	15989	15903	27068		11.6438	16294	15975	57670		9.94675	14401	14026	29850
12.3554	18919	17299	54431		11.5213	16859	15416	28190		11.6479	15805	15893	48393		9.95083	14796	14388	28854
12.3595	19317	15198	52930		11.5254	16175	15697	28021		11.652	16763	15825	57348		9.9549	14071	13665	22982
12.3636	20543	16582	55235		11.5294	15752	16068	28547		11.656	16368	15935	61416		9.959	14214	13880	20769
12.3677	19808	16245	58760		11.5335	15788	15970	26794		11.6601	15827	15378	54008		9.96307	14162	13972	19430
12.3719	20277	16454	57953		11.5376	16326	15651	26934		11.6642	16820	15160	52887		9.96718	15007	14382	19886
12.3759	19037	15611	57605		11.5417	17199	16085	27670		11.6683	16730	15967	58851		9.97125	14629	14032	18172
12.3801	18809	16809	56197		11.5458	15806	15410	27358		11.6723	15104	15433	59566		9.97533	14927	14348	19681
12.3842	18843	15918	51714		11.5499	16740	15420	27985		11.6765	16476	15258	64347		9.9794	14974	13932	19635
12.3883	18606	16603	52843		11.554	16177	15425	27765		11.6805	15364	15518	57922		9.98348	15089	14518	18941
[truncated: 2,148 more rows]

## Sheet: Figure S2
	Acetic acid			Propionic acid			Isobutyric acid			Butyric acid			Isovaleric acid			Valeric acid
0 h	0	0	0	0.094327	0	0	0	0	0	0.096298	0.080751	0.076928	0.01575	0.014073	0.013777	0.022749	0.020637	0.020392
3 h	0	0	0	0.154325	0.136303	0.169978	0	0	0	0.21295	0.192286	0.244707	0.018217	0.017285	0.020093	0.022111	0.021209	0.023498
6 h	0.532943	0.544099	0.64371	0.180146	0.178937	0.190451	0	0	0	0.334938	0.34013	0.342204	0.019983	0.020813	0.020912	0.024456	0.024805	0.028958
9 h	2.03712	1.55511	2.42918	0.59347	0.632477	0.571974	0	0	0.017497	0.610446	0.649584	0.798683	0.023726	0.024238	0.02869	0.027625	0.028549	0.030702
12 h	3.05997	3.37484	3.72243	1.49018	1.53578	0.969009	0.023578	0.019335	0	1.71096	1.38761	0.924224	0.0454	0.035635	0.030114	0.169341	0.09933	0.034907
24 h	1.26387	1.28904	1.26387	0.540403	0.630029	0.234574	0.0139368	0.09272	0.032265	10.3304	10.5783	2.58307	0.279005	0.237053	0.052914	2.01066	2.09565	0.482565
0 h	0	0	0	0	0	0	0	0	0	0.07637	0.084043	0.090092	0.013343	0.014457	0.015115	0.019704	0.021082	0.021851
3 h	0	0	0	0.134459	0.147805	0.148129	0	0	0	0.178478	0.203402	0.205061	0.017351	0.01833	0.01838	0.021439	0.022551	0.022029
6 h	0.522752	0.490376	0.497626	0.186951	0.17375	0.162694	0	0	0	0.369065	0.332032	0.28457	0.023227	0.020704	0.018208	0.028201	0.025263	0.022586
9 h	2.39983	2.56638	3.21452	0.633748	0.678619	0.762911	0	0	0	0.723568	0.79049	0.8246	0.026077	0.027432	0.028338	0.03254	0.033335	0.032123
12 h	2.67571	2.88394	3.65597	0.972863	1.10731	1.44365	0.026333	0.027633	0.020388	1.61795	1.82462	1.43074	0.047798	0.051019	0.036268	0.161158	0.19207	0.096918
24 h	1.08452	1.54437	1.50935	0.360524	0.417927	0.397028	0.131421	0.075908	0.067765	10.8342	10.1501	9.27703	0.242816	0.141984	0.127731	2.09643	2.27016	2.06504
0 h	0	0	0	0	0	0.091781	0	0	0	0.078359	0.086633	0.086393	0	0.01438	0.014346	0.019851	0.020958	0.020832
3 h	0	0	0	0.132633	0.13617	0.145229	0	0	0	0.169787	0.18352	0.200804	0.017227	0.017416	0.018067	0.021506	0.021707	0.022158
6 h	0.54084	0.520462	0.521686	0.188875	0.182045	0.171868	0	0	0	0.34393	0.325064	0.301691	0.021499	0.020224	0.019388	0.025411	0.024226	0.023634
9 h	2.36967	2.79025	3.06357	0.646483	0.741676	0.776494	0.017296	0.018651	0.018324	0.723128	0.898014	0.886614	0.029016	0.032025	0.030803	0.031082	0.034162	0.033856
12 h	2.50832	2.79994	2.84424	0.738271	0.906392	0.995992	0.019592	0.023803	0.020899	0.943852	1.33692	1.32357	0.03234	0.041483	0.036495	0.056724	0.08758	0.100529
24 h	1.05722	1.41799	1.58597	0.545669	1.28494	1.47481	0.095198	0.066642	0.07262	12.5586	11.2798	12.6852	0.210156	0.143883	0.158506	3.2549	2.9952	3.35268
0 h	0	0	0	0	0	0	0	0	0	0.09147	0.083675	0.086251	0.015409	0.014257	0.014848	0.022288	0.020881	0.021459
3 h	0	0	0	0.138972	0.146478	0.145821	0	0	0	0.189033	0.196965	0.184863	0.017633	0.017872	0.017031	0.021903	0.022013	0.021905
6 h	0.468765	0.523311	0.495848	0.156676	0.185396	0.177003	0	0	0	0.249049	0.333917	0.30504	0.018153	0.02079	0.017442	0.022785	0.025677	0.024907
9 h	2.35684	2.77594	2.89543	0.631687	0.755691	0.78285	0	0.017896	0.01759	0.68771	0.877614	0.834957	0.027416	0.030778	0.029766	0.03135	0.035982	0.035428
12 h	2.41711	2.66203	2.9591	0.75704	0.865063	1.19368	0.02308	0.026129	0.032362	1.00902	1.33995	2.02373	0.03961	0.047323	0.061257	0.062538	0.106398	0.247163
24 h	0.963626	1.02669	1.1795	0.149573	0.123775	0.518923	0.147216	0.132392	0.142779	9.15455	9.05441	12.2352	0.238779	0.212362	0.262426	2.74672	1.84888	2.67236

[truncated: 1 more sheets: Table S7]
